# Supplementary material
Source: PubMed Central journal article supplement (PMC4183167)

Appendix 2 (as supplied by authors)

eTable 1. Summary of Quantitative Results

| Outcome                     |       | No. of studies                                      | No. of South Asians/No. of White Caucasians | M.D/O.R* | C.I         | p-value | I <sup>2</sup> | P <sub>Het</sub> |
|-----------------------------|-------|-----------------------------------------------------|---------------------------------------------|----------|-------------|---------|----------------|------------------|
| BMI, kg/m <sup>2</sup>      | Men   | 5 cross-sectional                                   | 496/1788                                    | -0.52    | -1.51,0.47  | 0.31    | 76%            | <0.001           |
|                             | Women | 5 cross-sectional                                   | 457/2561                                    | -0.14    | -0.99,0.74  | 0.77    | 59%            | 0.02             |
| %Body fat                   | Men   | 3 cross-sectional                                   | 191/154                                     | 3.23     | 0.83,5.62   | 0.008   | 87%            | <0.001           |
|                             | Women | 3 cross-sectional                                   | 155/183                                     | 4.09     | 3.46,4.72   | <0.0001 | 6%             | 0.35             |
| WHR                         | Men   | 5 cross-sectional                                   | 412/346                                     | 0.02     | -0.01,0.04  | 0.20    | 82%            | <0.001           |
|                             | Women | 5 cross-sectional                                   | 400/407                                     | 0.02     | 0.01,0.04   | 0.006   | 59%            | 0.04             |
| Obesity Prevalence          |       | 3 Database reviews                                  | 3507/155237                                 | 0.62     | 0.40,0.96   | 0.03    | 40%            | 0.19             |
| Waist Circumference, cm     | Men   | 7 cross-sectional                                   | 578/2024                                    | -0.64    | -3.38,2.09  | 0.65    | 85%            | <0.001           |
|                             | Women | 7 cross-sectional                                   | 578/3067                                    | -0.02    | -2.32,2.28  | 0.98    | 82%            | <0.001           |
| Type II Diabetes Prevalence |       | 6 cross-sectional, 9 database reviews               | 14750/587563                                | 2.24     | 1.80,2.79   | <0.001  | 92%            | <0.001           |
| Fasting Insulin, pmol/L     |       | 6 cross-sectional                                   | 956/1450                                    | 19.16    | 13.86,24.46 | <0.001  | 96%            | <0.001           |
| Fasting Glucose, mmol/L     |       | 6 cross-sectional                                   | 975/1454                                    | 0.02     | -0.22,0.26  | 0.87    | 98%            | <0.001           |
| HOMA-IR                     |       | 5 cross-sectional                                   | 849/1367                                    | 0.75     | 0.33,1.17   | <0.001  | 96%            | <0.001           |
| SBP, mmHg                   |       | 6 cross-sectional                                   | 975/1473                                    | -1.96    | -3.76,-0.16 | 0.03    | 77%            | <0.001           |
| DBP, mmHg                   |       | 6 cross-sectional                                   | 975/1454                                    | -0.82    | -5.04, 3.39 | 0.70    | 100%           | <0.001           |
| Hypertension Prevalence     |       | 4 cross-sectional 9 database reviews                | 14916/638424                                | 1.11     | 1.02,1.22   | 0.02    | 70%            | <0.001           |
| HDL-C, mmol/L               |       | 7 cross-sectional                                   | 1054/1534                                   | -0.19    | -0.25,-0.13 | <0.001  | 65%            | <0.01            |
| LDL-C, mmol/L               |       | 5 cross-sectional                                   | 919/1402                                    | 0.09     | -0.13,0.30  | 0.43    | 94%            | <0.001           |
| TC, mmol/L                  |       | 6 cross-sectional                                   | 998/1482                                    | 0.17     | -0.09,0.44  | 0.20    | 87%            | <0.001           |
| TC:HDL-C                    |       | 6 cross-sectional                                   | 927/1418                                    | 0.65     | 0.28,1.01   | <0.001  | 90%            | <0.001           |
| Fasting TG, mmol/L          |       | 6 cross-sectional                                   | 975/1454                                    | 0.20     | 0.02,0.37   | 0.03    | 76%            | <0.01            |
| CRP, mg/L                   |       | 4 cross-sectional                                   | 679/644                                     | 0.76     | 0.37,1.15   | <0.001  | 3%             | 0.38             |
| Smoking                     |       | 7 cross-sectional 9 database reviews 1 case-control | 11642/506023                                | 0.38     | 0.24,0.60   | <0.001  | 97%            | <0.001           |

\*Mean Difference (M.D.) were reported for continuous outcomes and prevalence odds ratio (O.R.) were reported for dichotomous outcomes. BMI: Body Mass Index, WHR: Waist-to-hip ratio, HOMA-IR: Homeostatic Model Assessment- Insulin Resistance, SBP: Systolic Blood Pressure, DBP: Diastolic Blood Pressure, HDL-C: High Density Lipoprotein-Cholesterol, LDL-C: Low Density Lipoprotein-Cholesterol, TC: Total Cholesterol, TC:HDL-C: Ratio of Total Cholesterol to High Density Lipoprotein- Cholesterol, TG: Triglycerides, CRP: C-Reactive Protein

eTable 2. Secondary analyses to examine heterogeneity in results.

| Secondary analyses of high quality studies |       |                   |                                             |          |              |         |                |                  | Secondary analyses by sampling method** |                  |                                    |                  |                                  |                  |
|--------------------------------------------|-------|-------------------|---------------------------------------------|----------|--------------|---------|----------------|------------------|-----------------------------------------|------------------|------------------------------------|------------------|----------------------------------|------------------|
| Outcome                                    |       | No. of Studies    | No. of South Asians/No. of White Caucasians | M.D/ O.R | C.I          | p-value | I <sup>2</sup> | P <sub>Het</sub> | I <sup>2</sup> Random Sampling          | P <sub>Het</sub> | I <sup>2</sup> Non-Random Sampling | P <sub>Het</sub> | I <sup>2</sup> Between Sub-group | P <sub>Het</sub> |
| BMI, kg/m <sup>2</sup>                     | Men   | 2 cross-sectional | 292/258                                     | -1.11    | -3.66,1.44   | 0.39    | 89%            | 0.003            | N/A                                     | N/A              | 0                                  | 0.45             | 93.2%                            | <0.0001          |
|                                            | Women | 2 cross-sectional | 258/270                                     | -0.52    | -1.51,0.48   | 0.31    | 0%             | 0.33             |                                         |                  |                                    |                  |                                  |                  |
| % Body fat                                 | Men   | 1 cross-sectional | 105/101                                     | 4.70     | 2.88, 6.52   | <0.001  | N/A            | N/A              |                                         |                  |                                    |                  |                                  |                  |
|                                            | Women | 1 cross-sectional | 103/101                                     | 3.30     | 1.29,5.31    | 0.001   | N/A            | N/A              |                                         |                  |                                    |                  |                                  |                  |
| WHR                                        | Men   | 2 cross-sectional | 292/258                                     | 0        | -0.02,0.02   | 0.93    | 50%            | 0.16             |                                         |                  |                                    |                  |                                  |                  |
|                                            | Women | 2 cross-sectional | 258/270                                     | 0.02     | -0.02,0.06   | 0.33    | 87%            | 0.005            | N/A                                     | N/A              | 49%                                | 0.12             | 61.7 %                           | 0.11             |
| Waist Circumference, cm*                   | Men   | 2 cross-sectional | 282/255                                     | -2.96    | -9.13,3,21   | 0.35    | 90%            | 0.002            |                                         |                  |                                    |                  |                                  |                  |
|                                            | Women | 2 cross-sectional | 254/268                                     | 0.28     | -3.53,4.09   | 0.89    | 72%            | 0.06             |                                         |                  |                                    |                  |                                  |                  |
| Fasting Insulin, pmol/L                    |       | 2 cross-sectional | 530/523                                     | 24.72    | 17.33, 32.10 | <0.001  | 60%            | 0.11             |                                         |                  |                                    |                  |                                  |                  |
| Fasting Glucose, mmol/L                    |       | 2 cross-sectional | 549/527                                     | 0.26     | 0.13, 0.40   | <0.001  | 35%            | 0.21             |                                         |                  |                                    |                  |                                  |                  |
| HOMA-IR                                    |       | 2 cross-sectional | 516/509                                     | 0.84     | 0.64, 1.05   | <0.001  | 56%            | 0.13             |                                         |                  |                                    |                  |                                  |                  |
| SBP, mmHg                                  |       | 2 cross-sectional | 549/527                                     | 0.26     | -1.64,2.15   | 0.79    | 0%             | 0.32             |                                         |                  |                                    |                  |                                  |                  |
| DBP, mmHg                                  |       | 2 cross-sectional | 549/527                                     | 2.08     | 0.13,4.04    | 0.04    | 59%            | 0.12             |                                         |                  |                                    |                  |                                  |                  |
| HDL-C, mmol/L                              |       | 2 cross-sectional | 549/527                                     | -0.15    | -0.18, -0.11 | <0.01   | 0%             | 0.81             |                                         |                  |                                    |                  |                                  |                  |
| LDL-C, mmol/L                              |       | 2 cross-sectional | 549/527                                     | 0.09     | -0.01,0.19   | 0.09    | 2%             | 0.31             |                                         |                  |                                    |                  |                                  |                  |
| TC, mmol/L*                                |       | 2 cross-sectional | 549/527                                     | 0.33     | -0.34, 1.01  | 0.33    | 91%            | <0.001           |                                         |                  |                                    |                  |                                  |                  |

|                                |                                                          |                |             |                   |                  |            |             |                                             |                               |                                             |                               |                             |                               |
|--------------------------------|----------------------------------------------------------|----------------|-------------|-------------------|------------------|------------|-------------|---------------------------------------------|-------------------------------|---------------------------------------------|-------------------------------|-----------------------------|-------------------------------|
| <b>TC:HDL-C</b>                | <b>2 cross-sectional</b>                                 | <b>535/522</b> | <b>0.50</b> | <b>0.29, 0.72</b> | <b>&lt;0.001</b> | <b>26%</b> | <b>0.24</b> |                                             |                               |                                             |                               |                             |                               |
| <b>Fasting TG, mmol/L</b>      | 2 cross-sectional                                        | 549/527        | 0.29        | 0.14, 0.43        | <0.001           | 0%         | 0.63        |                                             |                               |                                             |                               |                             |                               |
| <b>Smoking Prevalence</b>      | 2 cross-sectional<br>1 database review<br>1 case-control | 770/3806       | 0.28        | 0.21,0.37         | <0.001           | 0%         | 0.50        |                                             |                               |                                             |                               |                             |                               |
| <b>CRP, mg/L</b>               | 2 cross-sectional                                        | 530/523        | 0.79        | 0.29,1.28         | 0.002            | 0%         | 0.75        |                                             |                               |                                             |                               |                             |                               |
|                                |                                                          |                |             |                   |                  |            |             | <b>Secondary analyses by study design**</b> |                               |                                             |                               |                             |                               |
|                                |                                                          |                |             |                   |                  |            |             | <b><i>I</i><sup>2</sup> Datab</b>           | <b><i>P</i><sub>Het</sub></b> | <b><i>I</i><sup>2</sup> Cross-sectional</b> | <b><i>P</i><sub>Het</sub></b> | <b><i>I</i><sup>2</sup></b> | <b><i>P</i><sub>Het</sub></b> |
| <b>Diabetes Prevalence</b>     | 2 cross-sectional<br>1 database review<br>1 case-control | 3668/7981<br>9 | 2           | 1.85,2.14         | <0.001           | 0%         | 0.67        | 96%                                         | <0.01                         | 0%                                          | 0.61                          | 92%                         | <0.001                        |
| <b>Hypertension Prevalence</b> | 1 cross-sectional<br>1 database review                   | 3403/7764<br>0 | 1.14        | 1.06,1.22         | <0.001           | 0%         | 0.60        | 70%                                         | <0.01                         | 47%                                         | 0.13                          | 58.3                        | 0.12                          |

\*For a detailed explanation on heterogeneity, see Appendix 3.

\*\* Secondary sub-groups analyses to explain heterogeneity, if unexplained by analyses of high-quality studies

BMI: Body Mass Index, WHR: Waist-to-hip ratio, HOMA-IR: Homeostatic Model Assessment- Insulin Resistance, SBP: Systolic Blood Pressure, DBP: Diastolic Blood Pressure, HDL-C: High Density Lipoprotein- Cholesterol, LDL-C: Low Density Lipoprotein-Cholesterol, TC: Total Cholesterol, TC:HDL-C: Ratio of Total Cholesterol to High Density Lipoprotein- Cholesterol, TG: Triglycerides, CRP: C-Reactive Protein

**eFigure 1. Forest plot of comparison: South Asians vs. White Caucasians, outcome: Waist Circumference [cm] men.**

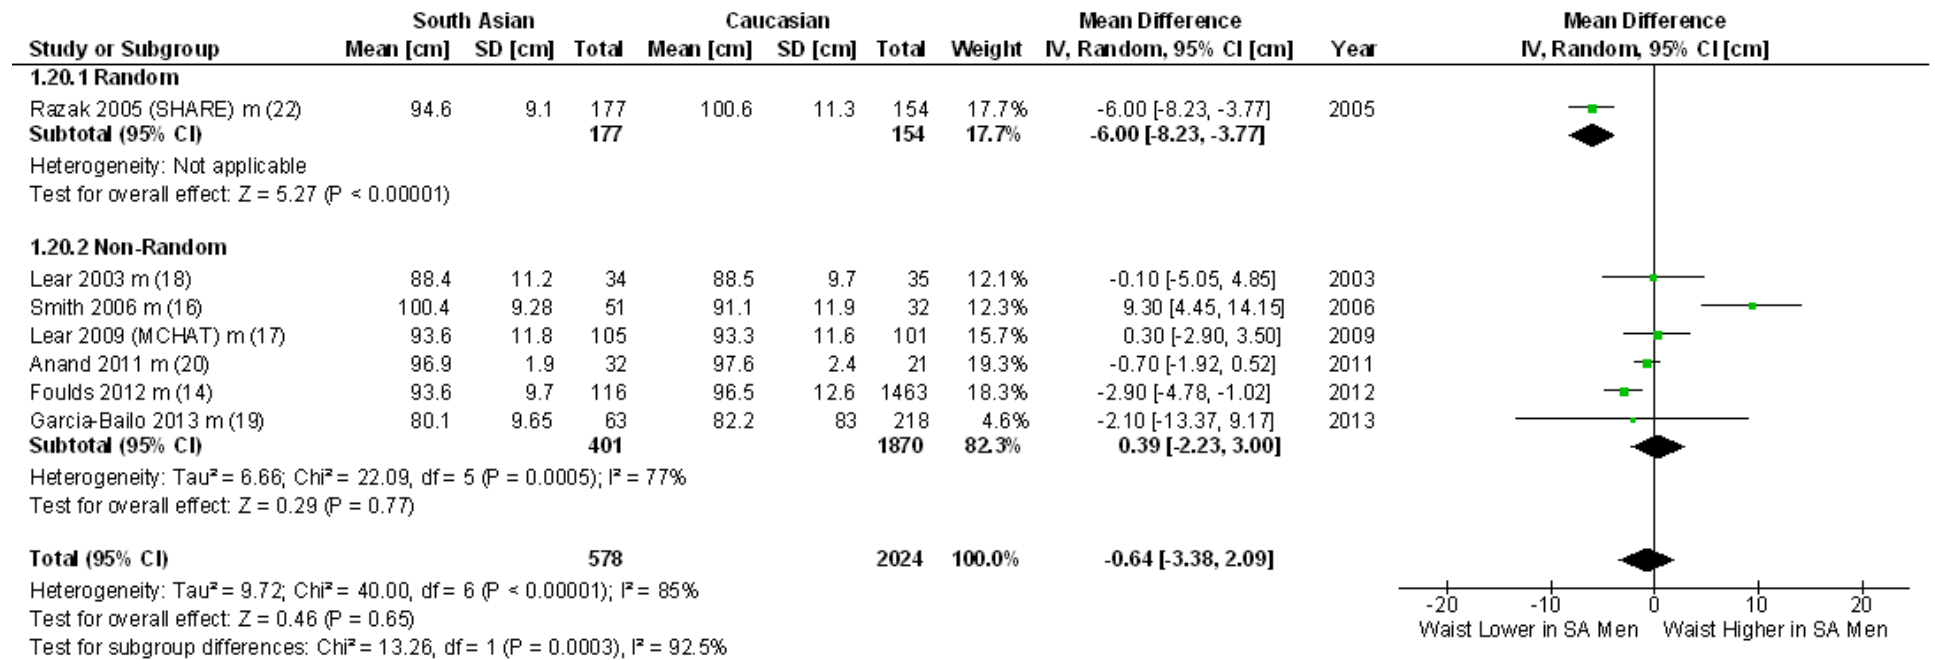

**eFigure 2. Forest plot of comparison: South Asians vs. White Caucasians, outcome: Waist Circumference [cm] women.**

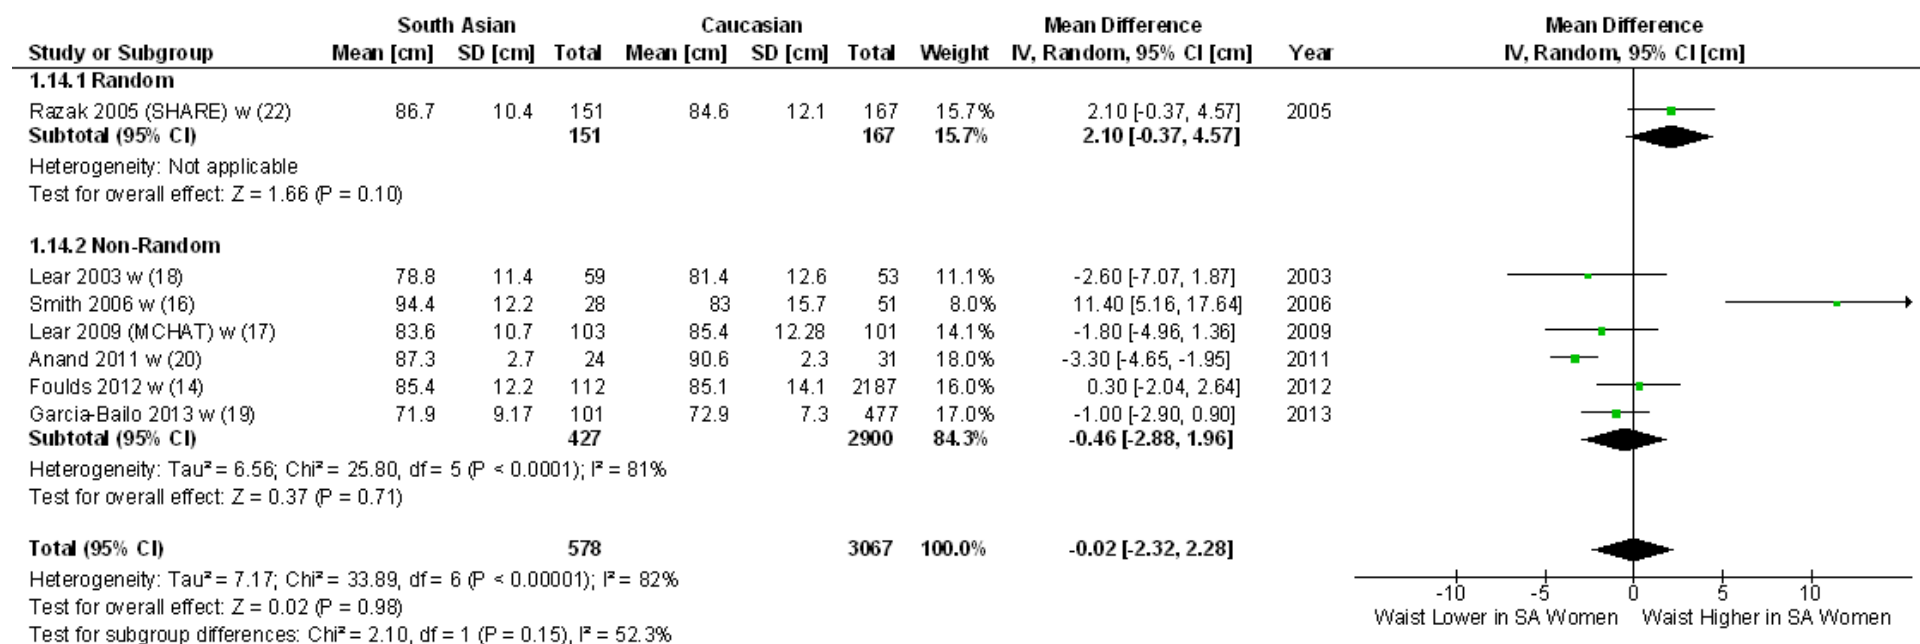

eFigure 3. Forest plot of comparison: South Asians vs. White Caucasians, outcome: WHR men

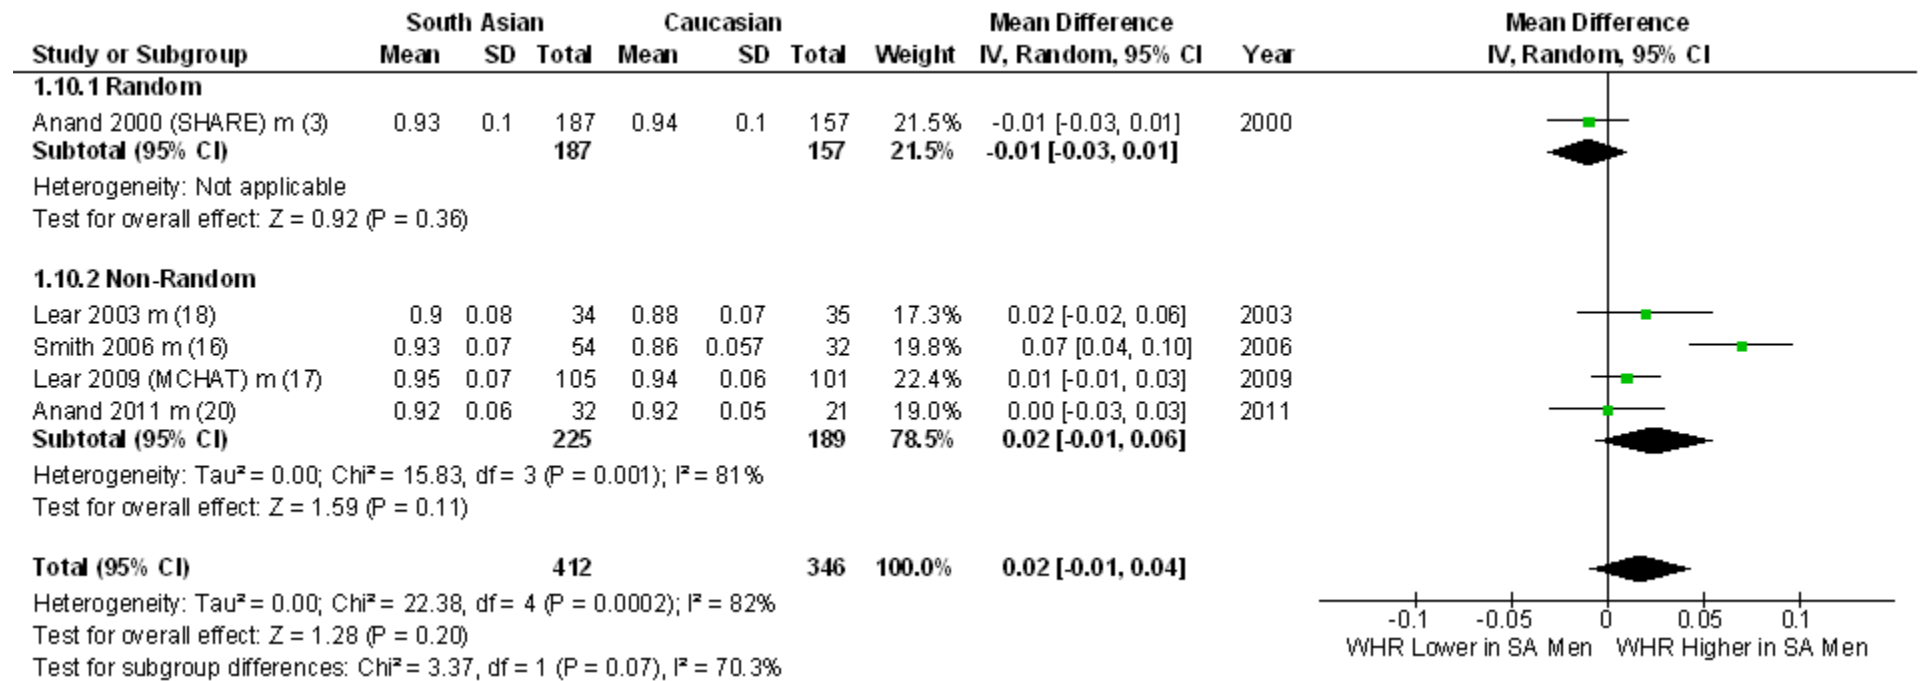

**Figure 4. Forest plot of comparison: South Asians vs. White Caucasians, outcome: WHR women**

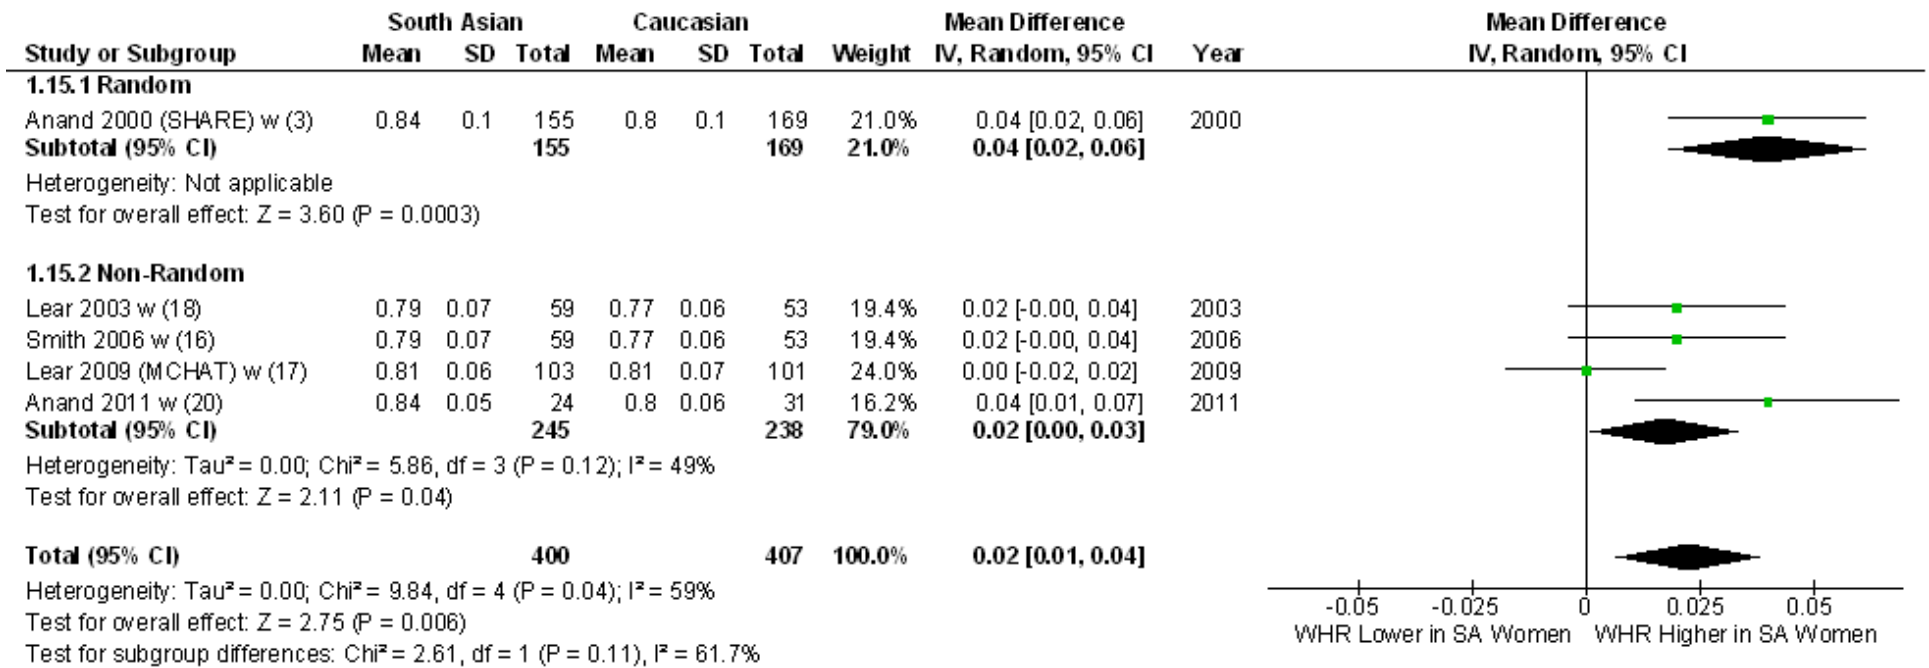

**eFigure 5. Forest plot of comparison: South Asians vs. White Caucasians, outcome: Obesity**

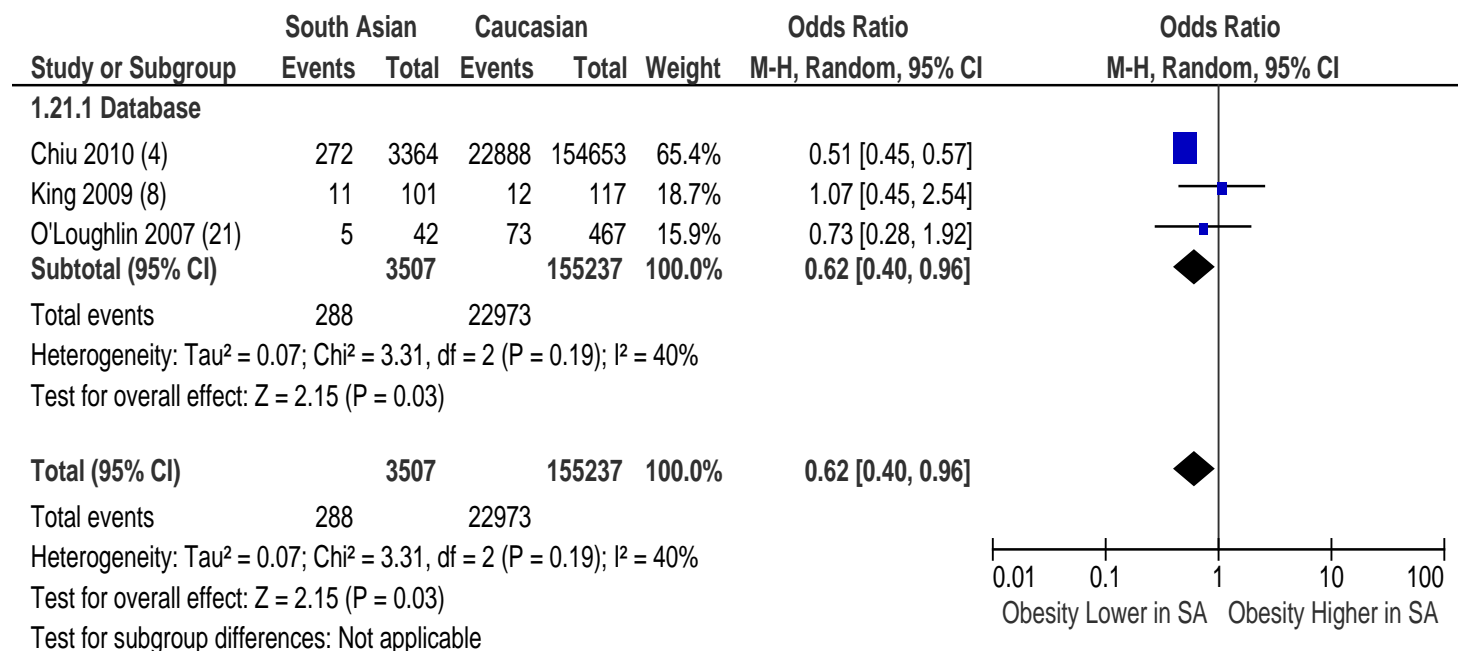



**eFigure 6. Forest plot of comparison: South Asians vs. White Caucasians, outcome: Fasting Blood Glucose [mmol/L].**

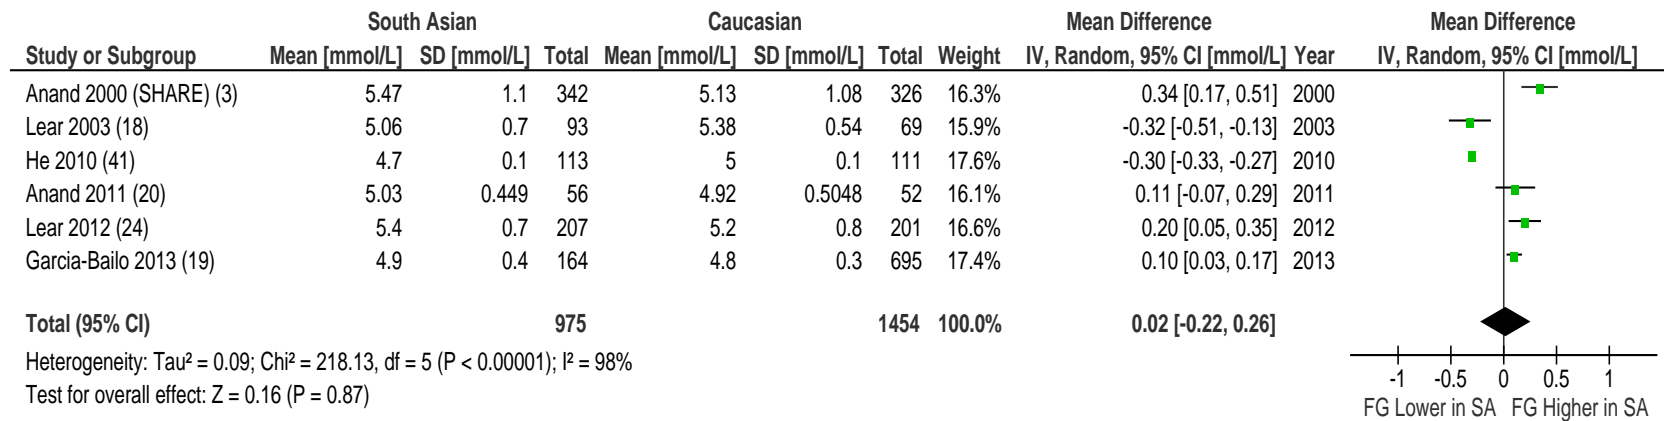

**eFigure 7. Forest plot of comparison: South Asians vs. White Caucasians, outcome: Fasting Insulin [pmol/L].**

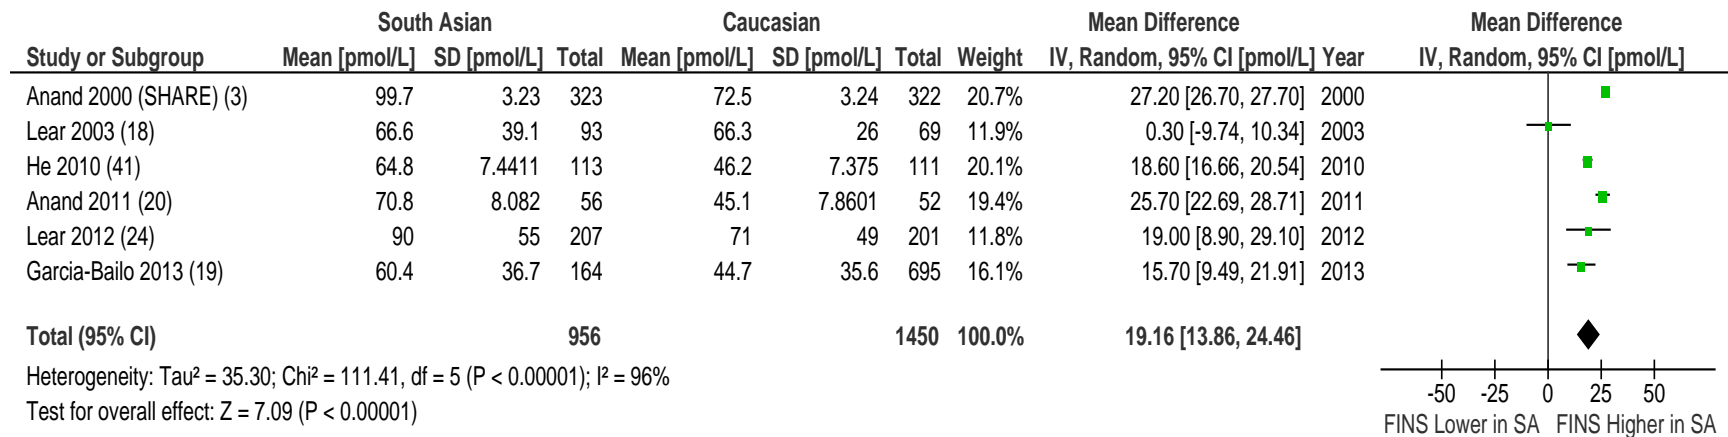

**eFigure 8. Forest plot of comparison: South Asians vs. White Caucasians, outcome: HOMA-IR**

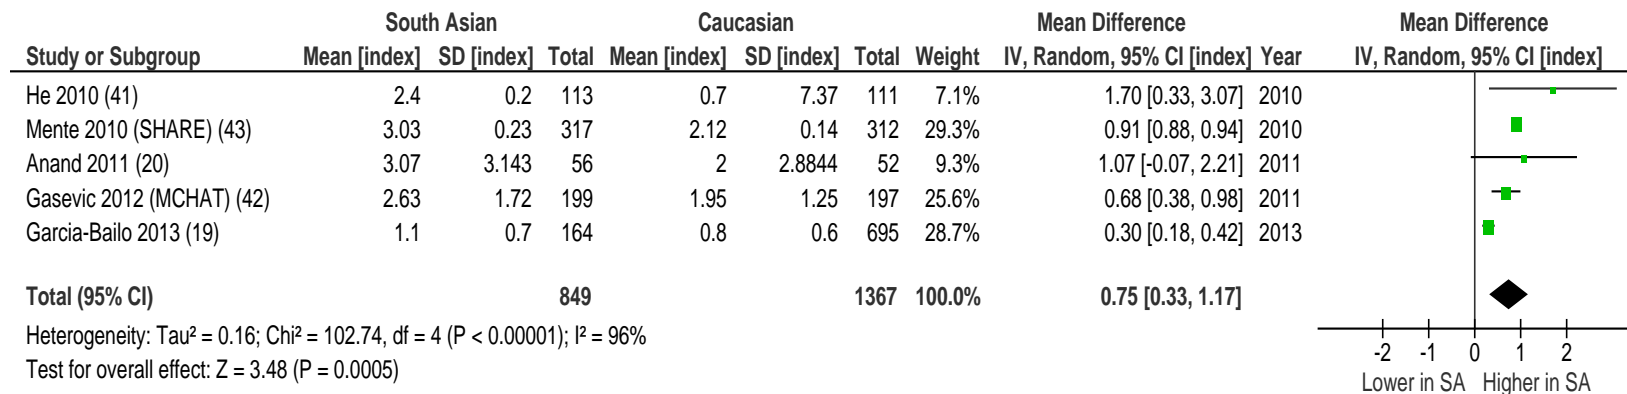

**eFigure 9. Forest plot of comparison: South Asians vs. White Caucasians, outcome: SBP [mmHg].**

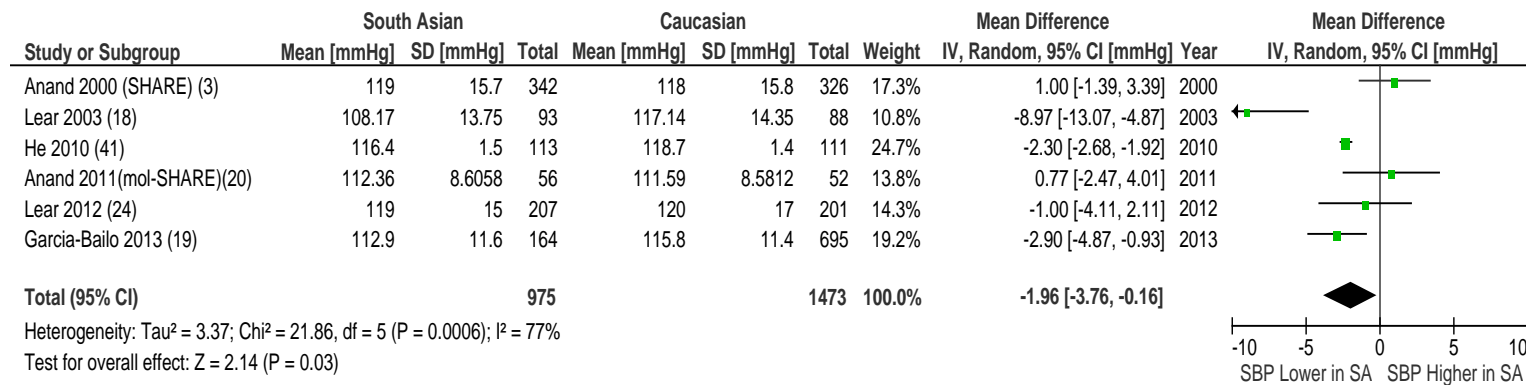

**eFigure 10. Forest plot of comparison: South Asians vs. White Caucasians, outcome: DBP [mmHg].**

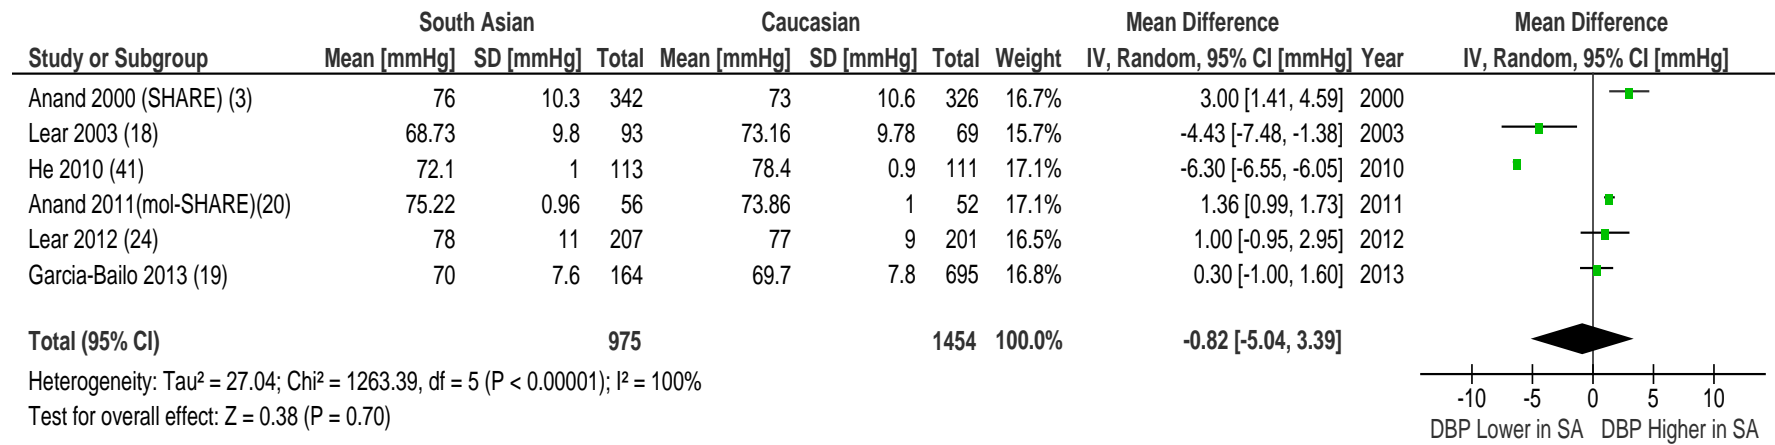



**eFigure 12. Forest plot of comparison: South Asians vs. White Caucasians, outcome: Total Cholesterol [mmol/L].**

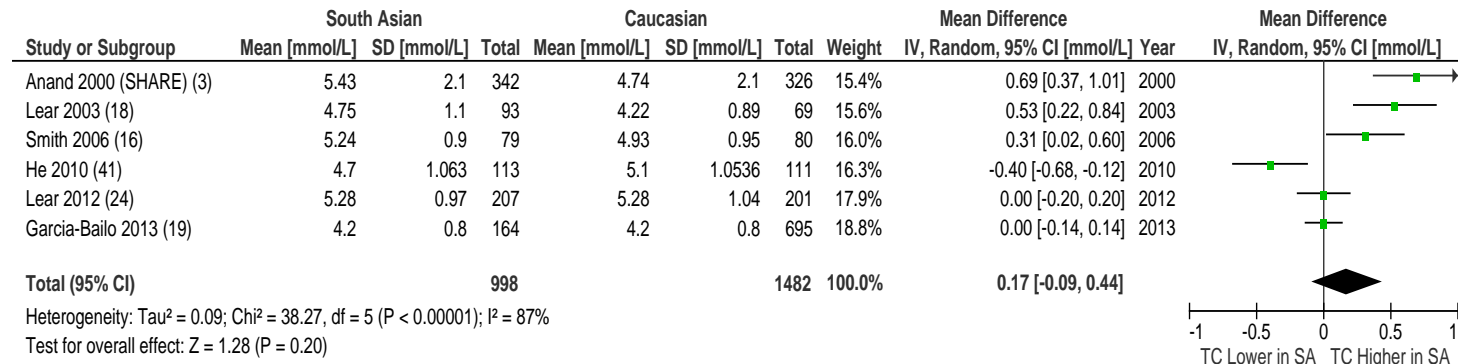

**eFigure 13. Forest plot of comparison: South Asians vs. White Caucasians, outcome: LDL-C [mmol/L].**

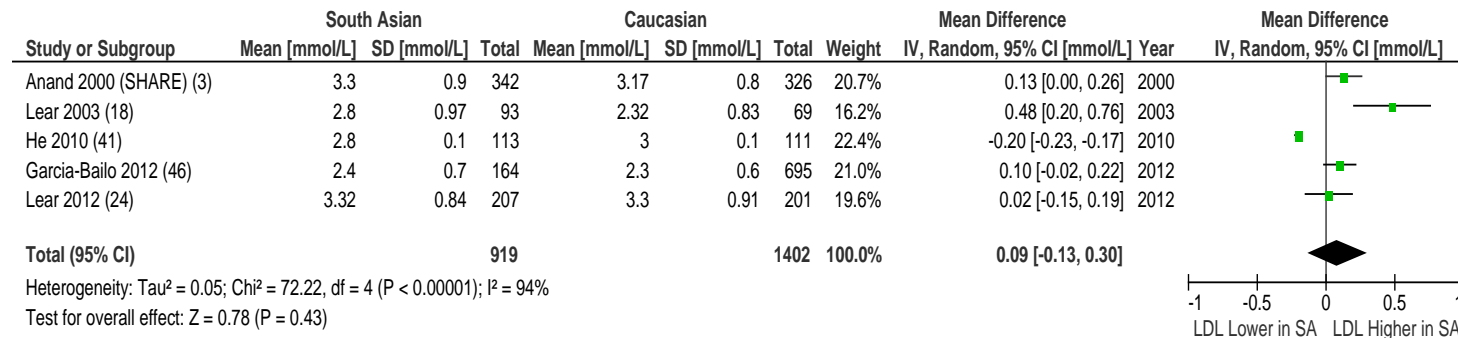

**eFigure 14. Forest plot of comparison: South Asians vs. White Caucasians, outcome: HDL-C [mmol/L].**

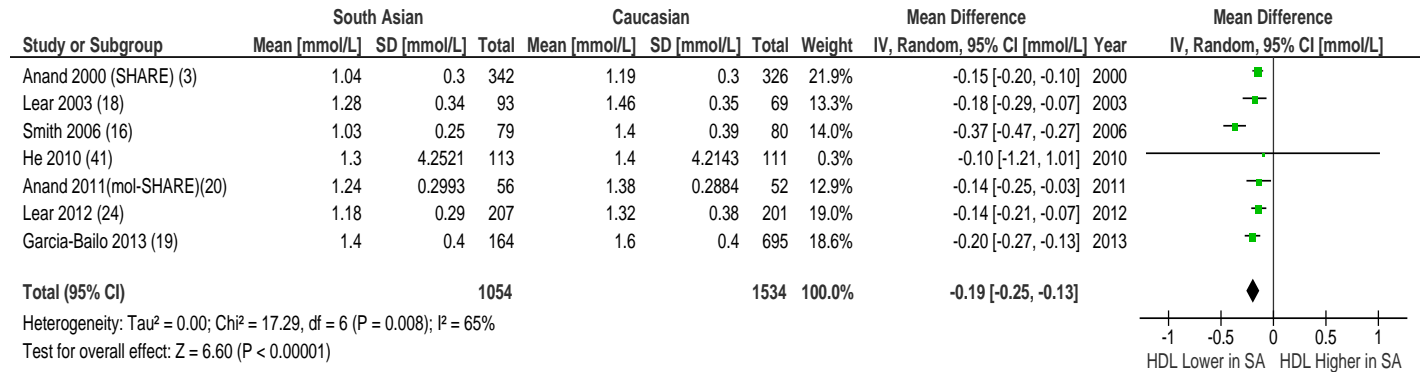

**eFigure 15. Forest plot of comparison: South Asians vs. White Caucasians, outcome: Fasting TG [mmol/L].**

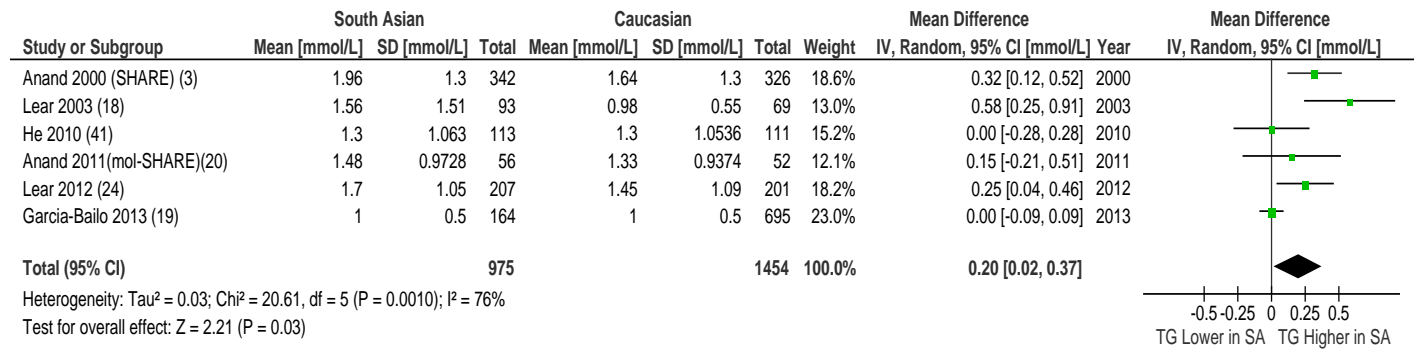

**eFigure 16. Forest plot of comparison: South Asians vs. White Caucasians, outcome: TC:HDL.**

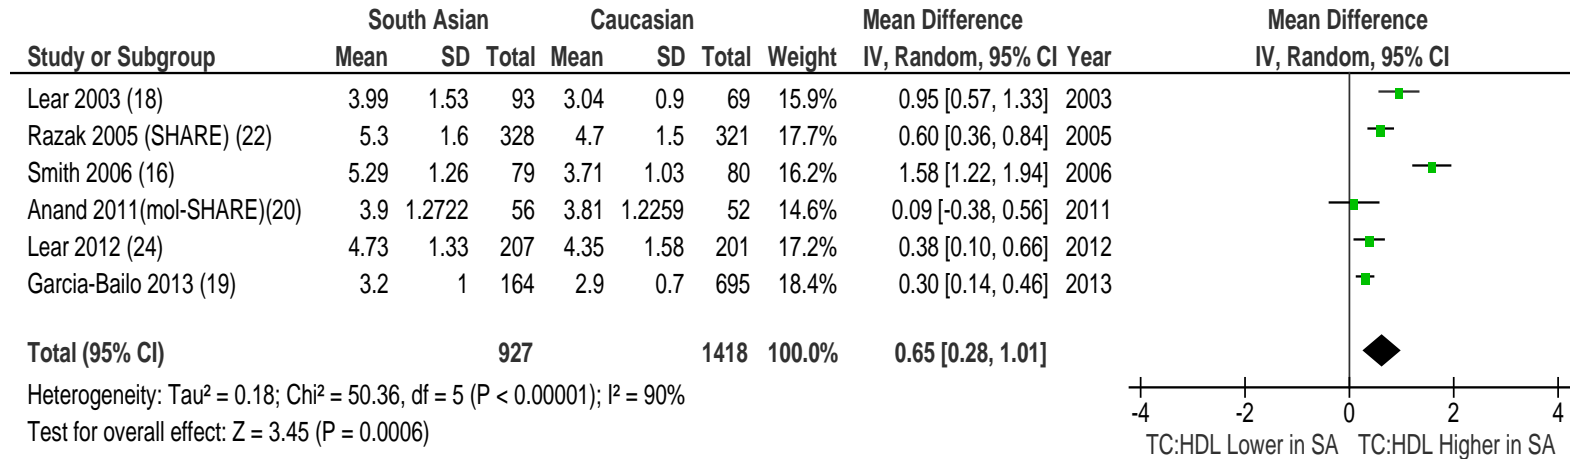

**eFigure 17. Forest plot of comparison: South Asians vs. White Caucasians, outcome: CRP [mg/L].**

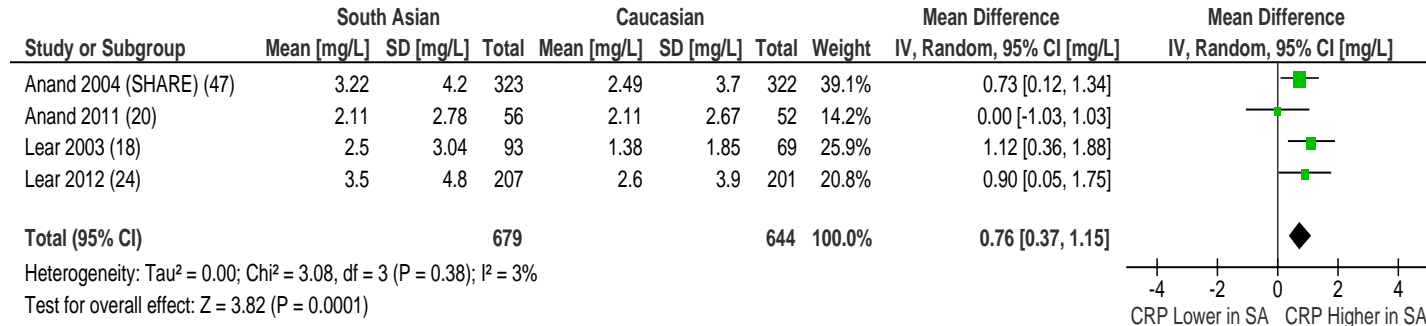

**eFigure 18. Forest plot of comparison: South Asians vs. White Caucasians, outcome: Smoking**

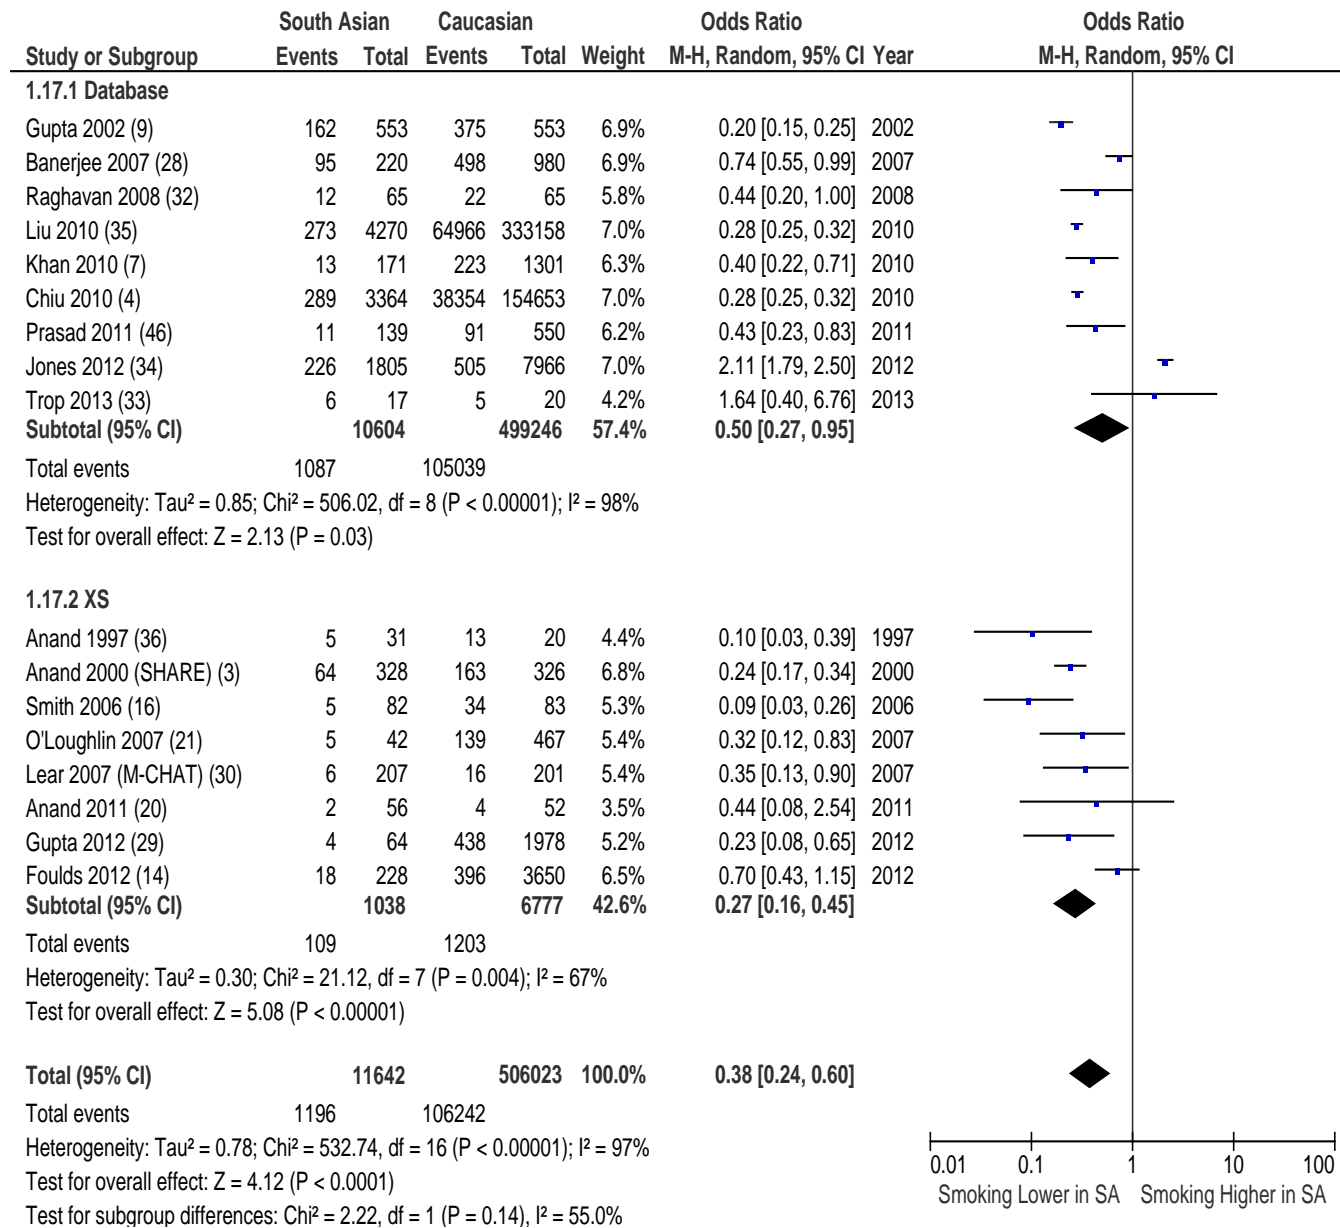

Supplement: supp_2.3.E183_2013-0064-2-at.pdf [file supp_2.3.E183_2013-0064-2-at.pdf]
