# Supplementary material
Source: PubMed Central journal article supplement (PMC4183167)
Supplement: supp_2.3.E183_2013-0064-1-at.pdf [file supp_2.3.E183_2013-0064-1-at.pdf]

## Appendix 1 (as supplied by authors): Search strategy

- 1 Cardiovascular disease.mp. or exp Cardiovascular Diseases/ (1734638)
- 2 cardio\*.mp. (569398)
- 3 cardia\*.mp. (495840)
- 4 heart\*.mp. (918316)
- 5 coronary\*.mp. (11)
- 6 angina\*.mp. (58123)
- 7 ventric\*.mp. (335032)
- 8 myocard\*.mp. (422793)
- 9 pericard\*.mp. (37376)
- 10 ischemi\*.mp. (248980)
- 11 emboli\*.mp. (110278)
- 12 arrhythmi\*.mp. (100902)
- 13 thrombo\*.mp. (312886)
- 14 atrial fibrillat\*.mp. (39508)
- 15 tachycardi\*.mp. (57832)
- 16 endocardi\*.mp. (43527)
- 17 cardiomyopathy.mp. (47501)
- 18 vascul\*.mp. (583854)
- 19 cerebrovasc\*.mp. (102586)
- 20 sick sinus\*.mp. (2945)
- 21 1 or 2 or 3 or 4 or 5 or 6 or 7 or 8 or 9 or 10 or 11 or 12 or 13 or 14 or 15 or 16 or 17 or 18 or 19 or 20 (2893189)
- 22 south asian\*.mp. (2379)
- 23 exp Asian Continental Ancestry Group/ (31766)

Appendix to: Rana A, de Souza RJ, Kandasamy S, Lear SA, Anand SS. Cardiovascular risk among South Asians living in Canada: a systematic review. *CMAJ Open* 2014. DOI: 10.9778/cmajo.20130064.

Copyright © 2014 Canadian Medical Association or its licensors

- 24 exp India/ or india\*.mp. (125658)
- 25 indian\*.mp. (60002)
- 26 exp bangladesh/ or exp india/ or exp nepal/ or exp pakistan/ or exp sri lanka/ (86935)
- 27 pakistan\*.mp. (12324)
- 28 pakistani\*.mp. (2486)
- 29 bangladesh\*.mp. (7970)
- 30 bengali\*.mp. (229)
- 31 nepal\*.mp. (5363)
- 32 Srilanka\*.mp. (7)
- 33 indo\*.mp. (146235)
- 34 ethnic groups/ or asian americans/ (42900)
- 35 indo canadian.mp. (13)
- 36 indo asian.mp. (98)
- 37 asian canad\*.mp. (47)
- 38 22 or 24 or 25 or 26 or 27 or 28 or 29 or 30 or 31 or 32 or 33 or 34 or 35 or 36 or 37 (333775)
- 39 cholesterol\*.mp. or exp Cholesterol/ (203403)
- 40 lipid\*.mp. (375922)
- 41 apolipoprotein B.mp. or exp Apolipoproteins B/ (12242)
- 42 hyperlipid\*.mp. or exp Hyperlipidemias/ (61618)
- 43 lipaemia.mp. (403)
- 44 blood pressure.mp. or exp Blood Pressure/ (340494)
- 45 BP.mp. (105093)
- 46 SBP.mp. (10707)
- 47 DBP.mp. (8568)
- 48 mean arterial pressure.mp. (22707)

- 49 hypertensi\*.mp. (345936)
- 50 exp Hypertension/ (195670)
- 51 exp Acute-Phase Proteins/ (139403)
- 52 body weight.mp. or exp Body Weight/ (392043)
- 53 body fat.mp. or exp Adipose Tissue/ (75928)
- 54 Body Mass Index/ or BMI.mp. (92077)
- 55 waist circumference.mp. or exp Waist Circumference/ (10470)
- 56 Body Constitution/ or waist to hip.mp. or Waist-Hip Ratio/ (16792)
- 57 exp Triglycerides/ (58028)
- 58 hyperglycemia/ or glucose intolerance/ or hyperinsulinism/ or exp insulin resistance/ or exp metabolic syndrome x/ (68481)
- 59 exp Hypercholesterolemia/ or hypercholesterol\*.mp. (34480)
- 60 39 or 40 or 41 or 42 or 43 or 44 or 45 or 46 or 47 or 48 or 49 or 50 or 51 or 52 or 53 or 54 or 55 or 56 or 57 or 58 or 59 (1675739)
- 61 38 and 60 (32676)
- 62 21 and 38 (40412)
- 63 21 and 23 (5073)
