# Supplementary material
Source: PubMed Central journal article supplement (PMC4183167)
Supplement: supp_2.3.E183_2013-0064-4-at.pdf [file supp_2.3.E183_2013-0064-4-at.pdf]

**Appendix 4 (as supplied by authors): Study characteristics of primary publications included in the review.**

|                                   | Main study/<br>database              | City,<br>province                           | Study<br>design                       | Study<br>duration       | No. of<br>people | Men/<br>women,<br>%                             | Mean<br>age, yr                        | No. of<br>South<br>Asians | South<br>Asian,<br>% | Outcomes<br>measured                                                                                                                    | Study<br>Score |
|-----------------------------------|--------------------------------------|---------------------------------------------|---------------------------------------|-------------------------|------------------|-------------------------------------------------|----------------------------------------|---------------------------|----------------------|-----------------------------------------------------------------------------------------------------------------------------------------|----------------|
| Albarak et al, 2012 <sup>27</sup> | Hospital Discharge Abstract Database | British Columbia                            | Retrospective cohort                  | 8 yr                    | 7 135            | South Asians: 90/10<br>White People: 82/18      | N/A                                    | 487                       | 6.8                  | Diabetes prevalence, hypertension prevalence, 30-day mortality after AMI, long-term mortality after AMI, recurrent AMI                  | 4              |
| Anand et al, 2000 <sup>3</sup>    | SHARE                                | Hamilton<br>Toronto<br>Edmonton             | Cross-sectional<br>Random<br>sampling | N/A                     | 985              | South Asians: 55/45,<br>White people: 48/52     | South Asians: 49.4, White people: 51.2 | 342                       | 34.7                 | CVD prevalence, SBP,DBP,BMI, WHR, TC, LDL-C, HDL-C, TG, fasting glucose, Apo A1 and B levels, homocysteine, lipoprotein (a), fibrinogen | 6              |
| Anand et al, 2004 <sup>47</sup>   | SHARE/<br>SHARE-AP                   | Hamilton<br>Toronto<br>Edmonton<br>Oshweken | Cross-sectional<br>Random<br>sampling | N/A                     | 1 250            | 48.9/ 51.1                                      | 50.4                                   | 323                       | 25.9                 | CRP                                                                                                                                     | 5              |
| Anand et al, 2006 <sup>48</sup>   | SHARE/<br>SHARE-AP                   | Toronto<br>Edmonton<br>Hamilton<br>Oshweken | Cross-sectional<br>Random<br>sampling | N/A                     | 1 227            | White people: 48.2/ 51.8<br>South Asians: 55/45 | White people: 51.3, South Asians: 49.4 | 342                       | 27.9                 | Socioeconomic status                                                                                                                    | 5              |
| Anand et al, 2011 <sup>20</sup>   | mol-<br>SHARE                        | Hamilton                                    | Cross-sectional                       | 2005–<br>2009<br>(4 yr) | 108              | 49/51                                           | 35                                     | 56                        | 52                   | Fasting insulin, HDL-C, adipocyte area, lean muscle mass, liver fat, visceral fat, superficial subcutaneous fat, deep subcutaneous fat  | 4              |
| Anand et al, 1997 <sup>36</sup>   | SHARE-<br>pilot                      | Hamilton                                    | Cross-sectional<br>Random<br>sampling | N/A                     | 51               | N/A                                             | N/A                                    | 31                        | 61.8                 | Impaired glucose tolerance, diabetes,                                                                                                   | 3              |

Appendix to: Rana A, de Souza RJ, Kandasamy S, Lear SA, Anand SS. Cardiovascular risk among South Asians living in Canada: a systematic review. *CMAJ Open* 2014. DOI: 10.9778/cmajo.20130064.

Copyright © 2014 Canadian Medical Association or its licensors

|                                    |                                                                 |         |                               |                   |           |                                                      |                                          |       |      |                                                                                                           |     |
|------------------------------------|-----------------------------------------------------------------|---------|-------------------------------|-------------------|-----------|------------------------------------------------------|------------------------------------------|-------|------|-----------------------------------------------------------------------------------------------------------|-----|
|                                    |                                                                 |         |                               |                   |           |                                                      |                                          |       |      | hypertension and smoking prevalence                                                                       |     |
| Bailey et al, 2011 <sup>47</sup>   | APPROACH                                                        | Alberta | Retrospective database review | 1995–2006 (11 yr) | 19 569    | South Asians: 78/22<br>White people: 74/22           | South Asians: 22.1<br>White people: 26.0 | 635   | 3.2  | Health status outcomes                                                                                    | 5   |
| Banerjee et al, 2007 <sup>28</sup> | Hospital rehabilitation records                                 | Toronto | Retrospective database review | 2 year            | 1 200     | South Asians: 84.5/ 15.5<br>White people: 73.4/ 26.6 | South Asians: 56.2<br>White people: 59.0 | 220   | 18.3 | Cardiac rehabilitation program participation, prevalence of smoking, diabetes, hypertension               | 3   |
| Banerjee et al, 2010 <sup>53</sup> | N/A                                                             | Toronto | Qualitative study             | N/A               | 16        | 81.2/ 18.8                                           | 57.4                                     | 16    | 100  | Barriers to cardiac rehabilitation participation                                                          | 2/4 |
| Booth et al, 2012 <sup>52</sup>    | Administrative database                                         | Toronto | Retrospective cohort          | N/A               | 1 239 262 | 50/50                                                | N/A                                      | N/A   | N/A  | Physical activity: walkability score                                                                      | 3   |
| Brisler et al, 2007 <sup>58</sup>  | Chart Review                                                    | Toronto | Retrospective cohort          | 1994–2003         | 6 191     | South Asians: 22/78<br>White people: 22/78           | South Asians: 60.8<br>White people: 63.6 | 1 163 | 19   | CABG utilization, post CABG mortality                                                                     | 4   |
| Chiu et al, 2010 <sup>4</sup>      | NPHS 1996 & CCHS cycles 1.1 (2001), 2.1 (2003), and 3.1 (2005)  | Ontario | Database review               | 1996–2007 (11 yr) | 163 797   | 49.1/50.9                                            | 42.3                                     | 3 364 | 2.1  | Diet, physical activity, prevalence of CVD, smoking, diabetes, obesity, hypertension, psychosocial stress | 3   |
| Chiu et al, 2011 <sup>37</sup>     | NPHS 1996 & CCHS cycles 1.1 (2001), 2.1 (2003), and 3.1 (2005)  | Ontario | Database review               | 12.8 year         | 59 824    | White people: 49.1/ 50.9<br>South Asians: 56.8/ 43.2 | White people: 48.5<br>South Asians: 43.7 | 1 001 | 1.7  | Diabetes incidence rates, median age at diagnosis                                                         | 3   |
| Chiu et al, 2012 <sup>2</sup>      | NPHS 1996 & CCHS Cycles 1.1 (2001), 2.1 (2003), 3.1 (2005), and | Ontario | Retrospective cohort          | N/A               | 163 797   | 49.1/ 50.9                                           | 42                                       | 3 364 | 2.1  | Diet                                                                                                      | 3   |

Appendix to: Rana A, de Souza RJ, Kandasamy S, Lear SA, Anand SS. Cardiovascular risk among South Asians living in Canada: a systematic review. *CMAJ Open* 2014. DOI: 10.9778/cmajo.20130064.

Copyright © 2014 Canadian Medical Association or its licensors

|                                        | 4.1 (2007)                          |                  |                                                   |                         |       |                                                                                      |                                                                                                                                                                                  |     |      |                                                                                                                |     |
|----------------------------------------|-------------------------------------|------------------|---------------------------------------------------|-------------------------|-------|--------------------------------------------------------------------------------------|----------------------------------------------------------------------------------------------------------------------------------------------------------------------------------|-----|------|----------------------------------------------------------------------------------------------------------------|-----|
| Foulds et al, 2012 <sup>14</sup>       | N/A                                 | British Columbia | Cross-sectional                                   | N/A                     | 5 335 | Aboriginal: 25/75<br>White people: 40/60<br>East Asian: 40/60<br>South Asians: 51/49 | Aboriginal M: 43<br>Aboriginal W: 41<br>White people M: 51.7<br>White people W: 49.8<br>East Asian M: 45.6<br>East Asian W: 45.3<br>South Asians M: 45.6<br>South Asians W: 43.1 | 228 | 4.3  | BMI, WC, SBP, DBP, TC, HDL, LDL, TC:HDL, smoking, physical activity, CVD, hypertension and diabetes prevalence | 3   |
| Garcia-Bailo et al, 2012 <sup>45</sup> | TNH                                 | Toronto          | Cross-sectional                                   | N/A                     | 1 090 | 30/90                                                                                | M: 22.9<br>W: 22.6                                                                                                                                                               | 113 | 10   | Apo A1, Apo B                                                                                                  | 3   |
| Garcia-Bailo et al, 2013 <sup>19</sup> | TNH                                 | Toronto          | Cross-sectional                                   | N/A                     | 1 384 | White people: 31/69<br>South Asians: 38/62<br>East Asian: 28/72                      | White people: 23.2<br>South Asians: 22.2<br>East Asian: 22.1                                                                                                                     | 164 | 11.8 | SBP, DBP, fasting insulin, fasting glucose, TC, HDL, LDL, TC:HDL, BMI, waist circumference                     | 3   |
| Gasevic et al, 2013 <sup>55</sup>      | Hospital Administrative Data & BCCR | British Columbia | Retrospective cohort                              | Apr. 1999–<br>Mar. 2003 | 4 729 | White people: 73/27<br>South Asians: 80/20<br>Chinese: 75/25                         | N/A                                                                                                                                                                              | 371 | 7.8  | Short and long-term mortality                                                                                  | 4   |
| Gasevic et al, 2012 <sup>42</sup>      | M-CHAT                              | Vancouver        | Cross-sectional<br>Targeted ethnic group sampling | N/A                     | 784   | White people: 50/50<br>South Asians: 50/50                                           | White people: 50<br>South Asians: 45                                                                                                                                             | 199 | 2500 | HOMA-IR                                                                                                        | 4   |
| Grewal et al, 2010 <sup>54</sup>       | N/A                                 | Ontario          | Qualitative study                                 | N/A                     | 16    | 94/6                                                                                 | 62.6                                                                                                                                                                             | 16  | 100  | Cardiac rehabilitation referral                                                                                | 1/4 |
| Gupta et al, 2012 <sup>29</sup>        | ACTFAST                             | Montreal         | Case-Control                                      | N/A                     | 2 042 | White people: 67/33<br>South Asians: 77/23                                           | White people: 64<br>South Asians: 59                                                                                                                                             | 64  | 3.1  | Prevalence of diabetes and smoking                                                                             | 5   |

Appendix to: Rana A, de Souza RJ, Kandasamy S, Lear SA, Anand SS. Cardiovascular risk among South Asians living in Canada: a systematic review. *CMAJ Open* 2014. DOI: 10.9778/cmajo.20130064.

Copyright © 2014 Canadian Medical Association or its licensors

|                                 |                                              |                          |                                                |                                     |         |                                                                                   |                                                                           |        |      |                                                             |   |
|---------------------------------|----------------------------------------------|--------------------------|------------------------------------------------|-------------------------------------|---------|-----------------------------------------------------------------------------------|---------------------------------------------------------------------------|--------|------|-------------------------------------------------------------|---|
| Gupta et al, 2002 <sup>9</sup>  | Hospital chart review                        | Brampton Scarborough     | Retrospective chart review                     | 1994–1999 (5 yr)                    | 1 106   | N/A                                                                               | South Asians: 62.6<br>Non–South Asians: 63.0                              | 553    | 50   | Acute MI, diabetes prevalence, access to diagnostic testing | 4 |
| Jones et al, 2012 <sup>34</sup> | N/A                                          | London                   | Retrospective Cohort                           | Jan. 2003–Sept. 2008                | 9 771   | White people: 72/28<br>South Asians: 79/21                                        | White people: 64.7<br>South Asians: 59.7                                  | 1 805  | 18.5 | Short-term mortality, diabetes, hypertension, smoking       | 4 |
| Kaul et al, 2011 <sup>44</sup>  | Alberta Health and Wellness databases        | Alberta                  | Retrospective cohort                           | 1999–2005                           | 54 208  | South Asians: 47.2/ 52.8<br>White people: 50/50                                   | White people: 76.5<br>South Asians: 72.2                                  | 377    | 0.7  | Diabetes, hypertension, post-MI mortality rates             | 3 |
| Khan et al, 2010 <sup>7</sup>   | Hospital Administrative data                 | British Columbia Alberta | Retrospective chart review                     | 1994–2003                           | 41 615  | 67/33                                                                             | N/A                                                                       | 2 190  | 5.4  | Smoking prevalence, revascularization rates                 | 5 |
| Khan et al, 2009 <sup>51</sup>  | N/A                                          | Ontario                  | Retrospective cohort                           | N/A                                 | 2 472   | South Asians: 78.4/ 21.6<br>White people: 62.9/ 37.1                              | South Asians: 61.7<br>White people: 64.4                                  | 171    | 6.7  | Physical activity environment                               | 3 |
| Khan et al, 2011 <sup>38</sup>  | Hospital discharge data and physician claims | British Columbia Alberta | Database review                                | BC: 1993–1996<br>Alberta: 1994–2007 | 276 237 | N/A                                                                               |                                                                           | 15 066 | 5.4  | Diabetes incidence rates                                    | 5 |
| King, 2009 <sup>8</sup>         | Hospital Discharge Abstract Database         | Calgary                  | Chart review                                   | 2002–2006                           | 406     |                                                                                   |                                                                           |        |      | BMI, diabetes, smoking rates                                | 4 |
| Kohli et al, 2013 <sup>25</sup> | M-CHAT                                       | Vancouver                | Cross-sectional                                | N/A                                 | 822     | White people: 50/50<br>Aboriginal: 48/52<br>Chinese: 46/54<br>South Asians: 50/50 | White people: 50.3<br>Aboriginal: 45<br>Chinese: 47.9<br>South Asians: 45 | 207    | 25   | Fat distribution                                            | 4 |
| Kohli et al, 2010 <sup>26</sup> | M-CHAT                                       | Vancouver                | Cross-sectional Targeted ethnic group sampling |                                     | 408     |                                                                                   |                                                                           |        |      | Abdominal fat                                               | 5 |
| Lear et al, 2003 <sup>18</sup>  | M-CHAT                                       | British Columbia         | Cross-sectional Targeted                       | N/A                                 | 69      |                                                                                   | White people: 36.5                                                        | 34     | 49   | BMI, WHR, TC, LDL-C, HDL-C,                                 | 2 |

Appendix to: Rana A, de Souza RJ, Kandasamy S, Lear SA, Anand SS. Cardiovascular risk among South Asians living in Canada: a systematic review. *CMAJ Open* 2014. DOI: 10.9778/cmajo.20130064.

Copyright © 2014 Canadian Medical Association or its licensors

|                                  |                             |                                |                                                |                                    |                             |                                            |                                                                                                          |        |      |                                                                                                                                                |   |
|----------------------------------|-----------------------------|--------------------------------|------------------------------------------------|------------------------------------|-----------------------------|--------------------------------------------|----------------------------------------------------------------------------------------------------------|--------|------|------------------------------------------------------------------------------------------------------------------------------------------------|---|
|                                  |                             |                                | ethnic group sampling                          |                                    |                             |                                            | South Asians: 38.2                                                                                       |        |      | TG, fasting glucose, fasting insulin, SBP, DBP, CRP                                                                                            |   |
| Lear et al, 2007 <sup>30</sup>   | M-CHAT                      | Vancouver                      | Cross-sectional Targeted ethnic group sampling | N/A                                | 822                         |                                            | White people: 50.3<br>South Asians: 45.0                                                                 | 207    | 25.1 | Diet, physical activity, smoking, diabetes prevalence                                                                                          | 5 |
| Lear et al, 2009 <sup>17</sup>   | M-CHAT                      | British Columbia               | Cross-sectional Targeted ethnic group sampling | N/A                                | 828                         |                                            |                                                                                                          | 208    | 25.1 | BMI, waist, WHR, body fat %                                                                                                                    | 5 |
| Lear et al, 2012 <sup>24</sup>   | M-CHAT                      | Vancouver                      | Cross-sectional Targeted ethnic group sampling | N/A                                | 408                         | 50/50                                      | White people Men: 49.8<br>White people Women: 50.7<br>South Asians Men: 44.6<br>South Asians Women: 45.4 | 207    | 51   | LDL-C, HDL-C, TC, TC:HDL                                                                                                                       | 5 |
| Liu et al, 2010 <sup>35</sup>    | CCHS 2000, 2003 and 2005    | Canada                         | Retrospective cohort                           | 3 cycles of CCHS; 2000, 2003, 2005 | 37 154                      | South Asians: 52/48<br>White people: 48/52 |                                                                                                          | 4 270  | 11   | Diabetes, Hypertension, Smoking, BMI                                                                                                           | 4 |
| He et al, 2010 <sup>41</sup>     |                             | Toronto<br>London<br>Cambridge | Cross-sectional Convenience sampling           | 2003–2006 (3 yr)                   | 354                         | South Asians: 43/57<br>White people: 49/51 | N/A                                                                                                      | 113    | 32   | BMI, waist, WHR, body fat %, SBP, DBP, TC, HDL-C, LDL-C, fasting glucose, fasting insulin, TG, hypertension, impaired fasting glucose, HOMA-IR | 4 |
| Merchant, 2005 <sup>49</sup>     | SHARE                       | Hamilton                       | Cross-sectional Random sampling                | N/A                                | 617                         | 47/53                                      | 47.72                                                                                                    | 173    | 28   | Physical activity, diet                                                                                                                        | 5 |
| Nijjar et al, 2010 <sup>13</sup> | Hospital Discharge Database | British Columbia               | Retrospective chart review                     | 1995–2002 (7 yr)                   | 2 168 715 (34848 AMI cases) | 67/33                                      | N/A                                                                                                      | 87 965 | 4.1  | AMI hospitalization rates                                                                                                                      | 4 |
| O'Laughlin et al,                |                             | Montreal                       | Retrospective                                  | 1993–1997 (4)                      | 2 033                       | 42/58                                      | 39.7                                                                                                     | 42     | 3    | Smoking, obesity, physical inactivity,                                                                                                         | 2 |

Appendix to: Rana A, de Souza RJ, Kandasamy S, Lear SA, Anand SS. Cardiovascular risk among South Asians living in Canada: a systematic review. *CMAJ Open* 2014. DOI: 10.9778/cmajo.20130064.

Copyright © 2014 Canadian Medical Association or its licensors

|                                    |                             |                                    |                                      |                   |         |                                                      |                                                      |        |      |                                                               |   |
|------------------------------------|-----------------------------|------------------------------------|--------------------------------------|-------------------|---------|------------------------------------------------------|------------------------------------------------------|--------|------|---------------------------------------------------------------|---|
| 2007 <sup>21</sup>                 |                             |                                    |                                      | yr)               |         |                                                      |                                                      |        |      | poor diet                                                     |   |
| Prasad et al., 2011 <sup>46</sup>  |                             | Toronto                            | Retrospective Cohort                 | 1998–2009 (11 yr) | 864     | South Asians: 106/11. White people: 346/204          | South Asians: 48.4, White people: 47.1               | 139    | 16.1 | Smoking status                                                | 4 |
| Quan et al, 2010 <sup>31</sup>     | APPROACH and BCCR           | Alberta British Columbia           | Database review                      | 1995–2004 (9 yr)  | 81 848  | South Asians: 77.4/22.3, White people: 75/25         | N/A                                                  | 3 061  | 3.7  | Revascularization, 30-day mortality                           | 5 |
| Razak et al, 2007 <sup>39</sup>    | SHARE                       | Toronto Edmonton Hamilton Oshweken | Cross-sectional Random sampling      | N/A               | 1 078   | South Asians: 55/45, White people: 48/52             | South Asians: 49, White people: 51                   | 289    | 27   | Obesity cut-offs                                              | 6 |
| Razak et al, 2005 <sup>22</sup>    | SHARE                       | Toronto Edmonton Hamilton Oshweken | Cross-sectional Random sampling      | N/A               | 1 251   | South Asians: 54/46, White people: 48/52             | South Asians: 49.3, White people: 51.3               | 328    | 59   | Waist, TC:HDL                                                 | 6 |
| Raghavan et al, 2008 <sup>32</sup> |                             | Montreal                           | Chart Review                         | 1995–2000 (5 yr)  | 130     | 92/8                                                 | 59.7                                                 | 65     | 50   | Short and long-term mortality                                 | 4 |
| Shah et al, 2013 <sup>40</sup>     | MOHLTC databases            | Ontario                            | Prospective cohort                   | 2002–2009 (7 yr)  | 491 243 | White people:52/48, South Asians:56/44, Chines:54/46 | White people:58.3, South Asians: 51.6, Chinese: 56.5 | 22 342 | 4.5  | Age at diagnosis of diabetes                                  | 5 |
| Sheth et al, 1999 <sup>15</sup>    | Canadian mortality database | Canada                             | Retrospective cohort                 | 1979–1993         | 949 859 |                                                      |                                                      | 6 548  | 0.68 | CVD mortality rates                                           | 5 |
| Singh et al, 2005 <sup>57</sup>    | Hospital chart review       | Toronto                            | Retrospective cohort                 | 1997–1999 (2 yr)  | 887     | South Asians: 51/49, Non-South Asians: 50/50         | South Asians: 69.1, Non-South Asians: 75.1           | 90     | 12   | Smoking, post-MI mortality rates                              | 3 |
| Smith et al, 2006 <sup>23</sup>    |                             | Montreal                           | Cross-sectional Convenience sampling | 2004–2005 (1 yr)  | 165     | 52/48                                                |                                                      | 82     | 50   | BMI, body fat %, WHR, Waist, TC, HDL-C, TC:HDL-C, ApoB/ApoA1, | 3 |

Appendix to: Rana A, de Souza RJ, Kandasamy S, Lear SA, Anand SS. Cardiovascular risk among South Asians living in Canada: a systematic review. *CMAJ Open* 2014. DOI: 10.9778/cmajo.20130064.

Copyright © 2014 Canadian Medical Association or its licensors

|                                                                                                                                                                                                                                                                                                                                                                                                                                                                                                                                                                                                                                                                                                                                                                                                                                                                                                                    |     |          |                                            |                         |     |                                                 |                                                   |    |    |                                    |   |
|--------------------------------------------------------------------------------------------------------------------------------------------------------------------------------------------------------------------------------------------------------------------------------------------------------------------------------------------------------------------------------------------------------------------------------------------------------------------------------------------------------------------------------------------------------------------------------------------------------------------------------------------------------------------------------------------------------------------------------------------------------------------------------------------------------------------------------------------------------------------------------------------------------------------|-----|----------|--------------------------------------------|-------------------------|-----|-------------------------------------------------|---------------------------------------------------|----|----|------------------------------------|---|
|                                                                                                                                                                                                                                                                                                                                                                                                                                                                                                                                                                                                                                                                                                                                                                                                                                                                                                                    |     |          |                                            |                         |     |                                                 |                                                   |    |    | smoking status,<br>fasting glucose |   |
| Smith et al,<br>2006 <sup>16</sup>                                                                                                                                                                                                                                                                                                                                                                                                                                                                                                                                                                                                                                                                                                                                                                                                                                                                                 |     | Montreal | Cross-sectional<br>Convenience<br>sampling | 2004–<br>2005 (1<br>yr) | 114 | 61/39                                           |                                                   | 65 | 57 | ApoB, ApoA1,<br>diabetes           | 3 |
| Trop et al,<br>2014 <sup>33</sup>                                                                                                                                                                                                                                                                                                                                                                                                                                                                                                                                                                                                                                                                                                                                                                                                                                                                                  | N/A | Toronto  | Prospective<br>cohort                      | 2008–<br>2010           | 37  | South<br>Asians:76.5/23.5<br>White people:80/20 | South<br>Asians:<br>61.4 White<br>people:<br>63.5 | 17 | 46 | Diabetes, Smoking                  | 3 |
| <p>BMI: Body Mass Index, WHR: Waist-to-hip ratio, HOMA-IR: Homeostatic Model Assessment- Insulin Resistance, SBP: Systolic Blood Pressure, DBP: Diastolic Blood Pressure, HDL-C: High Density Lipoprotein- Cholesterol, LDL-C: Low Density Lipoprotein-Cholesterol, TC: Total Cholesterol, TC:HDL-C: Ratio of Total Cholesterol to High Density Lipoprotein-Cholesterol, TG: Triglycerides. SHARE: Study of Health Assessment and Risk in Ethnic groups, APPROACH: Alberta Provincial Project for Outcome Assessment in Coronary Heart disease, NPHS: National Population Health Survey, CCHS: Canada Community Health Survey, TNH: Toronto Nutrigenomics and Health Study, BCCR: British Columbia Cardiac Registry, M-CHAT: Multicultural Community Health Assessment Trial, ACTFAST: Achieve Cholesterol Targets Fast with Atorvastatin Stratified Titration, MOHLTC: Ministry of Health and Long-term Care.</p> |     |          |                                            |                         |     |                                                 |                                                   |    |    |                                    |   |
