# Supplementary material
Source: PubMed Central journal article supplement (PMC4183167)
Supplement: supp_2.3.E183_2013-0064_original_submission.pdf [file supp_2.3.E183_2013-0064_original_submission.pdf]

## Cardiovascular Risk in South Asians Living in Canada: A Systematic Review

|                               |                                                                                                                                                                                                                                                                                                                                                                                                                                                                                                                                                                                                                                                                                                                                                                                                                                                                                                                                                                                                                                                                                                                                                                                                                                                                                                                                                                                                                                                                                                                                                                                                                          |
|-------------------------------|--------------------------------------------------------------------------------------------------------------------------------------------------------------------------------------------------------------------------------------------------------------------------------------------------------------------------------------------------------------------------------------------------------------------------------------------------------------------------------------------------------------------------------------------------------------------------------------------------------------------------------------------------------------------------------------------------------------------------------------------------------------------------------------------------------------------------------------------------------------------------------------------------------------------------------------------------------------------------------------------------------------------------------------------------------------------------------------------------------------------------------------------------------------------------------------------------------------------------------------------------------------------------------------------------------------------------------------------------------------------------------------------------------------------------------------------------------------------------------------------------------------------------------------------------------------------------------------------------------------------------|
| Journal:                      | <i>CMAJ</i>                                                                                                                                                                                                                                                                                                                                                                                                                                                                                                                                                                                                                                                                                                                                                                                                                                                                                                                                                                                                                                                                                                                                                                                                                                                                                                                                                                                                                                                                                                                                                                                                              |
| Manuscript ID:                | CMAJ-13-1139                                                                                                                                                                                                                                                                                                                                                                                                                                                                                                                                                                                                                                                                                                                                                                                                                                                                                                                                                                                                                                                                                                                                                                                                                                                                                                                                                                                                                                                                                                                                                                                                             |
| Manuscript Type:              | Research - Meta-analysis/systematic review                                                                                                                                                                                                                                                                                                                                                                                                                                                                                                                                                                                                                                                                                                                                                                                                                                                                                                                                                                                                                                                                                                                                                                                                                                                                                                                                                                                                                                                                                                                                                                               |
| Date Submitted by the Author: | 26-Jul-2013                                                                                                                                                                                                                                                                                                                                                                                                                                                                                                                                                                                                                                                                                                                                                                                                                                                                                                                                                                                                                                                                                                                                                                                                                                                                                                                                                                                                                                                                                                                                                                                                              |
| Complete List of Authors:     | Rana, Ayesha; McMaster University, Department of Clinical Epidemiology & Biostatistics<br>de Souza, Russell; McMaster University, Department of Clinical Epidemiology & Biostatistics<br>Kandasamy, Sujane; McMaster University, Department of Clinical Epidemiology & Biostatistics<br>Lear, Scott; Simon Fraser University, Health Sciences & Medicine<br>Anand, Sonia Savitri; McMaster University, Medicine & Epidemiology                                                                                                                                                                                                                                                                                                                                                                                                                                                                                                                                                                                                                                                                                                                                                                                                                                                                                                                                                                                                                                                                                                                                                                                           |
| Keywords:                     | Cardiac Disease, Coronary, Diabetes, Systematic Review, Epidemiology, Endocrinology and Metabolism, Hypertension                                                                                                                                                                                                                                                                                                                                                                                                                                                                                                                                                                                                                                                                                                                                                                                                                                                                                                                                                                                                                                                                                                                                                                                                                                                                                                                                                                                                                                                                                                         |
| More Detailed Keywords:       | Ethnicity, South Asian, Cholesterol, Body fat, Cardiovascular risk                                                                                                                                                                                                                                                                                                                                                                                                                                                                                                                                                                                                                                                                                                                                                                                                                                                                                                                                                                                                                                                                                                                                                                                                                                                                                                                                                                                                                                                                                                                                                       |
| Abstract:                     | <p>Background: Almost a million people of South Asian (SA) origin live in Canada, representing about 3% of the total Canadian population. Accumulating evidence demonstrates that SA immigrants living in Canada have a higher burden of certain cardiovascular risk factors and cardiovascular disease (CVD), compared to White Caucasians (WC). Objectives: To comprehensively review the body of literature describing the cardiovascular risk and management profile of adult SA living in Canada.</p> <p>Methods: We searched MEDLINE, EMBASE, Cochrane and CINAHL databases and reference list of articles from inception through May 31, 2012. English language studies of interventions, or direct or observational studies of biological or patho-physiological mechanisms underlying CVD risk in SA conducted in Canada were eligible for inclusion. Where appropriate, we used random-effects meta-analyses to pool the study results comparing the CVD risk profiles of SA and WC.</p> <p>Results: 52 articles were included in this review. Compared with WC, SA in Canada had higher prevalence and incidence rates of CVD, increased prevalence of diabetes [OR=2.00(95%CI: 1.91,2.09;p&lt;0.001)] and hypertension [OR: 1.15(95%CI: 1.06, 1.26,p=0.001)], lower HDL-C levels [MD:-0.19 mmol/L(95%CI:-0.26,-0.12,p&lt;0.001)] and a higher body fat % [Men:3.23%(95% CI:0.83%,5.62%;p=0.008); Women:4.09%(95%CI:3.46%,4.72%; p &lt; 0.00001)]. SA were less likely to smoke tobacco [OR 0.33, (95% CI:0.25,0.44; p&lt;0.001)] were more sedentary, and consumed higher carbohydrate diets than WC. No</p> |

1  
2  
3  
4  
5  
6  
7  
8  
9  
10  
11  
12  
13  
14  
15  
16  
17  
18  
19  
20  
21  
22  
23  
24  
25  
26  
27  
28  
29  
30  
31  
32  
33  
34  
35  
36  
37  
38  
39  
40  
41  
42  
43  
44  
45  
46  
47  
48  
49  
50  
51  
52  
53  
54  
55  
56  
57  
58  
59  
60

|  |                                                                                                                                                                                                                                                                                            |
|--|--------------------------------------------------------------------------------------------------------------------------------------------------------------------------------------------------------------------------------------------------------------------------------------------|
|  | differences in access to diagnostic tests, outcomes following cardiovascular surgery, or utilization of cardiac rehabilitation programs were apparent. Interpretation: SA living in Canada have a higher prevalence and incidence of CVD and possess a unique cardiovascular risk profile. |
|  |                                                                                                                                                                                                                                                                                            |

SCHOLARONE™  
Manuscripts

Confidential

1  
2  
3 Cardiovascular Risk in South Asians Living in Canada: A  
4  
5 Systematic Review.  
6

7  
8 Ayesha Rana<sup>\*1,2</sup>, Russell J de Souza<sup>\*1,2,3,4</sup>, Sujane Kandasamy<sup>1,2</sup>, Scott  
9  
10 A. Lear<sup>5,6</sup>, Sonia S. Anand<sup>1,2,7</sup>  
11

12  
13 <sup>1</sup> Department of Clinical Epidemiology & Biostatistics, Faculty of  
14  
15 Health Sciences, McMaster University, Hamilton, ON  
16

17  
18 <sup>2</sup> Chanchlani Research Centre, Department of Medicine, Faculty of  
19  
20 Health Sciences, McMaster University, Hamilton, ON  
21

22  
23 <sup>3</sup> Clinical Nutrition and Risk Factor Modification Center, St.  
24  
25 Michael's Hospital, Toronto, ON  
26

27  
28 <sup>4</sup> Department of Nutritional Sciences, University of Toronto,  
29  
30 Toronto, ON  
31

32  
33 <sup>5</sup> Faculty of Health Sciences, Simon Fraser University, Burnaby,  
34  
35 British Columbia, Canada  
36

37  
38 <sup>6</sup> Division of Cardiology, Department of Medicine, University of  
39  
40 British Columbia, Vancouver, British Columbia, Canada  
41

42  
43 <sup>7</sup> Population Health Research Institute, Hamilton Health Sciences,  
44  
45 McMaster University  
46

47  
48  
49  
50  
51 \* Both authors contributed equally to this work  
52  
53  
54  
55  
56  
57  
58  
59  
60

1  
2  
3 **Corresponding Author:**  
4

5  
6 Dr. Sonia S. Anand  
7

8 McMaster University  
9

10 1280 Main St. W.  
11

12 MDCL-3204  
13

14 Hamilton, ON L8N 3Z5  
15

16 905 527 4322 x 21523  
17

18 [anands@mcmaster.ca](mailto:anands@mcmaster.ca)  
19  
20  
21  
22  
23

24 **Number of Figures:** 23  
25

26 **Number of Tables:** 1  
27  
28

29 **Running Title:** Cardiovascular risk in Canadian South Asians  
30  
31

32 **Abstract Word Count:** 438  
33  
34

35 **Manuscript Word Count:** 7501  
36  
37  
38  
39  
40  
41  
42  
43  
44  
45  
46  
47  
48  
49  
50  
51  
52  
53  
54  
55  
56  
57  
58  
59  
60

1  
2  
3 **Conflict of interest:** None declared  
4  
5  
6  
7  
8  
9  
10  
11  
12  
13  
14  
15  
16  
17  
18  
19  
20  
21  
22  
23  
24  
25  
26  
27  
28  
29  
30  
31  
32  
33  
34  
35  
36  
37  
38  
39  
40  
41  
42  
43  
44  
45  
46  
47  
48  
49  
50  
51  
52  
53  
54  
55  
56  
57  
58  
59  
60

Confidential

## ABSTRACT

Background: Almost a million people of South Asian origin live in Canada, representing about 3% of the total Canadian population. Accumulating evidence demonstrates that South Asian immigrants living in Canada have a higher burden of certain cardiovascular risk factors and cardiovascular disease (CVD), compared to White Caucasians living in Canada.

Objectives: To comprehensively review the body of literature describing the cardiovascular risk and management profile of adult South Asians living in Canada, and to highlight future areas of study.

Methods: We searched MEDLINE, EMBASE, Cochrane and CINAHL databases and reference list of articles from inception through May 31, 2012. Three authors independently assessed study quality and extracted data. Study authors were contacted for additional information. English language studies of interventions, or direct or observational studies of biological or patho-physiological mechanisms underlying CVD risk in South Asians conducted in Canada were eligible for inclusion. We used random-effects meta-analyses to pool the study results comparing the CVD risk profiles of South Asians and Caucasians. If three or more studies provided data, prevalence odds or mean differences were pooled using random-effects meta-analyses.

Results: 52 articles were included in this review. Compared with White Caucasians, South Asians in Canada had higher

1  
2  
3 prevalence and incidence rates of CVD, increased prevalence of  
4 diabetes [OR= 2.00 (95 % CI: 1.91,2.09; p<0.001)] and  
5 hypertension [OR: 1.15 (95% CI: 1.06, 1.26, p=0.001)], lower HDL-  
6 C levels [MD: -0.19 mmol/L (95% CI: -0.26, -0.12, p<0.001)] and a  
7 higher body fat percentage [Men: 3.23% (95% CI: 0.83%, 5.62%;  
8 p=0.008); Women: 4.09%, (95% CI: 3.46%, 4.72%; p < 0.00001)]. We  
9 found no differences in BMI [Men: -0.19 kg/m<sup>2</sup> (95 % CI: -1.94,  
10 1.55; p=0.83); Women: -0.09 kg/m<sup>2</sup>, (95 % CI: -1.74, 1.56,  
11 p=0.91)], LDL-C [MD: 0.08 mmol/L (95% CI: -0.17, 0.34, p=0.52)],  
12 waist circumference [Men: 0.14 cm, (95% CI: -3.59, 3.88; p=0.94);  
13 Women [MD: 0.48 cm, (95% CI: -3.21, 4.16; p=0.80)], diastolic  
14 blood pressure [MD: -1.05 (95% CI: -5.79, 3.68; p=0.66)] or  
15 systolic blood pressure [MD: -1.80 mmHg (95% CI: -4.19, 0.58;  
16 p=0.14)]. South Asians were less likely to smoke tobacco [OR  
17 0.33, (95% CI: 0.25, 0.44; p<0.001)] were more sedentary, and  
18 consumed higher carbohydrate diets than White Caucasians. No  
19 clear differences in access to diagnostic tests (angiography or  
20 cardiac catheterization), outcomes following cardiovascular  
21 surgery, or utilization of cardiac rehabilitation programs were  
22 apparent.  
23  
24  
25  
26  
27  
28  
29  
30  
31  
32  
33  
34  
35  
36  
37  
38  
39  
40  
41  
42  
43

44 Interpretation: South Asians living in Canada have a higher  
45 prevalence and incidence of CVD and possess a unique  
46 cardiovascular risk profile characterized by a propensity to  
47 diabetes, excess adiposity, low HDL cholesterol, higher sedentary  
48 behaviours, higher carbohydrate intake, and lower smoking  
49 compared to White Caucasians. Access to diagnostic tests for  
50  
51  
52  
53  
54  
55  
56  
57  
58  
59  
60

1  
2  
3  
4  
5  
6  
7  
8  
9  
10  
11  
12  
13  
14  
15  
16  
17  
18  
19  
20  
21  
22  
23  
24  
25  
26  
27  
28  
29  
30  
31  
32  
33  
34  
35  
36  
37  
38  
39  
40  
41  
42  
43  
44  
45  
46  
47  
48  
49  
50  
51  
52  
53  
54  
55  
56  
57  
58  
59  
60

coronary artery disease, and outcomes after myocardial infarction appear similar.

Abstract word count: 438

Confidential



## INTRODUCTION

South Asians (SA) are individuals whose ancestors originate from the Indian subcontinent, including India, Pakistan, Sri Lanka, Nepal, and Bangladesh. According to the 2006 Census Canada data, almost a million people of South Asian origin live in Canada, representing about 3% of the total Canadian population(1). Of this, approximately 70% were born outside Canada, 75% of whom immigrated to Canada in the last twenty years (1). SA immigrants living in Canada have higher cardiovascular disease (CVD) rates compared to the general population (2-4), and these differences appear to persist among the offspring of SA immigrants living in Canada(5). SA also have more severe CVD, present with disease at younger ages, and in some contexts have differential access to diagnostic and treatment services compared to non-SA(6-8).

In the last two decades, there have been numerous studies of CV risk factors or CVD conducted among SA living in Canada. The evidence to date suggests that CVD rates and health behaviours vary between ethnic groups in Canada, and that the adoption of some health behaviours typical of Western countries may promote the development of cardio-metabolic risk factors among SA. This paper will systematically review the literature comparing SA with White Caucasians (WC) living in Canada with respect to CVD risk factors, management, access to diagnostic testing, and adherence to cardiac rehabilitation programs.

## METHODS

### Search Strategy and Selection

In consultation with an information specialist, we developed search terms for MEDLINE, EMBASE, CINAHL and Cochrane Registry databases from inception through May 24, 2012 (**Appendix 1**). All studies were conducted in humans, and all study designs were eligible for inclusion as long as they described the association between South Asian ethnicity, established or novel CVD risk factors, or CVD. We included English language studies of interventions, or direct or observational studies of biological or patho-physiological mechanisms underlying coronary heart disease (CHD) risk in SA, conducted in Canada. Three investigators (AR, RdS, and SSA) assessed appropriateness of each article for inclusion in this review. Disagreements were resolved by discussion and consensus. We excluded studies that were not published as full reports, such as conference abstracts and letters to the editors.

### Data extraction

Three reviewers (AR, RdS, SK) extracted the following data from the studies: 1) study design (e.g. RCT, prospective cohort, cross-sectional, etc.); 2) location of conduct; 3) major research question(s); 4) sample size; 5) mean age of sample; 6) sex; 7) ethnicity; 8) anthropometry measures reported; 9) health status of participants (e.g. healthy, CVD, diabetes, etc.); 10) description and duration of intervention or exposure and follow-up; 11) primary outcomes 12) means and standard deviations for continuous outcomes and numbers of events, odds ratios (OR), and

1  
2  
3 95% confidence intervals for dichotomous outcomes. Missing  
4  
5 variance measures were imputed using standard formulae(9).  
6  
7

### 8 Quality Assessment and Meta-analysis 9

10  
11 Three reviewers (AR, RdS, SK) assessed the quality of the  
12  
13 included studies using the modified Newcastle-Ottawa scale (NOS)  
14  
15 that has been developed to assess the quality of non-randomized  
16  
17 studies<sup>8</sup>. Each study could be assigned a maximum score of 7, 1  
18  
19 point for each of the following criteria: research design,  
20  
21 recruitment strategy, sample representativeness, response rate,  
22  
23 outcome measures, power calculation and statistical analyses.  
24  
25

26  
27 Random-effects meta-analysis was conducted using Cochrane's  
28  
29 Review Manager 5.2 for the following risk factors: systolic blood  
30  
31 pressure (SBP), diastolic blood pressure (DBP), total cholesterol  
32  
33 (TC), low density lipoprotein cholesterol (LDL-C), high density  
34  
35 lipoprotein cholesterol (HDL-C), triglycerides (TG), body mass  
36  
37 index (BMI), physical inactivity, body fat %, waist to hip ratio  
38  
39 (WHR), fasting insulin (fINS), fasting glucose (FG), Homeostasis  
40  
41 Model of Assessment - Insulin Resistance (HOMA-IR), and  
42  
43 prevalence odds of smoking, diabetes, hypertension and obesity.  
44  
45 We qualitatively assessed the following outcomes: prevalence,  
46  
47 incidence of CVD, prevalence of impaired fasting glucose (IFG),  
48  
49 impaired glucose tolerance (IGT), lipoprotein (a), apolipoprotein  
50  
51 B/ apolipoprotein A, C-reactive protein (CRP), plasminogen  
52  
53 activator inhibitor-1 (PAI-1), diet intake, and management of  
54  
55 CVD.  
56  
57  
58  
59  
60

1  
2  
3 When more than three studies reported either mean differences or  
4 an odds ratio (OR) for a given outcome, we used the generic  
5 inverse variance method to pool effects and standard errors.  
6  
7 Mean difference (MD) and 95% CI was the effect measure for  
8 continuous outcomes and the prevalence OR and 95% CIs was the  
9 effect measure for the dichotomous outcomes. A negative mean  
10 difference, or OR <1.0 indicates lower levels or prevalence in  
11 SA. Age- and sex adjusted means and OR were preferred, when  
12 available. Cochran's Q statistic was used to detect  
13 heterogeneity, and the I<sup>2</sup> statistic was used to estimate the  
14 percentage of variation across studies that arose from true  
15 heterogeneity rather than chance(9). If the original data were  
16 not amenable to meta-analysis, for example, in the case of non-  
17 normal data, or when less than three studies were available, we  
18 summarized the study results as percent prevalence, incidence  
19 rates, medians and interquartile range (IQR) or means ± SD.  
20  
21 We conducted pre-planned sensitivity analyses in which we  
22 included only high quality studies to test the robustness of the  
23 effect sizes and to evaluate heterogeneity. A high quality study  
24 was defined as one that had rigorous design and scored 5 or  
25 higher on the modified Newcastle-Ottawa scale(10). We also  
26 conducted post-hoc subgroup analyses by study type and sampling  
27 mechanism to identify the causes of heterogeneity in results.  
28  
29  
30  
31  
32  
33  
34  
35  
36  
37  
38  
39  
40  
41  
42  
43  
44  
45  
46  
47  
48  
49  
50

## 51 RESULTS

### 52 Literature Flow

1  
2  
3 Our search of the electronic databases identified 18,057  
4  
5 potentially relevant articles. A total of 17,975 were excluded  
6  
7 after abstract review leaving 82 retrieved for full text review.  
8  
9 After full-text review, 52 articles were included (**Figure 1**).

### 10 11 12 Study Characteristics

13  
14  
15 The 52 included studies encompassed a wide range of accrual years  
16  
17 (1979 to 2007) and various study designs. Twenty-seven were  
18  
19 cross-sectional (52%), twenty-two were retrospective  
20  
21 chart/database reviews (42%), one was a case-control study (2%)  
22  
23 and two were qualitative studies (4%). The sample size ranged  
24  
25 from 51 to 1276 in the cross-sectional studies, from 645 to  
26  
27 2,168,715 in the database reviews, and from 16 to 130 in other  
28  
29 studies. A full description of study characteristics can be  
30  
31 found in **Table 1**.

### 32 33 34 Summary of Findings

#### 35 36 37 Prevalence and Incidence of Heart Disease

38  
39  
40 Three observational studies compared the prevalence and incidence  
41  
42 of CVD in Canadian SA with WC, one used a random population based  
43  
44 sampling technique (SHARE)(2) whereas the others used record  
45  
46 linkage in existing databases(3,11,12).

47  
48  
49 The Study of Health Assessment and Risk in Ethnic groups (SHARE;  
50  
51 n=946)(2), randomly sampled SA and WC from three cities in Canada  
52  
53 between 1997-2000. The age and sex standardized prevalence of CVD  
54  
55 [defined as a history of myocardial infarction (MI), angina,  
56  
57  
58  
59  
60

1  
2  
3 silent MI, percutaneous transluminal coronary angioplasty (PTCA),  
4 coronary artery bypass grafting (CABG) or stroke] was 10.7 % in  
5 SA as compared to 5.4% in WC ( $p < 0.05$ ).  
6  
7  
8  
9

10 In a retrospective database analysis of National Population  
11 Health Survey (NPHS) and Canada Community Health Survey (CCHS)  
12 covering years 1996 to 2007, Chiu et al used record linkage (3)  
13 (n=163,797) restricted to the province of Ontario. The age and  
14 sex standardized self-reported prevalence of heart disease (SA:  
15 5.2% vs. WC: 5.1%,  $p > 0.05$ ) or stroke (SA: 1.7 vs. WC:1.1,  $p > 0.05$ )  
16 or combined heart disease or stroke (SA: 6.6 % vs. WC: 5.7 %,  
17  $p = 0.22$ ) was higher but was not significantly different among SA  
18 compared to WC. This study scored lower on the NOS scale (NOS<5)  
19 and ethnicity and clinical outcomes were self-reported.  
20  
21  
22  
23  
24  
25  
26  
27  
28  
29  
30

31 Using self-reported ethnicity, a retrospective cohort study of  
32 hospital administrative databases (1994 - 2003) in British  
33 Columbia (B.C.) (11) reported a higher age standardized incidence  
34 rate (/1000/year) of acute MI in SA men and women (SA Men: 4.97  
35 vs. WC Men: 3.29,  $p < 0.001$ ; SA Women: 2.35 vs. WC Women: 1.53,  
36  $p = 0.01$ ). Additionally, SA men had higher rates of acute MI at  
37 earlier ages than WC men. The age-specific incidence in 35-44  
38 year old men was 0.89 (95% CI: 0.71,1.07) for SA and 0.48 (95%  
39 CI: 0.45, 0.51) for WC ( $p < 0.001$ ). In the 45-54 year age group,  
40 these rates were also higher 3.44 (95% CI: 3.04, 3.83) among SA  
41 men than WC men 1.77 (95% CI: 1.71, 1.83;  $p < 0.001$ ).  
42  
43  
44  
45  
46  
47  
48  
49  
50  
51  
52  
53  
54  
55  
56  
57  
58  
59  
60

1  
2  
3 The mortality rates from CVD in SA and WC(12) were reported in a  
4 retrospective review of the Canadian mortality database (1979-  
5 1993). Here, SA were reported to have significantly higher age  
6 standardized proportional rates of mortality from CVD than WC  
7 (Men: 42% vs. 29%;  $p < 0.001$ , Women: 29% vs. 19%;  $p < 0.001$ ).  
8  
9

10  
11  
12 Taken together the evidence suggests that SA in Canada have a  
13 higher prevalence and of CVD as compared to non-South Asians.  
14 Furthermore, between 1997-2003, SA appeared to have significantly  
15 higher rates of mortality from CHD.  
16  
17  
18  
19  
20  
21

#### 22 BMI and Abdominal Obesity (Waist circumference and Waist-to-hip 23 ratio) 24 25 26

27  
28 Four cross-sectional studies(2,13-15) of 725 SA and 699 WC  
29 compared the sex specific body mass index (BMI) among SA and WC.  
30 Overall the mean difference for BMI was not significantly  
31 different in the two groups for men [MD:  $-0.19 \text{ kg/m}^2$  (95 % CI: -  
32 1.94, 1.55;  $p = 0.83$ ;  $I^2 = 82\%$ ;  $P_{het} = 0.001$ )] and women [MD:  $-0.09$   
33  $\text{kg/m}^2$  (95 % CI:  $-1.74, 1.56$ ;  $p = 0.91$ ;  $I^2 = 73\%$ ;  $P_{het} = 0.01$ )]. When  
34 this analysis was limited to the two high quality studies(2,14),  
35 the mean difference in BMI was  $-1.11 \text{ kg/m}^2$  (95% CI:  $-3.66, 1.44$ ;  
36  $p = 0.39$ ;  $I^2 = 89\%$ ;  $P_{het} = 0.003$ ) in men, and  $-0.52 \text{ kg/m}^2$  (95% CI: -  
37 1.51, 0.48;  $p = 0.31$ ;  $I^2 = 0\%$ ;  $P_{het} = 0.33$ ) in women. When we  
38 conducted secondary subgroup analyses by sampling method used in  
39 the study (i.e. convenience versus random), heterogeneity was  
40 eliminated ( $I^2 < 20\%$ ) within each subgroup, indicating that the  
41 high heterogeneity in the MD in BMI for men could be explained by  
42  
43  
44  
45  
46  
47  
48  
49  
50  
51  
52  
53  
54  
55  
56  
57  
58  
59  
60

1  
2  
3 the variation in sampling techniques (p for test for subgroup  
4 differences < 0.0001; Fig 2).  
5  
6

7  
8 Three low-quality studies(4,7,16) that used record linkage  
9 reported the prevalence of obesity (BMI  $\geq$  30 kg/m<sup>2</sup>) as determined  
10 by self-reported weight and height in 3,507 SA and 1,552 WC. The  
11 pooled OR was 0.62 (95% CI: 0.40, 0.96; p=0.03;  $I^2$ = 40%;  $P_{het}$   
12 =0.19) indicating lower prevalence of obesity in SA, using the  
13 conventional BMI cut-off of  $\geq$  30 kg/m<sup>2</sup>.  
14  
15  
16  
17  
18  
19

20  
21 Five cross-sectional studies(2,13-15,17) compared waist-to-hip  
22 ratio (WHR) among 812 SA and 753 WC. Overall, the mean  
23 difference for men was not significant [MD: 0.02 (95 % CI: -0.01,  
24 0.04; p=0.15)  $I^2$ = 85%;  $P_{het}$  <0.001]; although there was  
25 substantially heterogeneity between studies. The mean difference  
26 for WHR in women was 0.02 (95% CI: 0.01, 0.04; p=0.005;  $I^2$ = 81%;  
27  $P_{het}$  <0.001), which suggests that WHR is higher in SA women as  
28 compared to WC women. Again significant heterogeneity across  
29 studies is observed. When limited to three high quality  
30 studies(2,14,17), the difference remained non-significant for men  
31 [MD: 0.00 (95% CI: -0.01, 0.01; p=0.92;  $I^2$  = 3%;  $P_{het}$  = 0.36)] and  
32 the mean WHR difference appeared marginally significant for women  
33 0.03 (95% CI: 0.00, 0.05; p=0.04;  $I^2$  =89%;  $P_{het}$  <0.001). When we  
34 conducted subgroup analyses by sampling mechanism (i.e. random  
35 vs. non-random; Fig 5) for WHR in women, heterogeneity was  
36 eliminated ( $I^2$  = 21%) within each subgroup, suggesting that  
37 sampling mechanism was a source of heterogeneity (p for subgroup  
38 groups differences <0.0002).  
39  
40  
41  
42  
43  
44  
45  
46  
47  
48  
49  
50  
51  
52  
53  
54  
55  
56  
57  
58  
59  
60



1  
2  
3 Five studies (14,15,17-19) examined the differences in waist  
4 circumference in the two ethnic groups. These studies showed no  
5 significant differences in waist for men [MD: 0.14 cm, (95% CI: -  
6 3.59, 3.88;  $p=0.94$ )  $I^2= 89\%$ ;  $P_{het} <0.001$ ] or women [MD: 0.48 cm,  
7 (95% CI: -3.21, 4.16;  $p=0.80$ )  $I^2= 87\%$ ;  $P_{het} <0.001$ ]. When limited  
8 to three high-quality studies (2,14,17), the difference remained  
9 non-significant in both men [MD: -2.18 cm, (95% CI: -5.89, 1.53;  
10  $p=0.25$ )  $I^2= 89\%$ ;  $P_{het} =0.0001$ ] and women [MD: -1.08 cm, (95% CI: -  
11 4.55, 2.40;  $p=0.54$ )  $I^2= 86\%$ ;  $P_{het} <0.001$ ].  
12  
13  
14  
15  
16  
17  
18  
19  
20  
21

22 There were a total of three cross-sectional studies (13,14,17),  
23 which compared sex specific percent body fat in 346 SA and 337  
24 WC. When compared to WC men and women, body fat was 3.23% higher  
25 in SA men (95% CI: 0.83, 5.62;  $p=0.008$ ;  $I^2= 87\%$ ;  $P_{het} <0.001$ ) and  
26 4.09% higher in SA women (95% CI: 3.46, 4.72;  $p < 0.00001$ ;  $I^2=$   
27 6%;  $P_{het} = 0.35$ ). When limited to two high quality studies (14,17),  
28 the mean difference for men was 2.93% (95% CI: -0.29, 6.16;  $p$   
29 =0.07;  $I^2= 91\%$ ;  $P_{het} <0.001$ ) and 4.05% in women (95% CI: 3.56,  
30 4.54;  $p<0.0001$ ;  $I^2= 0\%$ ;  $P_{het} <0.45$ ). Again, subgroup analyses for  
31 percent body fat in men showed that heterogeneity might be  
32 associated with the sampling mechanism used in the studies ( $I^2$   
33 within each subgroup  $< 10\%$ ;  $p$ -value for test for subgroup  
34 differences  $< 0.0001$ ; Fig 8).  
35  
36  
37  
38  
39  
40  
41  
42  
43  
44  
45  
46  
47  
48

49 Hence, even with similar BMIs, SA have higher percent body fat  
50 and SA women have higher WHR when compared to White Caucasians.  
51 It is noteworthy that the mean waist circumference in SA men was  
52 higher in only one of the five studies<sup>10</sup>, which may explain the  
53  
54  
55  
56  
57  
58  
59  
60

1  
2  
3 heterogeneity in the results for WC (men). The reasons for this  
4 may relate to difference in age ranges of the study sample.  
5  
6 Smith, 2006 enrolled SA men that were much older than WC men.  
7  
8 Three studies that showed no difference in the waist  
9  
10 circumference for men recruited men with similar age ranges and  
11  
12 BMIs between the two ethnic groups. Similarly, heterogeneity in  
13  
14 the waist circumference in women may be explained by differences  
15  
16 in age ranges of the sample. Two studies that showed no  
17  
18 difference recruited men and women of similar age ranges and  
19  
20 BMIs. One study that showed lower waist circumference in SA  
21  
22 women had recruited a much younger cohort of participants as  
23  
24 compared to the other four studies. One study that showed a  
25  
26 higher waist in SA participants who were older than their WC  
27  
28 counterparts.  
29  
30  
31

### 32 Fat Distribution

33  
34  
35 Only two studies examined the differences in abdominal fat  
36  
37 distribution using imaging between SA and WC, the Multicultural  
38  
39 Community Health Assessment Trial (M-CHAT) (n= 408) and the  
40  
41 Molecular Study of Health and Risk in Ethnic Groups(17) (mol-  
42  
43 SHARE) (n=108). M-CHAT(20) compared total abdominal tissue (TAT,  
44  
45  $\text{cm}^2$ ) in SA and WC. Overall, SA men had higher mean TAT than WC  
46  
47 men ( $439.7 \pm 169.5$  vs.  $369.1 \pm 164.0$ ;  $p=0.003$ ). TAT was not  
48  
49 significantly different in SA and WC women ( $454.3 \pm 162.9$  vs.  $438.4$   
50  
51  $\pm 184.7$ ,  $p=0.420$ ).  
52  
53  
54

### 55 *Visceral and Subcutaneous Abdominal Fat*

56  
57  
58  
59  
60

1  
2  
3  
4  
5 In M-CHAT(20), compared to WC men, SA men had higher median  
6 visceral adipose tissue (VAT, cm<sup>2</sup>) (140.3, IQR: 101.7, 177.2 vs.  
7 104.9, IQR: 81.0, 144.5; p= 0.002). The differences in unadjusted  
8 median VAT for women in the two groups were not significant  
9 (101.8, IQR: 74.4, 126.8 vs. 98.0, IQR: 67.5, 136.2; p= 0.52).  
10  
11 However, when adjusted for age, income, smoking status,  
12 menopausal status and BMI, SA women had significantly higher VAT  
13 than WC women (p=0.025). In this study SA men had higher median  
14 subcutaneous abdominal adipose tissue (SAT, cm<sup>2</sup>) than WC men  
15 (283.2, IQR: 208.5, 363.1 vs. 221.5, IQR: 171.6, 296.3; p=0.006),  
16 although the difference in SAT were not significant in women  
17 (339.3, IQR: 238.3, 433.2 vs. 332.1, IQR: 214.1, 416.7; p=0.243).  
18  
19 However, when the SAT values were adjusted for age, income,  
20 smoking status, menopausal status and BMI, SA women had higher  
21 SAT than WC women (p=0.01).  
22  
23  
24  
25  
26  
27  
28  
29  
30  
31  
32  
33  
34  
35  
36  
37

38 In mol-SHARE(17), in which SA and WC subjects were matched by  
39 BMI, no difference in VAT between SA and WC, overall (126.8± 6.1  
40 vs. 117.5±7.0, p>0.05) or when stratified by sex [men: 153.5±8.8  
41 vs. 134.5±12.1, p>0.05; women: 97.3±7.3 vs. 95.6±6.8, p>0.05]  
42 were observed. There were also no differences in sex-specific  
43 superficial subcutaneous fat (cm<sup>2</sup>) between ethnicities (Men:  
44 25.6±1.0 vs. 27.8±1.2, p>0.05; women: 42.2±1.4 vs. 38.6 ±0.9,  
45 p>0.05). However, when compared to WC, SA had relatively less  
46 superficial subcutaneous fat as a percentage of their total  
47 abdominal fat than WC [MD: -2.94 (95% CI: -5.56 to -0.32, p<  
48  
49  
50  
51  
52  
53  
54  
55  
56  
57  
58  
59  
60

1  
2  
3 0.05)] and SA had 17% higher deep subcutaneous and visceral fat  
4 relative to superficial subcutaneous fat [MD: 0.34 (95% CI: 0.02  
5 to 0.65;  $p < 0.05$ ]. Moreover, when compared to WC, SA had  
6 significantly greater adipocyte area [MD: 64.2 (95% CI: 24.3,  
7 104.1;  $p < 0.05$ )] and maximum adipocyte diameter [MD: 20.68 (95%  
8 CI: 7.86, 33.5;  $p < 0.05$ )].  
9  
10  
11  
12  
13  
14  
15

### 16 *Liver Fat*

17  
18  
19  
20  
21 Mol-Share(17) was the only study to compare liver fat % in SA and  
22 WC. Liver fat infiltration was significantly higher in SA [MD:  
23 7.43% (95% CI: 2.30 to 12.55;  $p < 0.05$ )].  
24  
25  
26  
27  
28  
29

### 30 Type 2 Diabetes and Impaired Glucose Tolerance

31  
32 We identified 12 (2,3,6,8,21-28) (8 database and 4 cross-  
33 sectional) studies examining the prevalence of diabetes mellitus  
34 (DM) in 16,861 SA and 633,162 WC. In the database review studies,  
35 prevalence of DM was established using the International  
36 Classification of Disease (ICD)- 10 coding. The prevalence of DM  
37 in SA was twice of that of WC [OR= 2.00 (95 % CI: 1.91,2.09;  
38  $p < 0.001$ );  $I^2 = 0\%$ ;  $P_{het} = 0.87$ ]. When we limited our analysis to  
39 the 4 high quality studies(2,6,24,27), the OR was unchanged [OR:  
40 2.00 (95% CI: 1.88, 2.11 ,  $p < 0.001$ );  $I^2 = 0\%$  ;  $P_{het} = 0.81$ ].  
41 Subgroup analyses showed that the type of study design (cross-  
42 sectional vs. database review) had no significant impact on the  
43 results ( $p$  for test for subgroup differences= 0.38) Consistent  
44 with this finding, in a chart review study, Khan, 2011(29)  
45  
46  
47  
48  
49  
50  
51  
52  
53  
54  
55  
56  
57  
58  
59  
60

1  
2  
3 reported that SA men and women (ages 35–65) had higher age-  
4 specific incidence rates of diagnosed diabetes when compared to  
5 WC men and women ( $p < 0.001$ ). Similarly, the administrative  
6 database study by Chiu et al. (30) reported that SA had a higher  
7 age adjusted crude incidence of diabetes rate/ 1000 per year when  
8 compared to WC patients (20.8 vs. 9.5). SA also developed  
9 diabetes 4.6 years sooner than their WC counterparts. The median  
10 age of diagnosis in SA was 49 years as compared to 58 years in  
11 WC. In addition, SA developed diabetes at lower BMI cut-offs.  
12 Incident rates of diabetes comparable to WC at a BMI of  $30 \text{ kg/m}^2$ ,  
13 were seen at BMI of  $< 24 \text{ kg/m}^2$  for SA. In the random population-  
14 based SHARE (18, 31), elevated fasting glucose values were observed  
15 above a BMI of  $21 \text{ kg/m}^2$  in South Asians compared to a BMI  $\geq 30$   
16 among WC.  
17  
18  
19  
20  
21  
22  
23  
24  
25  
26  
27  
28  
29  
30  
31  
32  
33

34 Five cross-sectional studies (2, 15, 17, 20, 32) compared fasting  
35 glucose (FG) levels between 811 SA and 759 WC. Overall, the mean  
36 difference was not statistically significant (MD:  $0.00 \text{ mmol/L}$ ,  
37  $95\% \text{ CI: } -0.29, 0.30$ ;  $p = 0.98$ ;  $I^2 = 96\%$ ;  $P_{het} < 0.001$ ). However, when  
38 limited to the three studies (2, 17, 20) with high quality, SA had  
39  $0.22 \text{ mmol/L}$  higher FG than WC [ $95\% \text{ CI: } 0.09, 0.34$ ;  $p = 0.0006$ ]  
40  $I^2 = 43\%$ ;  $P_{het} = 0.17$ ].  
41  
42  
43  
44  
45  
46  
47  
48

49 Five cross-sectional studies (2, 17, 20, 32, 33) reported fasting  
50 insulin levels (fINS) in 792 SA and 755 WC groups. Fasting  
51 insulin levels were, on average,  $19.88 \text{ pmol/L}$  higher in SA than  
52 in WC ( $95\% \text{ CI: } 14.20, 25.55$ ;  $p < 0.001$ ;  $I^2 = 96\%$ ;  $P_{het} < 0.001$ ). When  
53 limited to two high-quality studies (2, 17, 20), SA had  $26.45 \text{ pmol/L}$   
54  
55  
56  
57  
58  
59  
60

1  
2  
3 higher fINS than WC (95% CI: 24.37, 28.52;  $p < 0.001$ ;  $I^2 = 42\%$ ;  $P_{het} = 0.18$ ).

4  
5  
6  
7  
8 Four studies (17,32,34,35) compared HOMA-IR in 685 SA and 672 WC.  
9  
10 The mean difference was 0.88 (95% CI: 0.73, 1.02;  $p < 0.001$ ;  $I^2 = 18$   
11  
12 %;  $P_{het} < 0.30$ ) indicating increased insulin resistance in SA.  
13  
14 When limited to three high quality studies (17,34,35), the mean  
15  
16 difference remained similar [MD: 0.88 (95% CI: 0.76, 1.00,  
17  
18  $p < 0.001$ ;  $I^2 = 16\%$ ;  $P_{het} = 0.30$ )].  
19  
20

21 We identified two studies that compared IGT prevalence. Both  
22  
23 studies showed a higher prevalence of IGT in SA when compared to  
24  
25 WC. In the SHARE-pilot (21) (n=51), SA were more likely to have  
26  
27 IGT than WC [34.5% vs. 9.5%,  $p < 0.04$ ]. In the main study  
28  
29 SHARE (2), 19% of South Asians had IGT as compared to 15% WC  
30  
31 ( $p = 0.03$ ). Two studies reported the prevalence of IFG in SA and WC  
32  
33 and showed no significant difference in the two groups. He,  
34  
35 2010 (32) reported 13.3% prevalence of IFG in SA as compared to  
36  
37 12.6% in WC ( $p > 0.05$ ), whereas in the random population based  
38  
39 SHARE<sup>2</sup> the prevalence of IFG in SA trended higher than in WC  
40  
41 7.3% vs. 5.8% but the difference was not significant (7.3% vs.  
42  
43 5.8%,  $p = 0.43$ ).

44  
45  
46 Collectively, these studies suggest that SA have a higher  
47  
48 prevalence of diabetes, higher levels of fasting glucose and fINS,  
49  
50 greater prevalence of IGT, and increased insulin resistance when  
51  
52 compared to WC.  
53  
54

55  
56 Blood Pressure, Hypertension  
57  
58  
59  
60

1  
2  
3 We identified five(2,15,17,20,32) cross-sectional studies which  
4 compared DBP in 759 SA and 811 WC. Overall no difference in DBP  
5 (mmHg) between SA and WC [MD: -1.05 (95% CI: -5.79, 3.68; p=0.66)  
6  
7  $I^2= 100\%$ ;  $P_{het} <0.001$ ] was identified. However, when we limited  
8  
9 the analysis to three (2,17,20) high quality studies, SA had 1.70  
10  
11 mmHg higher DBP than WC (95% CI: 0.68, 2.71, p=0.001;  $I^2= 51\%$  ;  
12  
13  $P_{het} =0.13$ ].

14  
15  
16  
17  
18 We pooled five(2,15,17,20,32) cross-sectional studies that  
19 compared SBP in the two groups (778 SA and 811 WC). There was no  
20  
21 significant difference in SBP among the two groups [MD: -1.80  
22  
23 mmHg (95% CI: -4.19, 0.58; p=0.14)  $I^2= 81\%$  ;  $P_{het} <0.001$ ], which  
24  
25 was not altered when limited to three (2,17,20) high quality  
26  
27 studies [MD: 0.39 (CI: -1.25, 2.03; p=0.64)  $I^2= 0\%$  ;  $P_{het} =0.59$ ].

28  
29  
30  
31 We identified 12 studies(2,3,6,8,21,23,25-28,32,36) that compared  
32 prevalence of hypertension in SA and WC, nine of these were  
33  
34 database reviews that used ICD-10 codes to establish  
35  
36 hypertension. SA were more likely to have hypertension than WC  
37  
38 [OR: 1.15, 95% CI: 1.06, 1.26, p=0.001;  $I^2= 66\%$ ;  $P_{het} <0.001$ ].

39  
40  
41 With the removal of low quality studies, the OR for the  
42  
43 prevalence of hypertension was 1.18 and remained significant (95%  
44  
45 CI: 1.11, 1.26; p<0.001;  $I^2= 8\%$  ;  $P_{het} =0.36$ ](2,6,21,27). Results  
46  
47 were similar for both cross-sectional and database review studies  
48  
49 (p for test for subgroup differences: 0.51).

50  
51  
52  
53 Lipids  
54  
55  
56  
57  
58  
59  
60

1  
2  
3 Five studies (2,15,20,22,32) reported the difference in total  
4 cholesterol (TC) (mmol/L) in 834 SA and 787 WC. There was a trend  
5 toward higher TC in SA compared with WC, but the MD was not  
6 significant [MD: 0.22, 95% CI: -0.14, 0.58;  $p=0.24$ ;  $I^2= 89 \%$ ;  $P_{het}$   
7  $<0.001$ ], although there was substantial heterogeneity. Limiting  
8 to high quality studies (2,20), there remained no difference in TC  
9 between the groups (MD: 0.33, 95% CI: -0.34,1.01,  $p=0.33$ ,  $I^2=$   
10  $91\%$ ;  $P_{het} <0.001$ ). Again, significant heterogeneity was observed.  
11 A closer look at the studies reveals that the heterogeneity may  
12 be explained by differences in age ranges and body composition  
13 among the participants in the included studies. Three studies  
14 that showed a higher TC in SA enrolled men and women of similar  
15 ages. One study that showed lower TC levels in SA enrolled SA  
16 that were much older than the WC. Whereas a high quality study  
17 that showed no difference had recruited participants with similar  
18 sex ratios and BMIs between the two ethnic groups.  
19  
20  
21  
22  
23  
24  
25  
26  
27  
28  
29  
30  
31  
32  
33  
34  
35  
36

37 Four studies (2,15,20,32) measured LDL- C (mmol/L) in 755 SA and  
38 707 WC. The mean difference was not significant [MD: 0.08 mmol/L  
39 (95% CI: -0.17, 0.34,  $p=0.52$ ;  $I^2= 94\%$ ;  $P_{het} < 0.001$ )]. When the  
40 analysis was limited to two high-quality studies (2,20), the mean  
41 difference was 0.09 and approached significance (95% CI: -0.01,  
42 0.19;  $p =0.09$ ;  $I^2= 2 \%$ ;  $P_{het} =0.31$ ).  
43  
44  
45  
46  
47  
48  
49

50 Six studies (2,13,15,17,20,32) reported HDL- C (mmol/L) in 893  
51 South Asians and 861 Caucasians. The mean difference was -0.19  
52 mmol/L (95% CI: -0.26, -0.12,  $p<0.001$ ;  $I^2= 70 \%$  ;  $P_{het} <0.01$ )].  
53  
54  
55  
56 When limited to three high quality studies (2,17,20), South Asians  
57  
58  
59  
60



1  
2  
3 had significantly lower HDL levels when compared to WC [(MD: -  
4 0.15, 95% CI: -0.18, -0.11;  $p < 0.01$ ;  $I^2 = 0\%$ ;  $P_{het} = 0.96$ ).

5  
6  
7  
8 Four studies(13,17,18,20) directly compared the TC to HDL-C ratio  
9 in 763 SA and 723 WC. As predicted from the individual lipid  
10 results, SA had a higher TC:HDL-C ratio [MD: 0.72 (95% CI: 0.28,  
11 1.17,  $p = 0.002$ )  $I^2 = 89\%$ ;  $P_{het} < 0.001$ ]. When limited to high quality  
12 studies(17,18,20), the difference in TC:HDL-C ratio was 0.41 and  
13 remained significant (95% CI: 0.16, 0.67;  $p = 0.002$ ;  $I^2 = 50\%$ ;  $P_{het}$   
14 =0.14].  
15  
16  
17  
18  
19  
20  
21

22  
23 Three studies(2,17,32) compared fasting triglyceride (TG, mmol/L)  
24 levels in 511 SA and 489 Caucasians. SA had significantly higher  
25 TG than WC [MD: 0.26 (95% CI: 0.09, 0.42,  $p = 0.002$ )  $I^2 = 48\%$ ;  $P_{het}$   
26 0.11]. When we limited the analyses to two studies of high  
27 quality(2,17), the mean difference was 0.21 mmol/L and remained  
28 significant (95% CI: 0.08, 0.35,  $p = 0.002$ )  $I^2 = 17\%$ ;  $P_{het} = 0.30$ ).

29  
30  
31  
32  
33  
34  
35  
36  
37 Only one study looked at mean lipoprotein (a) in South Asians. In  
38 SHARE(2), SA had higher sex and age adjusted mean lipoprotein (a)  
39 concentrations compared to WC (34.1 v 17.3 mg/dL,  $p < .013$ ).

40  
41  
42 Moreover, the percentage of South Asians with abnormal Lp(a)  
43 values [ $>30$  mg/dL] was 50% compared to 24% in WC<sup>16</sup>.

44  
45  
46  
47  
48 One study compared the levels of apolipoprotein A-1 (Apo A1) in  
49 SA and WC. In SHARE(2), SA had lower levels of Apo A1 (g/L) than  
50 WC (1.30  $\pm$ 0.25 vs. 1.42  $\pm$ 0.28,  $p < 0.0001$ ). Two studies reported  
51 levels of apolipoprotein B (Apo B) in SA and WC. In SHARE, SA had  
52 higher levels of Apo B as compared to WC (1.08  $\pm$ 0.26 vs. 1.00  
53  
54  
55  
56  
57  
58  
59  
60

1  
2  
3  $\pm 0.25$ ,  $p=0.0002$ ) although M-CHAT(37) reported that median  
4 differences in levels of Apo B were not significant. (SA men:  
5 1.10, IQR: 0.97,1.23 vs WC men: 0.99 g/L, IQR: 0.85,1.20,  $p=$   
6 0.15; SA women: 0.95, IQR: 0.80,1.10 vs. WC women: 0.90, IQR:  
7 0.74, 1.06,  $p=0.92$ ). We identified one study that looked at the  
8 Apo B/ApoA ratio. In a study by Smith, 2006(13), ApoB/Apo A was  
9 higher in SA compared to WC men and women (Men:  $0.85\pm 0.04$  vs.  
10  $0.54\pm 0.66$ ;  $p<0.001$ ; Women:  $0.74\pm 0.04$  vs.  $0.52\pm 0.03$ ;  $p<0.001$ ).

11  
12 Collectively the evidence indicates that SA have lower HDL-C and  
13 Apo A-1 levels, and higher TC: HDL ratio, TG levels, lipoprotein  
14 (a) and Apo B levels levels when compared to WC.

#### 25 26 27 Smoking:

28  
29 We identified 14 (2,3,6-8,13,16,17,21,23,25,26,38,39) studies  
30 that reported the prevalence of current smoking in 10,264 SA and  
31 511,460 WC in Canada. Collectively SA have a 67 to 76% lower  
32 prevalence of smoking than WC [OR 0.33, (95% CI: 0.25, 0.44;  
33  $p<0.001$ )  $I^2= 89\%$ ;  $P_{het} <0.001$ ]. When the analysis was limited to  
34 high quality studies(2,17,20,38), the OR was 0.24 (95% CI: 0.18,  
35 0.33;  $p < 0.001$ )  $I^2= 0\%$  ;  $P_{het} =0.46$ ).

#### 36 37 38 39 40 41 42 43 44 45 Novel Markers of Vascular Risk

46  
47 A smaller evidence base is available for markers of inflammation  
48 and vascular endothelial function, plasminogen activator  
49 inhibitor-1 (PAI-1), homocysteine, and C-reactive protein (CRP).  
50  
51 In SHARE(2), SA had elevated levels of PAI-1 ( $17.1\pm 9.61$  vs.  
52  $5.1\pm 9.92$  units/ml;  $p=0.02$ ), homocysteine ( $11.22 \pm 3.76$  vs.

1  
2  
3 10.0±3.78  $\mu\text{mol/L}$ ;  $p<0.001$ ) when compared with WC. No significant  
4  
5 differences were reported for fibrinogen levels(40) ( $3.07\pm0.85$   
6  
7 vs.  $2.93\pm 0.86$  g/L,  $p=0.10$ ).  
8  
9

10 Three cross-sectional studies compared levels of CRP between SA  
11 and WC. In SHARE(41), SA had significantly higher CRP levels  
12  
13 ( $3.22 \pm 4.2$  vs.  $2.49\pm 3.7$  mg/L;  $p<0.001$ ). In MCHAT(42), SA had  
14  
15 higher median CRP levels (men: 1.7 vs. 0.9;  $p<0.001$  and women:  
16  
17 2.7 vs. 1.4 ;  $p=0.04$ ). However, in a small mechanistic study of  
18  
19 relatively younger participants who were matched on BMI to WC,  
20  
21 Mol- SHARE(17), sex specific CRP levels in SA were not  
22  
23 significantly different than WC (Men:  $1.66 \pm 0.33$  vs.  $2.22\pm 0.95$ ;  
24  
25 women:  $1.53\pm 0.95$  vs.  $3.14 \pm 0.7$ ).  
26  
27  
28

### 29 Socioeconomic status and Psychosocial Stress

30  
31  
32 We identified only two studies that explored the influence of  
33  
34 socioeconomic status and psychosocial stress on the relationship  
35  
36 between acculturation and cardiovascular risk factors looked in  
37  
38 SA and WC. Anand et al.(43) created a social disadvantage index  
39  
40 based on income, income sources, job type, education, employment  
41  
42 status, and marital status. In this study, SA scored higher on  
43  
44 the social disadvantage index when compared to WC (Mean  $\pm$  SE:  
45  
46  $1.53\pm 0.07$  vs.  $1.36 \pm 0.07$ ;  $p<0.001$ ). The study also showed that  
47  
48 certain CV risk factors and CVD prevalence increased with  
49  
50 increasing social disadvantage for both SA and WC (No Social  
51  
52 disadvantage: 10 %  $\pm 2.55$ , low social disadvantage: 11 %  $\pm 3.25$ ,  
53  
54 moderate social disadvantage: 36 %  $\pm 4.36$ , high social  
55  
56 disadvantage: 45%  $\pm 7.76$ ,  $p<0.001$ )  
57  
58  
59  
60

1  
2  
3  
4  
5 Chiu et al.<sup>3</sup> reported that gender modified the association  
6 between ethnicity and psychosocial stress. In their study, 24.8%  
7 percent of Asian women reported experiencing stress “extremely”  
8 or “quite a bit” on most days, compared with only 20.8% of  
9 European women. However, there were no significant differences  
10 in the prevalence of self-reported stress between SA and WC men,  
11 with both reporting experiencing stress approximately 22% of the  
12 time. There was also evidence of an effect of time in Canada on  
13 this relationship, in women only; long-term Canadian residents  
14 were less likely to report psychosocial stress compared to recent  
15 immigrants (24.2 vs. 18.0,  $p=0.04$ ).  
16  
17  
18  
19  
20  
21  
22  
23  
24  
25  
26  
27

### 28 Food Intake

29  
30  
31 We identified four studies which analyzed the diet of SA and WC.  
32 Using estimates derived from a validated culture-specific food-  
33 frequency questionnaire (FFQ) in SHARE(44), adult Canadian SA  
34 consumed more fibre ( $21\pm 6$  vs.  $17\pm 5$  g/d;  $p<0.01$ ) and carbohydrates  
35 ( $290\pm 32$  vs.  $269\pm 38$  g,  $p<0.01$ ) and slightly less total fat  
36 ( $59\pm 11.14$  vs.  $62\pm 13$  g/d,  $p<0.01$ ) and protein ( $70\pm 10$  vs.  $78\pm 14$   
37 g/d;  $p<0.01$ ) relative to WC. Similar differences were also  
38 observed in M-CHAT(45) whereas as percentage of total energy  
39 intake, SA consumed more carbohydrates ( $55.5\pm 8.7$  vs.  $47\pm 8.8$  %,  $p<0.001$ ),  
40 less protein ( $16.3\pm 3.7$  vs.  $17.3\pm 4.2$ %,  $p<0.001$ ) and  
41 total fat ( $27.6\pm 7.8$  vs.  $33.7\pm 7.9$ %,  $p<0.001$ ) when compared to WC.  
42  
43  
44  
45  
46  
47  
48  
49  
50  
51  
52  
53

54  
55 Other aspects of diet also differed between SA and WC. In two  
56 studies, SA were more likely to consume adequate amounts of  
57  
58  
59  
60

1  
2  
3 fruits and vegetables (3 or more times a day) compared to WC (1  
4 77-90% vs. 65-82%)(4,16), although SA were more likely to  
5 frequently consume "junk food" (higher scores on a validated FFQ)  
6 (23% of SA vs. 16% of WC)(16). Moreover, Chiu et al.(4) noted  
7 diet quality, as measured by consumption of fruits and  
8 vegetables, was reported to worsen over time among SA. After 15  
9 years of living in Canada, this difference between SA and WC had  
10 dissipated, and was no longer significant, with ~20% consuming  
11 inadequate servings of fruits and vegetables (less than 3 times a  
12 day).

### 23 24 Physical Activity

25  
26  
27  
28 We identified five studies that assessed physical inactivity in  
29 SA and WC. In SHARE(46), SA had lower mean score on the  
30 physical activity index (physical exertion score estimated from  
31 reported type of occupation, time spent playing sports and type  
32 of leisure activities, where a higher score represents increased  
33 physical activity) than WC (7.5 ±1.7 vs. 8.3±1.6, p<0.01). For  
34 the participants in SHARE, Mente et al.(34) noted that SA spent  
35 fewer hours/wk on physical activity relative to WC (7.3±0.1 vs.  
36 8.1±0.1, p<0.001). In Mol-SHARE, SA scored lower on a physical  
37 activity scale (0=low, 1=moderate, 2= high) than WC (Men: 1.5±0.1  
38 vs. 1.9±0.1, women: 1.3 ±0.1 vs. 1.4±0.10). In M-CHAT(24), SA  
39 were physically active for almost 3 hours less per week than WC  
40 (Median mins/week: 166, IQR: 71,294 vs. 321, IQR: 148,151). In a  
41 study by Chiu et al.(4), SA were more likely to be physically  
42  
43  
44  
45  
46  
47  
48  
49  
50  
51  
52  
53  
54  
55  
56  
57  
58  
59  
60

1  
2  
3 inactive ( $\cdot$  15 minutes/day of leisure time physical activity)  
4  
5 than WC (72.8% vs. 62.7%).  
6  
7

8  
9  
10 In an effort to determine the reasons for this lack of physical  
11 activity, Khan, 2010(47), examined the scores on the perceived  
12 environments related to physical activity questionnaires, where  
13 higher scores indicate a more positive physical activity  
14 environment. In this study, SA reported lower availability of  
15 home environment (Mean score:  $2.25 \pm 2.04$  vs.  $3.20 \pm 2.50$ ;  $p < 0.001$ )  
16 and lower convenience of physical activity facilities (Mean  
17 score:  $3.94 \pm 4.39$  vs.  $5.88 \pm 4.87$ ,  $p < 0.001$ ) when compared to WC<sup>25</sup>. In  
18 another study by Booth et al.(48), a greater number of recent  
19 immigrants (most often SA) resided in Greater Toronto Area  
20 neighbourhoods with low walkability as compared to long-term  
21 immigrants (20% vs. 18.3%). An interaction between low  
22 walkability and socioeconomic status (SES) was observed, putting  
23 low income recent immigrants in low walkability areas at  
24 threefold higher risk for diabetes (16.2 per 1,000) compared to  
25 those living in high-income, high walkability areas (5.1 per  
26 1,000).  
27  
28  
29  
30  
31  
32  
33  
34  
35  
36  
37  
38  
39  
40  
41  
42  
43  
44  
45

#### 46 Diagnosis, management and outcomes

##### 47 *Access to testing*

48  
49  
50 We identified four studies that examined symptom presentations  
51 and access to diagnostic tests in SA and WC. In a 2002 chart  
52 review study by Gupta et al.(8) of AMI patients in the Greater  
53  
54  
55  
56  
57  
58  
59  
60

1  
2  
3 Toronto Area, the median time from symptom onset to presentation  
4 to the hospital was longer for SA than WC (3.92 v. 3.08 hrs, p  
5 =0.04). Both groups received angiography (17% vs. 16.3%, p=0.8)  
6 at comparable rates, and the frequency of in-hospital major  
7 complications, median length of hospital days (six days for both)  
8 and frequency of procedures in hospital was similar. In a  
9 database review by King 2009(7), SA patients admitted with acute  
10 MI in Calgary health region (Alberta) were less likely to present  
11 with a classic symptom profile (midsternal pain and/or midsternal  
12 pressure with/without throat/ neck pain with/without shoulder  
13 pain with/without arm pain) as compared to WC (79% vs. 93% ,  
14 p=0.016). In those patients who reported distinct time of onset  
15 of symptoms, a greater proportion of SA delayed presenting to the  
16 ER for more than 12 hours (47% vs. 27%). In this study, SA with  
17 acute MI in Calgary hospitals were also less likely to undergo  
18 cardiac catheterization/angiography in less than 3 hours from  
19 time of arrival to the Emergency Department as compared to WC  
20 (21% vs. 47%; p<0.01).  
21  
22  
23  
24  
25  
26  
27  
28  
29  
30  
31  
32  
33  
34  
35  
36  
37  
38  
39  
40  
41

42 Khan 2010(6), in their retrospective cohort study of SA from  
43 British Columbia (BC) and Calgary Health Region (Alberta), noted  
44 that SA patients with acute MI were more likely to undergo  
45 cardiac catheterization at 30 d (OR:1.32, 95% CI:1.16-1.52,  
46 p<0.01) and at 1 yr (OR:1.44, 95% CI: 1.25-1.65), p<0.01) than  
47 WC. In an age-restricted retrospective chart review of incident  
48 acute MI cases by Albarak, 2012 (28)(n=3057; ages 20-55 yrs),  
49 overall, 44.1% SA in Alberta and BC underwent angiography as  
50  
51  
52  
53  
54  
55  
56  
57  
58  
59  
60

1  
2  
3 compared to 42.7% WC patients. Furthermore there were no  
4  
5 significant differences in utilization of cardiac catheterization  
6  
7 in 24hrs following acute MI between SA and WC patients. However,  
8  
9 in this study covering years 1995-2002, SA patients were more  
10  
11 likely to undergo cardiac catheterization within 1 year of acute  
12  
13 MI (ST-elevation and non-ST-elevation MI) compared with WC  
14  
15 patients (88.8% vs 77.3%,  $p < 0.01$ ).  
16  
17  
18  
19

#### 20 Outcomes post- MI: Mortality rates and Recurrent AMI

21  
22  
23 We identified six studies that compared short- and long-term  
24  
25 mortality rates in SA and WC patients with MI.  
26  
27  
28  
29

##### 30 *Short-term mortality*

31  
32  
33 In Gupta 2002(8), risk-adjusted in hospital mortality rate in  
34  
35 the Greater Toronto Area was similar for both groups (9.1% vs.  
36  
37 7.7%,  $p=0.20$ ). In a chart review, Raghavan, 2008(25) noted that  
38  
39 SA with acute coronary syndrome (ACS) in Montreal, Quebec had  
40  
41 higher in hospital all-cause mortality (5% vs. 2%) when compared  
42  
43 to non-South Asians. In a chart review in Toronto, Brister  
44  
45 2007(49) reported that as compared to WC, SA had increased in  
46  
47 hospital operative mortality (2.5% vs. 1.1%,  $p=0.02$ ) after  
48  
49 admission for MI. South Asian ethnicity was also associated with  
50  
51 higher post-CABG mortality (OR: 3.1, 95% CI: 1.4, 6.8) when  
52  
53 compared to WC. However, Khan, 2010(6) reported lower 30-day  
54  
55 mortality in SA acute MI patients (OR: 0.88, 95% CI: 0.75,1.03,  
56  
57  
58  
59  
60



1  
2  
3 p=0.10) among SA in BC and Alberta. In a retrospective chart  
4 review of 7135 patients with AMI by Albarak, 2012(28), adjusted  
5 hazard ratios for short term mortality were not significantly  
6 different between SA and WC (HR: 0.90; 95% CI: 0.38 to 2.10) in  
7 BC and Alberta.  
8  
9  
10  
11  
12

### 13 *Long-term mortality*

14  
15  
16  
17  
18  
19

20 Raghavan 2008(25) reported that 1-year mortality was  
21 substantially higher in SA patients (6.1% vs. 1.5%) after MI in  
22 Montreal, Quebec. However, Quan 2010(27) showed that SA patients  
23 in BC and Alberta had better survival compared to other Canadians  
24 (aHR:0.76, 95% CI 0.61 to 0.95) in a follow-up of 10.5 years.  
25 Khan 2010(6) also noted that long-term mortality was lower in SA  
26 in BC and Alberta (HR:0.65, 95% CI: 0.57,0.72, p<0.001).  
27 Furthermore, Albarak, 2012(28) reported that 3.5 yr long-term  
28 mortality (HR: 0.81, 95% CI: 0.53,1.26) was not significantly  
29 different between SA and WC patients with acute MI in BC and  
30 Alberta.  
31  
32  
33  
34  
35  
36  
37  
38  
39  
40  
41  
42  
43

44 Two studies described the frequency of recurrent AMI in patients  
45 with MI. In a retrospective cohort study by Khan, 2010(6)  
46 conducted in BC and Alberta, adjusted HR for survivors of MI only  
47 were non-significant among the two groups (aHR:1.07, 95% CI:  
48 0.95-1.2, p=0.20). In Albarak 2012, 27.1 % of SA in B.C. and  
49 Alberta had recurrent AMI as compared to 24.4% of WC patients  
50 (HR: 1.07, 95% CI:0.89,1.29) and 2.9% had congestive heart  
51  
52  
53  
54  
55  
56  
57  
58  
59  
60

1  
2  
3 failure (CHF) vs. 2.7% of WC (HR: 0.90, 95% CI:0. 51,1.59).

4  
5 Although in a subgroup analysis of patients with diabetes, SA  
6  
7 were significantly more likely to develop a recurrent AMI than WC  
8  
9 (aHR: 1.48, 95% CI: 1.04, 2.11) over an 8-year follow-up period.  
10  
11

12  
13 One study reported the health status after MI in SA and WC  
14  
15 patients. In a database review by Bainey 2011(38), SA in Alberta  
16  
17 were more likely to report poor health status, as measured by  
18  
19 Seattle Angina Questionnaire (SAQ), at 1 year after angiography.  
20  
21 SAQ is a self-reported measure of health status where lower  
22  
23 scores indicate poor health. The mean scores for angina frequency  
24  
25 (86±23 vs. 88±20, p<0.001), treatment satisfaction (86±19 vs.  
26  
27 89±16, p<0.001) and quality of life (QOL) (71±24 vs. 76±21,  
28  
29 p<0.001) were significantly lower in SA. There were no  
30  
31 significant differences in angina stability (77±28 vs. 77±27,  
32  
33 p=0.627) and exertional capacity (75±23 vs. 80±23, p=0.11).  
34  
35

36  
37 *Revascularization procedures: Coronary artery bypass grafting*  
38  
39 *(CABG) and Percutaneous coronary intervention (PCI)*  
40  
41

42 In a retrospective chart review, Gupta 2002 reported that SA in  
43  
44 the Greater Toronto Area were equally likely to undergo PCI (2.9  
45  
46 vs. 3.4, p=0.60) and CABG (4.2% vs. 2.2 %, p= 0.06). Similarly,  
47  
48 in a chart review, Singh, 2005 reported that the  
49  
50 revascularization procedure rates were comparable in SA and WC in  
51  
52 the GTA (1% vs. 1 %). However, in the case control study by  
53  
54 Raghavan 2008(25) (n=130), SA in Montreal were less likely to  
55  
56 have PCI, (26% versus 34%) and more likely to undergo CABG (32%  
57  
58  
59  
60

1  
2  
3 versus 18%). This trend persisted at 1-year time point (PCI: 48%  
4  
5 versus 62%, CABG: 35% versus 22%).  
6  
7

8  
9  
10 In a retrospective study by Quan 2010(27), SA with coronary  
11 artery disease (CAD) in BC and Alberta were less likely to  
12 undergo PCI (aOR: 0.86, 95% CI 0.79 to 0.93) within six months  
13 after coronary angiography when compared to WC. This was  
14 consistent after 10.5 years of follow-up after coronary  
15 angiography (aHR 0.95, 95% CI 0.90 to 1.00). However, the  
16 frequency of CABG was similar (aOR: 0.95 (95%CI: 0.87-1.04) in  
17 both groups. In a chart review study in BC and Alberta, Khan,  
18 2010 noted that PCI [aOR: 1.06 (95% CI: 0.9, 1.24] or CABG  
19 frequency [aOR: 1.04 (95% CI: 0.82,1.32)] were not significantly  
20 different at 1 month after AMI. This trend was true for 1 year  
21 after AMI as well [PCI aOR: 1.06 (95% CI: 0.90,1.24 ; CABG aOR:  
22 1.09 (95% CI: 0.90,1.33)].  
23  
24  
25  
26  
27  
28  
29  
30  
31  
32  
33  
34  
35

36  
37 Overall, SA appear to delay presentation to hospital, but once in  
38 hospital they appear to have a similar access to diagnostic  
39 procedure and interventions (PCI, CABG) compared to WC, however  
40 there is some practice and outcome variation between provinces.  
41 The outcomes after hospitalization for ACS suggest that SA may  
42 have higher short-term (< 1 yr) recurrent event rates including  
43 re-hospitalization, and recurrent angina. However short and long-  
44 term mortality post MI appears to be similar among SA and WC.  
45  
46  
47  
48  
49  
50  
51  
52

53  
54  
55 Cardiac Rehabilitation (CR)  
56  
57  
58  
59  
60

1  
2  
3 We identified only one study that compared participation rates in  
4  
5 CR programs between Canadian SA and WC patients. In a hospital  
6  
7 cardiac rehabilitation record review by Banerjee, 2007(23), SA  
8  
9 were less likely to complete the program than WC (43.3% vs. 50.8  
10  
11 %, p=0.04). However, at the end of 6-month program, from those  
12  
13 who completed the program, SA were more likely to achieve target  
14  
15 heart rate (41.8% vs. 54.7%, p=0.02) and achieved greater change  
16  
17 in maximum metabolic equivalents during the exercise tolerance  
18  
19 test (1.35±1.8 vs. 0.93±1.35, p=0.07). One qualitative study  
20  
21 showed that South Asians respond differently to referral type for  
22  
23 CR and may be more responsive to liaison referral, where the  
24  
25 referral is facilitated through a discussion with a health care  
26  
27 professional, as opposed to automatic referral via a computerized  
28  
29 system(50).  
30  
31

### 32 Discussion:

33  
34  
35  
36 In this review, we have assessed the CVD burden, risk factor  
37  
38 profile, receipt of diagnostic and interventions and outcomes  
39  
40 after ACS, and referral and outcomes after cardiac rehabilitation  
41  
42 among South Asians in Canada.  
43  
44

45 *CVD Burden:* Our review of the literature shows that SA living in  
46  
47 Canada have a higher prevalence and incidence of CVD as compared  
48  
49 to WC. Moreover, a study of the Canadian National mortality  
50  
51 database indicated that between 1979 and 1993 Canadian SA have  
52  
53 significantly higher mortality rates from CHD than WC(12).  
54  
55 However, some inter study variation in these results exists which  
56  
57 we attribute to differences in the classification of ethnicity  
58  
59  
60

1  
2  
3 (i.e. self report vs. direct assessment vs. surname  
4 classification) and classification of outcomes (self report vs.  
5 health administrative data). This variation emphasizes the need  
6 to develop a standardized surveillance system of non-communicable  
7 diseases (i.e. CVD, cancer, lung diseases) by ethnic group in  
8 Canada(51,52). Such a system will more efficiently shape health  
9 services policies and programs targeted toward particularly high-  
10 risk ethnic groups.  
11  
12  
13  
14  
15  
16  
17  
18  
19

20  
21  
22 *CV Risk Factors:* Collectively our synthesized evidence shows that  
23 compared to WC, SA living in Canada are more likely to have an  
24 increased prevalence of hypertension, type 2 diabetes,  
25 dysglycemia, insulin resistance, higher percent body fat,  
26 increased visceral adiposity, lower HDL-C levels, elevated apo-  
27 B/apoA1 ratio, lower physical activity and higher carbohydrate  
28 intake, all of which play an important role in the etiology of  
29 CVD in SA. On the positive side, SA in Canada are less like to  
30 smoke cigarettes compared to WC. The sparse available data does  
31 not support differences in TC or LDL between SA and WC Canadians.  
32  
33  
34  
35  
36  
37  
38  
39  
40  
41  
42

43 The studies to date suggest that, even at conventionally "normal"  
44 BMI ranges, Canadian SA, both male and females, have higher body  
45 fat %, increased visceral abdominal fat and greater insulin  
46 resistance(30,53) compared with WC. These findings are consistent  
47 with previous studies in the U.K(54) and the U.S.A.(55,56) of  
48 immigrant South Asian populations(30,53). The reasons for South  
49 Asians' predisposition to this cardio-metabolic risk profile are  
50  
51  
52  
53  
54  
55  
56  
57  
58  
59  
60

1  
2  
3 still not well characterized, and it may be a complex biological  
4 interaction between genetic predisposition and environmental  
5 factors exists. A comparative study showed that a greater  
6 proportion of babies in South India are born with central fat and  
7 increased cord blood insulin as compared to WC babies born in the  
8 U.K(57). This suggests that insulin resistance develops in South  
9 Asians in early infancy and carries an increased risk of diabetes  
10 and CVD in adulthood(58). Studies of Canadian SA adolescents  
11 noted that despite lower BMI, WC and weights, SA adolescents had  
12 substantially higher levels of TG and significantly lower levels  
13 of TC, indicating that the adverse SA risk factor profile  
14 develops in early ages(59). A study currently underway in Canada,  
15 START(60) (South Asian Birth Cohort), which aims to enroll 1000  
16 SA babies born in Southern Ontario, will provide more insight  
17 into the developmental origins of CVD risk factors among SA  
18 infants in Canada.  
19  
20  
21  
22  
23  
24  
25  
26  
27  
28  
29  
30  
31  
32  
33  
34  
35  
36

37 *Diagnostic and Therapeutic of CVD:* Access to health care  
38 including diagnostic cardiac tests and interventions appear to be  
39 similar among SA and WC, although this is contextually dependent.  
40 For example, studies in Alberta and BC show SA are less likely to  
41 undergo angiography in less than three hours(7) after AMI but  
42 more likely to undergo angiography/cardiac catheterization at 30  
43 day and 1 year after AMI(6). Whereas, a study in the Greater  
44 Toronto Area(8) showed that SA and WC were equally likely to  
45 undergo angiography. We did not find any notable differences in  
46 short or long-term mortality after MI, however more data are  
47  
48  
49  
50  
51  
52  
53  
54  
55  
56  
57  
58  
59  
60

1  
2  
3 required to understand the short-term clinical patterns after MI  
4 among SA in Canada, as again this appears to be contextually  
5 dependent and may reflect variations in health systems.  
6  
7 Furthermore, studies in the U.K(61-63) have shown conflicting  
8 results where some studies show higher post-operative mortality  
9 while others show similar mortality rates between the two groups.  
10  
11  
12  
13  
14  
15  
16  
17

18 *Cardiac Rehabilitation:* Some data(64) in the UK suggest that SA  
19 are less adherent to rehabilitation programs than their WC  
20 counterparts. Studies in Canada suggest that the lack of  
21 knowledge of severity and risks of cardiovascular diseases(65,66)  
22 in SA population may make them less likely to continue CR. Grewal  
23 et al.(67) noted that SA in Canada may perceive illness  
24 differently than other ethnic groups, considering it as fate  
25 which may result in poor prognosis and recovery. Other issues  
26 could include language barriers(68), lack of social support and  
27 stress associated with migration.  
28  
29  
30  
31  
32  
33  
34  
35  
36  
37  
38

39 *Future Studies:* Future research is required to understand the  
40 early origin and childhood risk factors prevalence among SA youth  
41 in Canada, to devise suitable screening and management strategies  
42 for SA youth in order to prevent early onset CHD.  
43  
44  
45  
46  
47

48 *Strengths and Limitations:* In this review we statistically pooled  
49 the largest studies of CVD risk in Canadian South Asians, and  
50 where heterogeneity existed examined the causes. Most of our  
51 findings are consistent with literature in the U.K(61-63) and the  
52 U.S.A(54). However, this review is not without limitations.  
53  
54  
55  
56  
57  
58  
59  
60

1  
2  
3 Analysis of existing literature was difficult due to limited  
4 amount of studies in Canadian South Asians, diversity of study  
5 designs and sampling schema, and lack of standardized measures  
6 for race/ethnicity. Some studies measured ethnicity using self-  
7 report while others used an algorithm taking into account  
8 surnames and birthplace.  
9

10  
11  
12  
13  
14  
15  
16 As with any systematic review of observational studies, we found  
17 much heterogeneity for most outcomes as the dataset encompassed a  
18 wide range of accrual years and various study types. The values  
19 for the  $I^2$  statistic were frequently in the 75-90 % range,  
20 signifying considerable unexplained heterogeneity. We explored  
21 the causes of heterogeneity by conducting sensitivity analyses  
22 using high quality studies and subgroup analysis of study types  
23 and sampling mechanism. However, despite this high level of  
24 heterogeneity, we believe that some important consistencies were  
25 demonstrated—first, in the majority of individual studies, the  
26 point estimates were consistent with higher insulin, TG, HDL-C  
27 and TC: HDL-C in SA than in WC. Second, when we stratified our  
28 analyses by sampling mechanism, the unexplained heterogeneity in  
29 adiposity was reduced to almost 0%. Residual differences may be  
30 attributable to lack of standardized definitions of ethnicity and  
31 varying study designs.  
32  
33  
34  
35  
36  
37  
38  
39  
40  
41  
42  
43  
44  
45  
46  
47  
48

49  
50 Conclusion: Given the increased prevalence and mortality  
51 associated with CVD among SA living in Canada, intervention  
52 strategies to reduce risk factors and CVD in this group, and  
53  
54  
55  
56  
57  
58  
59  
60



1  
2  
3 research to understand the early life determinants of CV risk  
4  
5 factors in this high risk population are needed.  
6  
7

8 ACKNOWLEDGEMENTS: We thank Arnav Agarwal and Sonia Ruparell for  
9  
10 their assistance with extracting data for some of the articles.  
11  
12 We also thank Dr. Katherine Cianflone and Dr. Aman Nijjar for  
13  
14 sharing their data and additional information about the studies  
15  
16 with us. Dr. Sonia Anand holds the Michael DeGroote Heart and  
17  
18 Stroke Chair in Population Health, a Canada Research Chair in  
19  
20 Ethnicity and Cardiovascular Disease and the Eli Lilly May Cohen  
21  
22 Chair in Womens Health. Dr. Scott Lear holds the Pfizer/Heart and  
23  
24 Stroke Foundation Chair in Cardiovascular Prevention Research at  
25  
26 St. Paul's Hospital.  
27  
28  
29  
30  
31  
32  
33  
34  
35  
36  
37  
38  
39  
40  
41  
42  
43  
44  
45  
46  
47  
48  
49  
50  
51  
52  
53  
54  
55  
56  
57  
58  
59  
60

## References

1. Statistic Canada. The South Asian Community in Canada: Highlights. 2007 [cited 2012 Nov 9]. Available from: <http://www.statcan.gc.ca/pub/89-621-x/2007006/4123223-eng.htm>
2. Anand SS, Yusuf S, Vuksan V, Devanesen S, Teo KK, Montague P a, et al. Differences in risk factors, atherosclerosis and cardiovascular disease between ethnic groups in Canada: the study of health assessment and risk in ethnic groups (SHARE). *Indian heart journal*. 2000;52(7 Suppl):S35-43.
3. Chiu M, Austin PC, Manuel DG, Tu J V. Comparison of cardiovascular risk profiles among ethnic groups using population health surveys between 1996 and 2007. *CMAJ*. 2010 May 18;182(8):E301-10.
4. Chiu M, Austin PC, Manuel DG, Tu J V. Cardiovascular risk factor profiles of recent immigrants vs long-term residents of Ontario: a multi-ethnic study. *Can J Cardiol*. 2012;28(1):20-6.
5. Vuksan V, Rogovik A, Jenkins A. Cardiovascular risk factors, diet and lifestyle among European, South Asian and Chinese adolescents in Canada. *Paediatric Child Health*. 2012 [;17(1):1-6.
6. Khan N, Grubisic M, Hemmelgarn B, Humphries K, King KM, Quan H. Outcomes after acute myocardial infarction in South

- 1  
2  
3 Asian, Chinese, and white patients. *Circulation*. 2010 Oct  
4  
5 19;122(16):1570-7.  
6  
7  
8  
9 7. King KM, Khan N, Quan H. Ethnic variation in acute  
10 myocardial infarction presentation and access to care. *Am J*  
11 *Cardiol*. 2009 May 15;103(10):1368-73.  
12  
13  
14  
15  
16 8. Gupta M, Doobay A. Risk factors, hospital management and  
17 outcomes after acute myocardial infarction in South Asian  
18 Canadians and matched control subjects. *CMAJ*.  
19  
20 2002;166(6):717-22.  
21  
22  
23  
24  
25 9. Higgins JPT, Deeks JJ (editors). Chapter 7: Selecting  
26 studies and collecting data. In: Higgins JPT, Green S  
27 (editors), *Cochrane Handbook for Systematic Reviews of*  
28 *Interventions* Version 5.1.0 (updated March 2011). The  
29 Cochrane Collaboration, 2011. Available from [www.cochrane-](http://www.cochrane-handbook.org)  
30 [handbook.org](http://www.cochrane-handbook.org).  
31  
32  
33  
34  
35  
36  
37  
38  
39 10. Wells G, Shea B, O'Connell D. et al. The Newcastle-Ottawa  
40 Scale (NOS) for assessing the quality of nonrandomized  
41 studies in meta-analysis. 2000 [cited 2013 Jan 1]. Available  
42 at [http://www.ohri.ca/programs/clinical\\_epidemiology/oxford\\_](http://www.ohri.ca/programs/clinical_epidemiology/oxford_web.ppt)  
43 [web.ppt](http://www.ohri.ca/programs/clinical_epidemiology/oxford_web.ppt).  
44  
45  
46  
47  
48  
49  
50 11. Nijjar A, Wang H. Ethnic and sex differences in the  
51 incidence of hospitalized acute myocardial infarction:  
52 British Columbia, Canada 1995-2002. *BMC Card Dis*.  
53  
54 2010;10(38):1471-2261.  
55  
56  
57  
58  
59  
60

- 1  
2  
3 12. Sheth T, Nair C, Nargundkar M. Cardiovascular and cancer  
4 mortality among Canadians of European, south Asian and  
5 Chinese origin from 1979 to 1993: an analysis of 1.2 million  
6 deaths. *CMAJ*. 1999;161(2):2-8.  
7  
8  
9  
10  
11  
12 13. Smith J, Cianflone K, Al-Amri M, Sniderman A. Body  
13 composition and the apoB/apoA-I ratio in migrant Asian  
14 Indians and white Caucasians in Canada. *Clin Sci*.  
15 2006;111(3):201-7.  
16  
17  
18  
19  
20  
21  
22 14. Lear S, Kohli S, Bondy GP, Tchernof A, Sniderman AD. Ethnic  
23 variation in fat and lean body mass and the association with  
24 insulin resistance. *J Clin Endocrinol Metab*. 2009 Dec  
25 ;94(12):4696-702.  
26  
27  
28  
29  
30  
31  
32 15. Lear S, Toma M, Birmingham CL, Frohlich JJ. Modification of  
33 the relationship between simple anthropometric indices and  
34 risk factors by ethnic background. *Metabolism*. 2003  
35 Oct;52(10):1295-301.  
36  
37  
38  
39  
40  
41 16. Loughlin J, Maximova K. Lifestyle risk factors for chronic  
42 disease across family origin among adults in multiethnic,  
43 low-income, urban neighborhoods. *Ethn Dis*. 2007;17:657-63.  
44  
45  
46  
47  
48 17. Anand SS, Tarnopolsky M, Rashid S, Schulze KM, Desai D,  
49 Mente A, et al. Adipocyte hypertrophy, fatty liver and  
50 metabolic risk factors in South Asians: the Molecular Study  
51 of Health and Risk in Ethnic Groups (mol-SHARE). *PloS one*.  
52 2011 Jan;6(7):e22112.  
53  
54  
55  
56  
57  
58  
59  
60

- 1  
2  
3  
4  
5  
6  
7  
8  
9  
10  
11  
12  
13  
14  
15  
16  
17  
18  
19  
20  
21  
22  
23  
24  
25  
26  
27  
28  
29  
30  
31  
32  
33  
34  
35  
36  
37  
38  
39  
40  
41  
42  
43  
44  
45  
46  
47  
48  
49  
50  
51  
52  
53  
54  
55  
56  
57  
58  
59  
60
18. Razak F, Anand S, Vuksan V, Davis B, Jacobs R, Teo KK, et al. Ethnic differences in the relationships between obesity and glucose-metabolic abnormalities: a cross-sectional population-based study. *Int J Obes*. 2005 Jun;29(6):656-67.
  19. Smith J, Al-Amri M. Leptin and adiponectin in relation to body fat percentage, waist to hip ratio and the apoB/apoA1 ratio in Asian Indian and Caucasian men and women. *Nutr Metab*. 2006;3(18):1-8.
  20. Lear S, Chockalingam A, Kohli S, Richardson CG, Humphries KH. Elevation in Cardiovascular Disease Risk in South Asians Is Mediated by Differences in Visceral Adipose Tissue. *Obesity (Silver Spring)*. 2012 Jun;20(6):1293-300.
  21. Anand S, Yusuf S. Risk factors for cardiovascular disease in Canadians of South Asian and European origin: a pilot study of the Study of Heart Assessment and Risk in Ethnic Groups (SHARE). *Clin invest med*. 1997;20(4):204-10.
  22. Smith J, Al-Amri M, Sniderman A, Cianflone K. Visfatin concentration in Asian Indians is correlated with high density lipoprotein cholesterol and apolipoprotein A1. *Clin Endocrinol (Oxf)*. 2006;65:667-72.
  23. Banerjee AT, Gupta M, Singh N. Patient characteristics, compliance, and exercise outcomes of South Asians enrolled

- 1  
2  
3 in cardiac rehabilitation. *J Cardiopulm Rehabil Prev.*  
4  
5 2007;27(4):212-8.  
6  
7  
8  
9 24. Lear S, Humphries KH, Kohli S, Chockalingam A, Frohlich JJ,  
10 Birmingham CL. Visceral adipose tissue accumulation differs  
11 according to ethnic background: results of the Multicultural  
12 Community Health Assessment Trial (M-CHAT). *Am J Clin Nutr.*  
13 2007;86(2):353-9.  
14  
15  
16  
17  
18  
19  
20 25. Raghavan R, Rahme E, Nedjar H, Huynh T. Long-term prognosis  
21 of south Asians following acute coronary syndromes. *Can J*  
22 *Cardiol.* 2008;24(7):585-7.  
23  
24  
25  
26  
27 26. Liu R, So L, Mohan S, Khan N, King K, Quan H. Cardiovascular  
28 risk factors in ethnic populations within Canada: results  
29 from national cross-sectional surveys. *Open Med.*  
30 2010;4(3):e143-e153.  
31  
32  
33  
34  
35  
36  
37 27. Quan H, Khan N, Li B, Humphries K. Invasive cardiac  
38 procedure use and mortality among South Asian and Chinese  
39 Canadians with coronary artery disease. *Can J Cardiol.*  
40 2010;26(7):e236-e242.  
41  
42  
43  
44  
45  
46 28. Albarak J, Nijjar APK, Aymong E, Wang H, Quan H, Khan N.  
47 Outcomes in young South Asian Canadians after acute  
48 myocardial infarction. *Can J Cardiol.* 2012;28(2):178-83.  
49  
50  
51  
52  
53 29. Khan N, Wang H, Anand S. Ethnicity and sex affect diabetes  
54 incidence and outcomes. *Diabetes Care.* 2011;34(1):96-101.  
55  
56  
57  
58  
59  
60

- 1  
2  
3 30. Chiu M, Austin PC, Manuel DG, Shah BR, Tu J V. Deriving  
4 ethnic-specific BMI cutoff points for assessing diabetes  
5 risk. *Diabetes care*. 2011;34(8):1741-8.  
6  
7  
8  
9  
10 31. Razak F, Anand SS, Shannon H, Vuksan V, Davis B, Jacobs R,  
11 et al. Defining obesity cut points in a multiethnic  
12 population. *Circulation*. 2007;115(16):2111-8.  
13  
14  
15  
16  
17 32. He M, Li E, Harris S, Huff M. Anthropometric surrogate  
18 cutoffs and metabolic abnormalities among Canadians of East  
19 Asian, South Asian, and European descent. *Can Fam Physician*.  
20 2010;56:e174-182.  
21  
22  
23  
24  
25  
26  
27 33. Lear S, Toma M, Birmingham CL, Frohlich JJ. Modification of  
28 the relationship between simple anthropometric indices and  
29 risk factors by ethnic background. *Metabolism*. 2003  
30 Oct;52(10):1295-301.  
31  
32  
33  
34  
35  
36  
37 34. Mente A, Razak F, Blankenberg S. Ethnic variation in  
38 adiponectin and leptin levels and their association with  
39 adiposity and insulin resistance. *Diabetes Care*.  
40 2010;33(7):1629-34.  
41  
42  
43  
44  
45  
46 35. Gasevic D, Frohlich J, Mancini GBJ, Lear S. The association  
47 between triglyceride to high-density-lipoprotein cholesterol  
48 ratio and insulin resistance in a multiethnic primary  
49 prevention cohort. *Metabolism*. 2012 Apr;61(4):583-9.  
50  
51  
52  
53  
54  
55  
56  
57  
58  
59  
60

- 1  
2  
3 36. Kaul P, McAlister F, Ezekowitz J, Grover VK, Quan H. Ethnic  
4 differences in 1-year mortality among patients hospitalised  
5 with heart failure. *Heart*. 2011;97(13):1048-53.  
6  
7  
8  
9  
10 37. Lear S, Humphries KH, Kohli S, Frohlich JJ, Birmingham CL,  
11 Mancini GBJ. Visceral adipose tissue, a potential risk  
12 factor for carotid atherosclerosis: results of the  
13 Multicultural Community Health Assessment Trial (M-CHAT).  
14 *Stroke*. 2007 Sep;38(9):2422-9.  
15  
16  
17  
18  
19  
20  
21 38. Bainey KR, Norris CM, Gupta M, Southern D, Galbraith D,  
22 Knudtson ML, et al. Altered health status and quality of  
23 life in South Asians with coronary artery disease. *Am Heart*  
24 *J*. 2011 Sep;162(3):501-6.  
25  
26  
27  
28  
29  
30  
31 39. Prasad G, Vangala S. South Asian ethnicity as a risk factor  
32 for major adverse cardiovascular events after renal  
33 transplantation. *Clin J Am Soc Nephrol*. 2011;6:204-11.  
34  
35  
36  
37  
38  
39 40. Anand SS, Yi Q, Gerstein H, Lonn E, Jacobs R, Vuksan V, et  
40 al. Relationship of metabolic syndrome and fibrinolytic  
41 dysfunction to cardiovascular disease. *Circulation*. 2003 Jul  
42 29;108(4):420-5.  
43  
44  
45  
46  
47  
48 41. Anand SS, Razak F, Yi Q, Davis B, Jacobs R, Vuksan V, et al.  
49 C-reactive protein as a screening test for cardiovascular  
50 risk in a multiethnic population. *Arterioscl Thromb Vas*.  
51 2004 Aug;24(8):1509-15.  
52  
53  
54  
55  
56  
57  
58  
59  
60



- 1  
2  
3 42. Lear S, Humphries KH, Kohli S, Birmingham CL. The use of BMI  
4 and waist circumference as surrogates of body fat differs by  
5 ethnicity. *Obesity (Silver Spring)*. 2007;15(11):2817-24.  
6  
7  
8  
9  
10 43. Anand SS, Razak F, Davis a D, Jacobs R, Vuksan V, Teo K, et  
11 al. Social disadvantage and cardiovascular disease:  
12 development of an index and analysis of age, sex, and  
13 ethnicity effects. *Int J Epidemiol*. 2006 Oct;35(5):1239-45.  
14  
15  
16  
17  
18  
19  
20 44. Merchant A, Anand S. Protein intake is inversely associated  
21 with abdominal obesity in a multi-ethnic population. *J Nutr*.  
22 2005;135(5):1196-201.  
23  
24  
25  
26  
27 45. Kohli S, Sniderman AD, Tchernof A, Lear S a. Ethnic-specific  
28 differences in abdominal subcutaneous adipose tissue  
29 compartments. *Obesity (Silver Spring)*. 2010 Nov;18(11):2177-  
30 83.  
31  
32  
33  
34  
35  
36  
37 46. Merchant AT, Anand SS, Kelemen LE, Vuksan V, Jacobs R, Davis  
38 B, et al. Carbohydrate intake and HDL in a multiethnic  
39 population. *Am J Clin Nutr*. 2007 Jan;85(1):225-30.  
40  
41  
42  
43  
44 47. Khan SN, Grace SL, Oh P, Anand S, Stewart DE, Wu G, et al. A  
45 comparison of physical activity environments between South  
46 Asians and white Caucasians with coronary heart disease.  
47  
48 *Ethn Dis*. 2010 Jan;20(4):390-5.  
49  
50  
51  
52  
53 48. Booth GL, Creatore MI, Moineddin R, Gozdyra P, Weyman JT,  
54 Matheson FI, et al. Unwalkable neighborhoods, poverty, and  
55 the risk of diabetes among recent immigrants to Canada  
56  
57  
58  
59  
60

- 1  
2  
3 compared with long-term residents. Diabetes Care. 2013  
4  
5 Feb;36(2):302-8.  
6  
7
- 8  
9 49. Brister SJ, Hamdulay Z, Verma S, Maganti M, Buchanan MR.  
10 Ethnic diversity: South Asian ethnicity is associated with  
11 increased coronary artery bypass grafting mortality. J  
12 Thorac Cardiovas Surg. 2007 Jan;133(1):150-4.  
13  
14  
15  
16  
17
- 18 50. Grewal K, Leung YW, Safai P, Stewart DE, Anand S, Gupta M,  
19 et al. Access to cardiac rehabilitation among South-Asian  
20 patients by referral method: a qualitative study.  
21 Rehabilitation Nursing. 2010;35(3):106-12.  
22  
23  
24  
25  
26
- 27 51. Heart and Stroke Foundation of Canada. Growing burden of  
28 heart disease and stroke. [Internet]. [cited 2013 Jul 12].  
29 Available from:  
30 [http://www.cvdinfobase.ca/cvdbook/CVD\\_En03.pdf](http://www.cvdinfobase.ca/cvdbook/CVD_En03.pdf)  
31  
32  
33  
34  
35  
36
- 37 52. Canadian Cardiovascular Outcomes Research Team. Improving  
38 Cardiovascular Disease Surveillance in Canada's Ethnic  
39 Minority Groups [Internet]. [cited 2013 Jul 12]. Available  
40 from: <http://www.ccort.ca/CVDandEthnicity.aspx>  
41  
42  
43  
44  
45
- 46 53. Anand SS, Razak F, Vuksan V, Gerstein HC, Malmberg K, Yi Q,  
47 et al. Diagnostic strategies to detect glucose intolerance  
48 in a multiethnic population. Diabetes care. 2003  
49 Feb;26(2):290-6.  
50  
51  
52  
53  
54
- 55 54. Ivey S, Khatta M, Vedanthan R . A Brown Paper: The Health  
56 of South Asians in the United States. [Internet]. [Updated  
57  
58  
59  
60

- 1  
2  
3 September 2002. Cited 2013 Jul 15]. The South Asian Public  
4 Health Association (SAPHA). Available from  
5  
6 [http://www.sapha.org/adminkit/uploads/files/BrownPaper-](http://www.sapha.org/adminkit/uploads/files/BrownPaper-CVD.pdf)  
7  
8 CVD.pdf  
9  
10
- 11  
12  
13 55. Enas EA, Garg A, Davidson MA, Nair VM, Huet BA, Yusuf S.  
14 Coronary heart disease and its risk factors in first-  
15 generation immigrant Asian Indians to the United States of  
16 America. Indian heart journal. 1996 Jan 8;48(4):343-53.  
17  
18  
19  
20  
21  
22 56. Hoyert DL, Kung HC. Asian or Pacific Islander mortality,  
23 selected states, 1992. Monthly vital statistics report. 1997  
24 Aug 14;46(1 Suppl):1-63.  
25  
26  
27  
28  
29  
30 57. Yajnik CS, Lubree HG, Rege SS, Naik SS, Deshpande JA,  
31 Deshpande SS, et al. Adiposity and hyperinsulinemia in  
32 Indians are present at birth. J Clin Endocrinol Metab. 2002  
33 Dec;87(12):5575-80.  
34  
35  
36  
37  
38  
39 58. Mather HM, Keen H. The Southall Diabetes Survey: prevalence  
40 of known diabetes in Asians and Europeans. BMJ(Clinical  
41 research ed.). 1985 Oct 19;291(6502):1081-4.  
42  
43  
44  
45  
46 59. Vuksan V, Peeva V, Rogovik A, Beljan-zdravkovic U. The  
47 metabolic syndrome in healthy , multiethnic adolescents in  
48 Toronto , Ontario•: The use of fasting blood glucose as a  
49 simple indicator. Can J Cardiol. 2010;26(3):128-32.  
50  
51  
52  
53  
54  
55  
56 60. Anand SS, Gupta M, Beyene J, Dunn J, Hynie M, Irvine J, et  
57 al. START Study Protocol Full Study Title•: The South Asian  
58  
59  
60

- 1  
2  
3 biRth cohort. [Internet]. [Updated May 2012, cited 2013 Ju  
4 13]. Available from  
5  
6 [http://southasianbirthcohort.com/cms/Media/file/START\\_protoc  
7 ol\\_version\\_1%201\\_10May2012.pdf](http://southasianbirthcohort.com/cms/Media/file/START_protocol_version_1%201_10May2012.pdf)  
8  
9  
10  
11  
12  
13 61. Hughes LO, Raval U, Raftery EB. First myocardial infarctions  
14 in Asian and white men. *BMJ (Clinical research ed.)*. 1989  
15 May 20;298(6684):1345-50.  
16  
17  
18  
19  
20 62. Mukhtar HT, Littler WA. Survival after acute myocardial  
21 infarction in Asian and white patients in Birmingham. *Brit*  
22 *Heart J*. 1995 Feb;73(2):122-4.  
23  
24  
25  
26  
27 63. Wilkinson P, Sayer J, Laji K, Grundy C, Marchant B, Kopelman  
28 P, et al. Comparison of case fatality in south Asian and  
29 white patients after acute myocardial infarction:  
30 observational study. *BMJ*. 1996 May 25;312(7042):1330-3.  
31  
32  
33  
34  
35  
36  
37 64. Tod M, Wadsworth E, Asif S, Gerrish K. Cardiac  
38 rehabilitation: the needs of South Asian cardiac patients.  
39 *Br J Nurs*.2001;10(16):1028-33.  
40  
41  
42  
43  
44 65. Grunau GL, Ratner P, Hossain S. Ethnic and gender  
45 differences in perceptions of mortality risk in a Canadian  
46 urban centre. *Int J Gen Med*. 2008 Jan;1:41-50.  
47  
48  
49  
50  
51 66. Kayaniyil S, Ardern C, Winstanley J, Parsons C, Brister S,  
52 Stewart DE, et al. Degree and Correlated of Cardiac  
53 knowledge and awareness among Cardiac Inpatients. *Patient*  
54 *Educ Couns*. 2010;75(1):99-107.  
55  
56  
57  
58  
59  
60

- 1  
2  
3 67. Grewal K, Stewart DE, Grace SL. Differences in social  
4 support and illness perceptions among South Asian and  
5 Caucasian patients with coronary artery disease. Heart Lung.  
6 2010;39(3):180-7.  
7  
8  
9  
10  
11  
12 68. Banerjee AT, Grace SL, Thomas SG, Faulkner G. Cultural  
13 factors facilitating cardiac rehabilitation participation  
14 among Canadian South Asians: a qualitative study. Heart  
15 Lung. 2010;39(6):494-503.  
16  
17  
18  
19  
20  
21  
22  
23  
24  
25  
26  
27  
28  
29  
30  
31  
32  
33  
34  
35  
36  
37  
38  
39  
40  
41  
42  
43  
44  
45  
46  
47  
48  
49  
50  
51  
52  
53  
54  
55  
56  
57  
58  
59  
60

Confidential

1  
2  
3 Tables and Figures  
4

5 Table 1. Study characteristics  
6

7 Figure 1. CONSORT diagram of selection of studies  
8

9  
10 Figure 2. Forest plot of comparison: SA vs. WC, outcome: BMI  
11 [kg/m<sup>2</sup>] men  
12

13 Figure 3. Forest plot of comparison: SA vs. WC, outcome: BMI  
14 [kg/m<sup>2</sup>] women  
15

16 Figure 4. Forest plot of comparison: SA vs. WC, outcome: Obesity  
17

18 Figure 5. Forest plot of comparison: SA vs. WC, outcome: WHR men  
19

20 Figure 6. Forest plot of comparison: SA vs. WC, outcome: WHR  
21 women  
22

23  
24 Figure 7. Forest plot of comparison: SA vs. WC, outcome: WC [cm]  
25 men  
26

27 Figure 8. Forest plot of comparison: SA vs. WC, outcome: WC [cm]  
28 women  
29

30 Figure 9. Forest plot of comparison: SA vs. WC, outcome: Body Fat  
31 [%] men  
32

33  
34 Figure 10. Forest plot of comparison: SA vs. WC, outcome: Body  
35 Fat [%] women  
36

37 Figure 11. Forest plot of comparison: SA vs. WC, outcome:  
38 Diabetes  
39

40 Figure 12. Forest plot of comparison: SA vs. WC, outcome: Fasting  
41 Blood Glucose [mmol/L].  
42

43 Figure 13. Forest plot of comparison: SA vs. WC, outcome: Fasting  
44 Insulin [pmol/L].  
45

46 Figure 14. Forest plot of comparison: SA vs. WC, outcome: HOMA-IR  
47

48 Figure 15. Forest plot of comparison: SA vs. WC, outcome: SBP  
49 [mmHg].  
50

51  
52 Figure 16. Forest plot of comparison: SA vs. WC, outcome: DBP  
53 [mmHg].  
54

55  
56 Figure 17. Forest plot of comparison: SA vs. WC, outcome:  
57 Hypertension  
58  
59  
60

1  
2  
3 Figure 18. Forest plot of comparison: SA vs. WC, outcome: Total  
4 Cholesterol [mmol/L].  
5

6 Figure 19. Forest plot of comparison: SA vs. WC, outcome: LDL-C  
7 [mmol/L].  
8

9  
10 Figure 20. Forest plot of comparison: SA vs. WC, outcome: HDL-C  
11 [mmol/L].  
12

13 Figure 21. Forest plot of comparison: SA vs. WC, outcome: TC:  
14 HDL-C [mmol/L].  
15

16 Figure 22. Forest plot of comparison: SA vs. WC, outcome:  
17 Triglycerides [mmol/L].  
18

19 Figure 23. Forest plot of comparison: SA vs. WC, outcome: Smoking  
20  
21

## 22 23 Supplemental Appendix

24 Appendix 1. Search Strategy  
25  
26  
27  
28  
29  
30  
31  
32  
33  
34  
35  
36  
37  
38  
39  
40  
41  
42  
43  
44  
45  
46  
47  
48  
49  
50  
51  
52  
53  
54  
55  
56  
57  
58  
59  
60

1  
2  
3  
4  
5  
6  
7  
8  
9  
10  
11  
12  
13  
14  
15  
16  
17  
18  
19  
20  
21  
22  
23  
24  
25  
26  
27  
28  
29  
30  
31  
32  
33  
34  
35  
36  
37  
38  
39  
40  
41  
42  
43  
44  
45  
46  
47  
48  
49  
50  
51  
52  
53  
54  
55  
56  
57  
58  
59  
60

Confidential



|                                                                                                                                                                                                 | Main Study/<br>Database     | City/<br>Province                          | Study Design              | Study Duration                  | No. of Subjects | % Men/<br>Women | Mean Age                | No. of SA            | % SA | Outcomes Measured | Study Score                                                                                                                |   |
|-------------------------------------------------------------------------------------------------------------------------------------------------------------------------------------------------|-----------------------------|--------------------------------------------|---------------------------|---------------------------------|-----------------|-----------------|-------------------------|----------------------|------|-------------------|----------------------------------------------------------------------------------------------------------------------------|---|
| 1<br>2<br>3<br>4<br>5<br>6<br>7<br>8<br>9<br>10<br>11<br>12<br>13<br>14<br>15<br>16<br>17<br>18<br>19<br>20<br>21<br>22<br>23<br>24<br>25<br>26<br>27<br>28<br>29<br>30<br>31<br>32<br>33<br>34 | <b>Albarak et al., 2012</b> | Hospital Discharge Abstract Database (DAD) | British Columbia          | Retrospective Cohort            | 8 years         | 7135            | SA: 90/10,<br>WC: 82/18 | N/A                  | 487  | 6.8               | Diabetes prevalence, Hypertension prevalence, Thirty-day mortality after AMI, long-term mortality after AMI, Recurrent AMI | 4 |
| 35<br>36<br>37<br>38<br>39<br>40<br>41<br>42<br>43<br>44<br>45<br>46<br>47<br>48<br>49                                                                                                          | <b>Anand et al., 2000</b>   | SHARE                                      | Hamilton Toronto Edmonton | Cross-sectional Random Sampling | N/A             | 985             | SA: 55/45,<br>WC: 48/52 | SA 49.4,<br>WC: 51.2 | 342  | 34.7              | CVD prevalence, Blood pressure, BMI, WHR,                                                                                  | 6 |

1  
2  
3  
4  
5  
6  
7  
8  
9  
10  
11  
12  
13  
14  
15  
16  
17  
18  
19  
20  
21  
22  
23  
24  
25  
26  
27  
28  
29  
30  
31  
32  
33  
34  
35  
36  
37  
38  
39  
40  
41  
42  
43  
44  
45  
46  
47  
48  
49

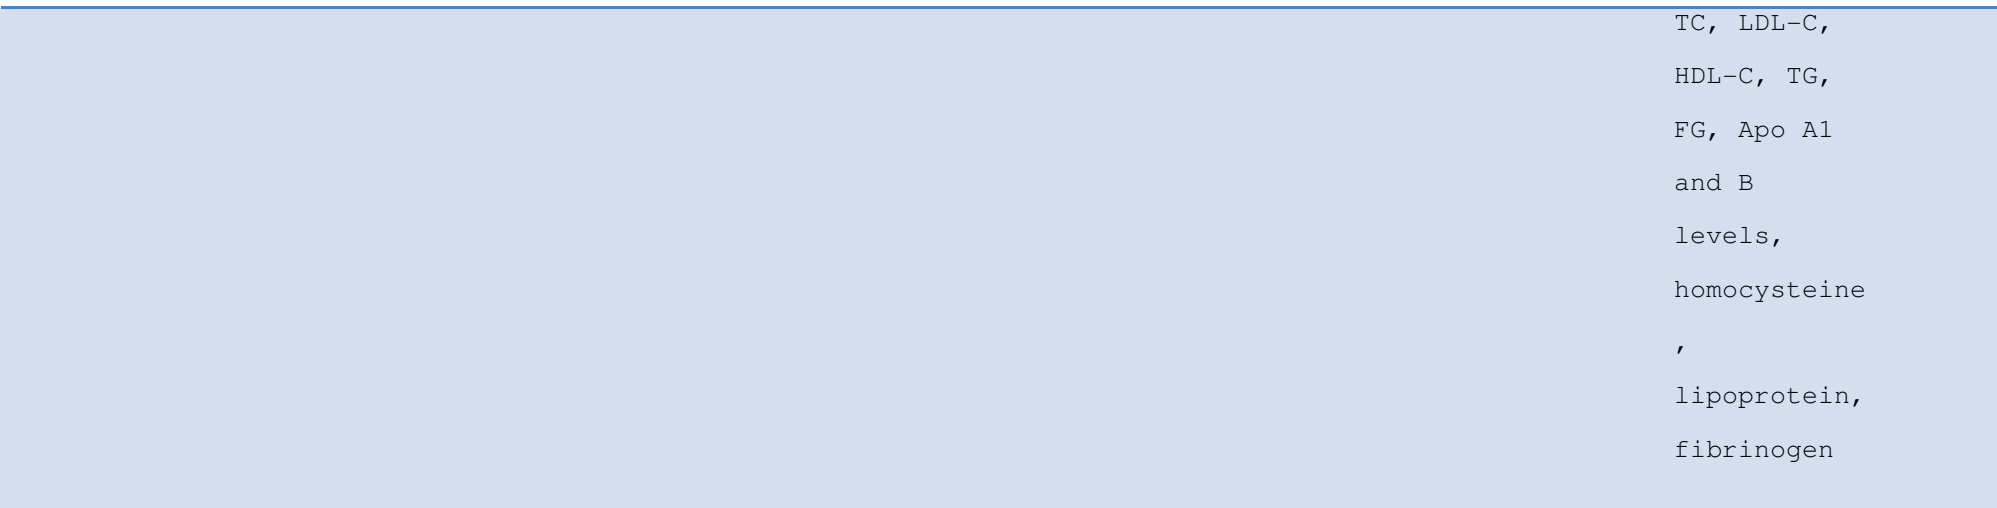

TC, LDL-C,  
HDL-C, TG,  
FG, Apo A1  
and B  
levels,  
homocysteine  
,  
lipoprotein,  
fibrinogen

|                           |       |                                 |                                  |     |     |     |  |  |     |      |                                                     |   |
|---------------------------|-------|---------------------------------|----------------------------------|-----|-----|-----|--|--|-----|------|-----------------------------------------------------|---|
| <b>Anand et al., 2003</b> | SHARE | Hamilton<br>Toronto<br>Edmonton | Cross-sectional<br>Random sample | N/A | 936 | N/A |  |  | 315 | 33.7 | Sensitivity, Specificity of the new diabetes cutoff | 5 |
|---------------------------|-------|---------------------------------|----------------------------------|-----|-----|-----|--|--|-----|------|-----------------------------------------------------|---|

|                           |                    |                                             |                                  |     |      |               |      |  |     |      |                                  |   |
|---------------------------|--------------------|---------------------------------------------|----------------------------------|-----|------|---------------|------|--|-----|------|----------------------------------|---|
| <b>Anand et al., 2003</b> | SHARE/<br>SHARE-AP | Hamilton<br>Toronto<br>Edmonton<br>Oshweken | Cross-sectional<br>Random Sample | N/A | 1276 | 48.9/<br>51.1 | 50.4 |  | 342 | 26.8 | Prevalence of metabolic syndrome | 5 |
|---------------------------|--------------------|---------------------------------------------|----------------------------------|-----|------|---------------|------|--|-----|------|----------------------------------|---|

|                           |                    |                                 |                                  |     |      |               |      |  |     |      |                            |   |
|---------------------------|--------------------|---------------------------------|----------------------------------|-----|------|---------------|------|--|-----|------|----------------------------|---|
| <b>Anand et al., 2004</b> | SHARE/<br>SHARE-AP | Hamilton<br>Toronto<br>Edmonton | Cross-sectional<br>Random sample | N/A | 1250 | 48.9/<br>51.1 | 50.4 |  | 323 | 25.9 | Mean scores for C-reactive | 5 |
|---------------------------|--------------------|---------------------------------|----------------------------------|-----|------|---------------|------|--|-----|------|----------------------------|---|

|                           |                    |                                             |                                       |                               |      |                                       |                             |     |      |                                                                                                                                                                                              |   |
|---------------------------|--------------------|---------------------------------------------|---------------------------------------|-------------------------------|------|---------------------------------------|-----------------------------|-----|------|----------------------------------------------------------------------------------------------------------------------------------------------------------------------------------------------|---|
|                           |                    | Oshweken                                    |                                       |                               |      |                                       |                             |     |      | protein                                                                                                                                                                                      |   |
| <b>Anand et al., 2006</b> | SHARE/<br>SHARE-AP | Toronto<br>Edmonton<br>Hamilton<br>Oshweken | Cross-sectional<br>Random<br>Sampling | N/A                           | 1227 | WC:<br>48.2/<br>51.8,<br>SA:<br>55/45 | WC:<br>51.3,<br>SA:<br>49.4 | 342 | 27.9 | Levels of<br>social<br>disadvantage                                                                                                                                                          | 5 |
| <b>Anand et al., 2011</b> | SHARE              | Hamilton                                    | Cross-sectional<br>Random<br>Sampling | 2005-<br>2009<br>(4<br>years) | 108  | 49/51                                 | 35                          | 56  | 52   | Insulin, HDL<br>cholesterol,<br>adiponectin,<br>adipocyte<br>area, lean<br>muscle mass,<br>liver fat,<br>visceral<br>fat,<br>superficial<br>subcutaneous<br>fat, deep<br>subcutaneous<br>fat | 5 |
| <b>Anand et</b>           | SHARE-             | Hamilton                                    | Cross-                                | N/A                           | 51   | N/A                                   | N/A                         | 31  | 61.8 | IGT, TC:HDL,                                                                                                                                                                                 | 3 |

Confidential

1  
2  
3  
4  
5  
6  
7  
8  
9  
10  
11  
12  
13  
14  
15  
16  
17  
18  
19  
20  
21  
22  
23  
24  
25  
26  
27  
28  
29  
30  
31  
32  
33  
34  
35  
36  
37  
38  
39  
40  
41  
42  
43  
44  
45  
46  
47  
48  
49

1  
2  
3  
4  
5  
6  
7  
8  
9  
10  
11  
12  
13  
14  
15  
16  
17  
18  
19  
20  
21  
22  
23  
24  
25  
26  
27  
28  
29  
30  
31  
32  
33  
34  
35  
36  
37  
38  
39  
40  
41  
42  
43  
44  
45  
46  
47  
48  
49

|                 |            |         |               |          |        |        |       |      |      |              |              |  |
|-----------------|------------|---------|---------------|----------|--------|--------|-------|------|------|--------------|--------------|--|
| <b>al.,</b>     | pilot      |         | sectional     |          |        |        |       |      |      |              | lipoprotein( |  |
| <b>1997</b>     |            |         | Random        |          |        |        |       |      |      |              | a)           |  |
|                 |            |         | Sampling      |          |        |        |       |      |      |              |              |  |
| <b>Bainey</b>   | APPROACH   | Alberta | Retrospective | 1995-    | 19569  | SA:    | SA:   | 635  | 3.2  | Health       | 5            |  |
| <b>et al.,</b>  |            |         | database      | 2006 (11 |        | 78/22, | 22.1, |      |      | status       |              |  |
| <b>2011</b>     |            |         | review        | years)   |        | WC:    | WC:   |      |      | outcomes     |              |  |
|                 |            |         |               |          |        | 74/22  | 26.0  |      |      |              |              |  |
| <b>Banerjee</b> | Hospital   | Toronto | Retrospective | 2 years  | 1200   | SA:    | SA:   | 220  | 18.3 | Maximum      | 3            |  |
| <b>et al.,</b>  | rehabilita |         | database      |          |        | 84.5/  | 56.2, |      |      | metabolic    |              |  |
| <b>2007</b>     | tion       |         | review        |          |        | 15.5,  | WC:   |      |      | equivalents, |              |  |
|                 | records    |         |               |          |        | WC:    | 59.0  |      |      | Cardiac      |              |  |
|                 |            |         |               |          |        | 73.4/  |       |      |      | Rehab        |              |  |
|                 |            |         |               |          |        | 26.6   |       |      |      |              |              |  |
| <b>Banerjee</b> | N/A        | Toronto | Qualitative   | N/A      | 16     | 81.2/  | 57.4  | 16   | 100  | Barriers to  | 2/4          |  |
| <b>et al.,</b>  |            |         | study         |          |        | 18.8   |       |      |      | cardiac      |              |  |
| <b>2010</b>     |            |         |               |          |        |        |       |      |      | rehabilitati |              |  |
|                 |            |         |               |          |        |        |       |      |      | on           |              |  |
|                 |            |         |               |          |        |        |       |      |      | participatio |              |  |
|                 |            |         |               |          |        |        |       |      |      | n            |              |  |
| <b>Chiu et</b>  | NPHS 1996  | Ontario | Retrospective | 1996-    | 163797 | 49.1/  | 42.3  | 3364 | 2.1  | Prevalence   | 3            |  |

|    |                |            |         |               |        |        |       |       |      |     |              |              |
|----|----------------|------------|---------|---------------|--------|--------|-------|-------|------|-----|--------------|--------------|
| 1  |                |            |         |               |        |        |       |       |      |     |              |              |
| 2  |                |            |         |               |        |        |       |       |      |     |              |              |
| 3  | <b>al.,</b>    | & CCHS     |         | review        | 2007   |        | 50.9  |       |      |     |              | of heart     |
| 4  | <b>2010</b>    | cycles 1.1 |         |               | (11    |        |       |       |      |     |              | disease,     |
| 5  |                | (2001),    |         |               | years) |        |       |       |      |     |              | psychosocial |
| 6  |                | 2.1        |         |               |        |        |       |       |      |     |              | stress,      |
| 7  |                | (2003),    |         |               |        |        |       |       |      |     |              | diet,        |
| 8  |                | and 3.1    |         |               |        |        |       |       |      |     |              | physical     |
| 9  |                | (2005)     |         |               |        |        |       |       |      |     |              | activity     |
| 10 |                |            |         |               |        |        |       |       |      |     |              |              |
| 11 | <b>Chiu et</b> | NPHS 1996  | Ontario | Database      | 12.8   | 59824  | WC:   | WC:   | 1001 | 1.7 | Diabetes     | 3            |
| 12 | <b>al.,</b>    | & CCHS     |         | review        | years  |        | 49.1/ | 48.5, |      |     | incidence    |              |
| 13 | <b>2011</b>    | cycles 1.1 |         |               |        |        | 50.9, | SA:   |      |     | rates,       |              |
| 14 |                | (2001),    |         |               |        |        | SA:   | 43.7  |      |     | median age   |              |
| 15 |                | 2.1        |         |               |        |        | 56.8/ |       |      |     | at diagnosis |              |
| 16 |                | (2003),    |         |               |        |        | 43.2  |       |      |     |              |              |
| 17 |                | and 3.1    |         |               |        |        |       |       |      |     |              |              |
| 18 |                | (2005)     |         |               |        |        |       |       |      |     |              |              |
| 19 |                |            |         |               |        |        |       |       |      |     |              |              |
| 20 | <b>Chiu et</b> | NPHS 1996  | Ontario | Retrospective | N/A    | 163797 | 49.1/ | 42    | 3364 | 2.1 | Prevalence   | 3            |
| 21 | <b>al.,</b>    | and CCHS   |         |               |        |        | 50.9  |       |      |     | of CVD risk  |              |
| 22 | <b>2012</b>    | Cycles 1.1 |         | Cohort        |        |        |       |       |      |     | factors      |              |
| 23 |                | (2001),    |         |               |        |        |       |       |      |     |              |              |
| 24 |                | 2.1        |         |               |        |        |       |       |      |     |              |              |
| 25 |                | (2003),    |         |               |        |        |       |       |      |     |              |              |
| 26 |                | 3.1        |         |               |        |        |       |       |      |     |              |              |
| 27 |                |            |         |               |        |        |       |       |      |     |              |              |
| 28 |                |            |         |               |        |        |       |       |      |     |              |              |
| 29 |                |            |         |               |        |        |       |       |      |     |              |              |
| 30 |                |            |         |               |        |        |       |       |      |     |              |              |
| 31 |                |            |         |               |        |        |       |       |      |     |              |              |
| 32 |                |            |         |               |        |        |       |       |      |     |              |              |
| 33 |                |            |         |               |        |        |       |       |      |     |              |              |
| 34 |                |            |         |               |        |        |       |       |      |     |              |              |
| 35 |                |            |         |               |        |        |       |       |      |     |              |              |
| 36 |                |            |         |               |        |        |       |       |      |     |              |              |
| 37 |                |            |         |               |        |        |       |       |      |     |              |              |
| 38 |                |            |         |               |        |        |       |       |      |     |              |              |
| 39 |                |            |         |               |        |        |       |       |      |     |              |              |
| 40 |                |            |         |               |        |        |       |       |      |     |              |              |
| 41 |                |            |         |               |        |        |       |       |      |     |              |              |
| 42 |                |            |         |               |        |        |       |       |      |     |              |              |
| 43 |                |            |         |               |        |        |       |       |      |     |              |              |
| 44 |                |            |         |               |        |        |       |       |      |     |              |              |
| 45 |                |            |         |               |        |        |       |       |      |     |              |              |
| 46 |                |            |         |               |        |        |       |       |      |     |              |              |
| 47 |                |            |         |               |        |        |       |       |      |     |              |              |
| 48 |                |            |         |               |        |        |       |       |      |     |              |              |
| 49 |                |            |         |               |        |        |       |       |      |     |              |              |

1  
2  
3  
4  
5  
6  
7  
8  
9  
10  
11  
12  
13  
14  
15  
16  
17  
18  
19  
20  
21  
22  
23  
24  
25  
26  
27  
28  
29  
30  
31  
32  
33  
34  
35  
36  
37  
38  
39  
40  
41  
42  
43  
44  
45  
46  
47  
48  
49

(2005),  
and 4.1  
(2007)

|                             |        |           |                                                      |     |     |                               |                         |     |      |                                           |   |
|-----------------------------|--------|-----------|------------------------------------------------------|-----|-----|-------------------------------|-------------------------|-----|------|-------------------------------------------|---|
| <b>Gasevic et al., 2012</b> | M-CHAT | Vancouver | Cross-sectional<br>Targeted ethnic group<br>Sampling | N/A | 784 | WC:<br>50/50,<br>SA:<br>50/50 | WC:<br>50,<br>SA:<br>45 | 199 | 2500 | TC, LDL, TG,<br>BMI, FINS,<br>FG, HOMA-IR | 4 |
|-----------------------------|--------|-----------|------------------------------------------------------|-----|-----|-------------------------------|-------------------------|-----|------|-------------------------------------------|---|

|                             |     |           |                                    |     |     |       |      |    |   |                                       |   |
|-----------------------------|-----|-----------|------------------------------------|-----|-----|-------|------|----|---|---------------------------------------|---|
| <b>Graunau et al., 2008</b> | N/A | Vancouver | Cross-sectional<br>Random sampling | N/A | 976 | 44/56 | 55.5 | 67 | 7 | Perception of heart disease in Canada | 2 |
|-----------------------------|-----|-----------|------------------------------------|-----|-----|-------|------|----|---|---------------------------------------|---|

|                            |     |         |                   |     |    |      |              |    |     |                                 |     |
|----------------------------|-----|---------|-------------------|-----|----|------|--------------|----|-----|---------------------------------|-----|
| <b>Grewal et al., 2010</b> | N/A | Ontario | Qualitative study | N/A | 16 | 94/6 | Men:<br>62.6 | 16 | 100 | Cardiac Rehabilitation Referral | 1/4 |
|----------------------------|-----|---------|-------------------|-----|----|------|--------------|----|-----|---------------------------------|-----|

|                            |     |         |                                         |     |     |     |      |    |   |                         |   |
|----------------------------|-----|---------|-----------------------------------------|-----|-----|-----|------|----|---|-------------------------|---|
| <b>Grewal et al., 2010</b> | N/A | Ontario | Cross-sectional<br>Convenience sampling | N/A | 562 | N/A | 61.9 | 53 | 9 | Social support measures | 5 |
|----------------------------|-----|---------|-----------------------------------------|-----|-----|-----|------|----|---|-------------------------|---|

|    |                 |            |             |               |         |       |       |       |      |     |              |   |
|----|-----------------|------------|-------------|---------------|---------|-------|-------|-------|------|-----|--------------|---|
| 1  |                 |            |             |               |         |       |       |       |      |     |              |   |
| 2  |                 |            |             |               |         |       |       |       |      |     |              |   |
| 3  | <b>Gupta et</b> | Hospital   | Brampton    | Retrospective | 1994-   | 1106  | N/A   | SA:   | 553  | 50  | Acute MI,    | 4 |
| 4  | <b>al.,</b>     | chart      | Scarborough | chart review  | 1999 (5 |       |       | 62.6, |      |     | Diabetes,    |   |
| 5  | <b>2002</b>     | review     |             | years)        |         |       |       | Non-  |      |     | Access to    |   |
| 6  |                 |            |             |               |         |       |       | SA:   |      |     | diagnostic   |   |
| 7  |                 |            |             |               |         |       |       | 63.0  |      |     | testing      |   |
| 8  |                 |            |             |               |         |       |       |       |      |     |              |   |
| 9  |                 |            |             |               |         |       |       |       |      |     |              |   |
| 10 |                 |            |             |               |         |       |       |       |      |     |              |   |
| 11 | <b>Kaul et</b>  | Alberta    | Alberta     | Retrospective | 1999-   | 54208 | SA:   | WC:   | 377  | 0.7 | Diabetes,    | 3 |
| 12 | <b>al.,</b>     | Health and |             | cohort        | 2005    |       | 47.2/ | 76.5, |      |     | Hypertension |   |
| 13 | <b>2011</b>     | Wellness   |             |               |         |       | 52.8, | SA:   |      |     | , post-MI    |   |
| 14 |                 | databases  |             |               |         |       | WC:   | 72.2  |      |     | mortality    |   |
| 15 |                 |            |             |               |         |       | 50/50 |       |      |     | rates        |   |
| 16 |                 |            |             |               |         |       |       |       |      |     |              |   |
| 17 |                 |            |             |               |         |       |       |       |      |     |              |   |
| 18 | <b>Khan et</b>  | Hospital   | British     | Retrospective | 1994-   | 41615 | 67/33 | N/A   | 2190 | 5.4 | Diabetes,    | 5 |
| 19 | <b>al.,</b>     | Administra | Columbia    | chart review  | 2003    |       |       |       |      |     | Heart        |   |
| 20 | <b>2010</b>     | tive data  | and Alberta |               |         |       |       |       |      |     | failure,     |   |
| 21 |                 |            |             |               |         |       |       |       |      |     | hypertension |   |
| 22 |                 |            |             |               |         |       |       |       |      |     | ,            |   |
| 23 |                 |            |             |               |         |       |       |       |      |     | revasculariz |   |
| 24 |                 |            |             |               |         |       |       |       |      |     | ation        |   |
| 25 |                 |            |             |               |         |       |       |       |      |     |              |   |
| 26 |                 |            |             |               |         |       |       |       |      |     |              |   |
| 27 |                 |            |             |               |         |       |       |       |      |     |              |   |
| 28 |                 |            |             |               |         |       |       |       |      |     |              |   |
| 29 |                 |            |             |               |         |       |       |       |      |     |              |   |
| 30 |                 |            |             |               |         |       |       |       |      |     |              |   |
| 31 |                 |            |             |               |         |       |       |       |      |     |              |   |
| 32 |                 |            |             |               |         |       |       |       |      |     |              |   |
| 33 |                 |            |             |               |         |       |       |       |      |     |              |   |
| 34 |                 |            |             |               |         |       |       |       |      |     |              |   |
| 35 | <b>Khan, S.</b> | N/A        | 11 acute    | Retrospective | N/A     | 2472  | SA:   | SA:   | 171  | 6.7 | Physical     | 3 |
| 36 | <b>N. et</b>    |            | care        | Cohort        |         |       | 78.4/ | 61.7, |      |     | activity     |   |
| 37 | <b>al.,</b>     |            | hospitals   |               |         |       | 21.6, | WC:   |      |     | environment  |   |
| 38 | <b>2010</b>     |            | in Ontario  |               |         |       | WC:   | 64.4  |      |     |              |   |
| 39 |                 |            |             |               |         |       |       |       |      |     |              |   |
| 40 |                 |            |             |               |         |       |       |       |      |     |              |   |
| 41 |                 |            |             |               |         |       |       |       |      |     |              |   |
| 42 |                 |            |             |               |         |       |       |       |      |     |              |   |
| 43 |                 |            |             |               |         |       |       |       |      |     |              |   |
| 44 |                 |            |             |               |         |       |       |       |      |     |              |   |
| 45 |                 |            |             |               |         |       |       |       |      |     |              |   |
| 46 |                 |            |             |               |         |       |       |       |      |     |              |   |
| 47 |                 |            |             |               |         |       |       |       |      |     |              |   |
| 48 |                 |            |             |               |         |       |       |       |      |     |              |   |
| 49 |                 |            |             |               |         |       |       |       |      |     |              |   |

1  
2  
3  
4  
5  
6  
7  
8  
9  
10  
11  
12  
13  
14  
15  
16  
17  
18  
19  
20  
21  
22  
23  
24  
25  
26  
27  
28  
29  
30  
31  
32  
33  
34  
35  
36  
37  
38  
39  
40  
41  
42  
43  
44  
45  
46  
47  
48  
49

|                          |                                              |                      |                                                |                                           |        |               |  |       |     |                                                       |   |
|--------------------------|----------------------------------------------|----------------------|------------------------------------------------|-------------------------------------------|--------|---------------|--|-------|-----|-------------------------------------------------------|---|
|                          |                                              |                      |                                                |                                           |        | 62.9/         |  |       |     |                                                       |   |
|                          |                                              |                      |                                                |                                           |        | 37.1          |  |       |     |                                                       |   |
| <b>Khan et al., 2011</b> | Hospital discharge data and physician claims | B.C, Alberta, Canada | Database review                                | B.C.: 1993-1996<br><br>Alberta: 1994-2007 | 276237 | N/A           |  | 15066 | 5.4 | Diabetes incidence rates                              | 5 |
| <b>King, 2009</b>        | DAD                                          | Calgary              | Chart review                                   | 2002-2006                                 | 406    |               |  |       |     | BMI, Diabetes, smoking status                         | 4 |
| <b>Kohli et al, 2010</b> | M-CHAT                                       | Vancouver            | Cross-sectional Targeted ethnic group Sampling |                                           | 408    |               |  |       |     | BMI, Waist, body fat %, abdominal fat, smoking status | 5 |
| <b>Lear et al., 2003</b> | M-CHAT                                       | B.C, Canada          | Cross-sectional Targeted                       | N/A                                       | 69     | WC: 36.5, SA: |  | 34    | 49  | BMI, WHR, TC, LDL-C, HDL-C,                           | 2 |



|    |                |        |              |              |     |      |       |     |              |               |
|----|----------------|--------|--------------|--------------|-----|------|-------|-----|--------------|---------------|
|    |                |        | ethnic group |              |     | 38.2 |       |     | Triglyceride |               |
|    |                |        | Sampling     |              |     |      |       |     | s, glucose,  |               |
|    |                |        |              |              |     |      |       |     | insulin, S-  |               |
|    |                |        |              |              |     |      |       |     | BP, D-BP, C- |               |
|    |                |        |              |              |     |      |       |     | reactive     |               |
|    |                |        |              |              |     |      |       |     | protein      |               |
| 15 | <b>Lear et</b> | M-CHAT | Vancouver    | Cross-       | N/A | 627  | WC:   | 207 | 33           | BMI, Waist, 4 |
| 16 | <b>al.,</b>    |        |              | sectional    |     |      | 50.3, |     |              | WHR, Body     |
| 17 | <b>2007</b>    |        |              | Targeted     |     |      | SA:   |     |              | fat (%),      |
| 18 |                |        |              | ethnic group |     |      | 45.0  |     |              | abdominal     |
| 19 |                |        |              | Sampling     |     |      |       |     |              | fat,          |
| 20 |                |        |              |              |     |      |       |     |              | smoking(%),   |
| 21 |                |        |              |              |     |      |       |     |              | diabetes (%)  |
| 27 | <b>Lear et</b> | M-CHAT | Vancouver    | Cross-       | N/A | 822  | WC:   | 207 | 25.1         | Diet, BMI, 5  |
| 28 | <b>al.,</b>    |        |              | sectional    |     |      | 50.3, |     |              | WHR, energy   |
| 29 | <b>2007</b>    |        |              | Targeted     |     |      | SA:   |     |              | intake,       |
| 30 |                |        |              | ethnic group |     |      | 45.0  |     |              | physical      |
| 31 |                |        |              | Sampling     |     |      |       |     |              | activity      |
| 37 | <b>Lear et</b> | M-CHAT | B.C, Canada  | Cross-       | N/A | 828  |       | 208 | 25.1         | BMI, WC, 5    |
| 38 | <b>al.,</b>    |        | (as part of  | sectional    |     |      |       |     |              | WHR, body     |
| 39 |                |        |              |              |     |      |       |     |              | fat %,        |

1  
2  
3  
4  
5  
6  
7  
8  
9  
10  
11  
12  
13  
14  
15  
16  
17  
18  
19  
20  
21  
22  
23  
24  
25  
26  
27  
28  
29  
30  
31  
32  
33  
34  
35  
36  
37  
38  
39  
40  
41  
42  
43  
44  
45  
46  
47  
48  
49

---

2009 MCHAT) Targeted abdominal  
ethnic group fat mass,  
Sampling current  
smoking

|                          |        |           |                                                         |     |     |       |                                                                                              |     |    |                                                       |   |
|--------------------------|--------|-----------|---------------------------------------------------------|-----|-----|-------|----------------------------------------------------------------------------------------------|-----|----|-------------------------------------------------------|---|
| <b>Lear et al., 2012</b> | M-CHAT | Vancouver | Cross-sectional<br>Targeted<br>ethnic group<br>Sampling | N/A | 408 | 50/50 | WC<br>Men:<br>49.8,<br>WC<br>Women<br>:50.7<br>, SA<br>Men:<br>44.6,<br>SA<br>Women<br>:45.4 | 207 | 51 | Total fat,<br>LDL-C, HDL-C, TC,<br>TC:HDL,<br>smoking | 5 |
|--------------------------|--------|-----------|---------------------------------------------------------|-----|-----|-------|----------------------------------------------------------------------------------------------|-----|----|-------------------------------------------------------|---|

**Liu et al., 2010** CCHS 2000, Canada Retrospective cohort 3 cycles of CCHS; 2000, 2003, 2005 37,154 SA: 52/48, WC: 48/52 4270 11 Diabetes, Hypertension, Smoking, BMI 4

---

|    |                 |            |             |             |         |      |        |      |     |      |              |   |
|----|-----------------|------------|-------------|-------------|---------|------|--------|------|-----|------|--------------|---|
| 1  |                 |            |             |             |         |      |        |      |     |      |              |   |
| 2  |                 |            |             |             |         |      |        |      |     |      |              |   |
| 3  | <b>He et</b>    |            | Toronto     | Cross-      | 2003-   | 354  | SA:    | N/A  | 113 | 32   | BMI, waist,  | 4 |
| 4  |                 |            |             |             |         |      |        |      |     |      |              |   |
| 5  | <b>al.,</b>     |            | London      | sectional   | 2006 (3 |      | 43/57, |      |     |      | WHR, body    |   |
| 6  |                 |            |             |             |         |      |        |      |     |      |              |   |
| 7  | <b>2010</b>     |            | Cambridge   | Convenience | years)  |      | WC:    |      |     |      | fat %, SBP,  |   |
| 8  |                 |            |             |             |         |      |        |      |     |      |              |   |
| 9  |                 |            |             | sampling    |         |      | 49/51  |      |     |      | DBP, TC,     |   |
| 10 |                 |            |             |             |         |      |        |      |     |      | HDL-C, LDL-  |   |
| 11 |                 |            |             |             |         |      |        |      |     |      | C, FG, FINS, |   |
| 12 |                 |            |             |             |         |      |        |      |     |      | TG,          |   |
| 13 |                 |            |             |             |         |      |        |      |     |      | hypertension |   |
| 14 |                 |            |             |             |         |      |        |      |     |      | , IFG, HOMO- |   |
| 15 |                 |            |             |             |         |      |        |      |     |      | IR,          |   |
| 16 |                 |            |             |             |         |      |        |      |     |      |              |   |
| 17 |                 |            |             |             |         |      |        |      |     |      |              |   |
| 18 |                 |            |             |             |         |      |        |      |     |      |              |   |
| 19 |                 |            |             |             |         |      |        |      |     |      |              |   |
| 20 |                 |            |             |             |         |      |        |      |     |      |              |   |
| 21 | <b>Mente et</b> | SHARE/     | Toronto     | Cross-      | N/A     | 1176 | N/A    | 50.3 | 317 | 27   | Adiponectin, | 6 |
| 22 |                 |            |             |             |         |      |        |      |     |      |              |   |
| 23 | <b>al.,</b>     | SHARE-AP   | EdmontonHam | sectional   |         |      |        |      |     |      | Leptin,      |   |
| 24 |                 |            |             |             |         |      |        |      |     |      |              |   |
| 25 | <b>2010</b>     |            | ilton       | Random      |         |      |        |      |     |      | HOMA- IR     |   |
| 26 |                 |            |             |             |         |      |        |      |     |      |              |   |
| 27 |                 |            | Oshweken    | Sampling    |         |      |        |      |     |      |              |   |
| 28 |                 |            |             |             |         |      |        |      |     |      |              |   |
| 29 |                 |            |             |             |         |      |        |      |     |      |              |   |
| 30 | <b>Merchant</b> | SHARE/SHAR | Toronto,    | Cross-      | 1996-   | 620  | 47/53  |      | 174 | 28.1 | WHR, BMI,    | 5 |
| 31 |                 |            |             |             |         |      |        |      |     |      |              |   |
| 32 | <b>et al.,</b>  | E-AP       | HamiltonEdm | sectional   | 1998    |      |        |      |     |      | smoking      |   |
| 33 |                 |            |             |             |         |      |        |      |     |      |              |   |
| 34 | <b>2007</b>     |            | ontonSix    | Random      |         |      |        |      |     |      | status,      |   |
| 35 |                 |            | Nations     | Sampling    |         |      |        |      |     |      | physical     |   |
| 36 |                 |            |             |             |         |      |        |      |     |      | activity     |   |
| 37 |                 |            |             |             |         |      |        |      |     |      | score, diet  |   |
| 38 |                 |            |             |             |         |      |        |      |     |      |              |   |
| 39 |                 |            |             |             |         |      |        |      |     |      |              |   |
| 40 |                 |            |             |             |         |      |        |      |     |      |              |   |
| 41 |                 |            |             |             |         |      |        |      |     |      |              |   |
| 42 |                 |            |             |             |         |      |        |      |     |      |              |   |
| 43 |                 |            |             |             |         |      |        |      |     |      |              |   |
| 44 |                 |            |             |             |         |      |        |      |     |      |              |   |
| 45 |                 |            |             |             |         |      |        |      |     |      |              |   |
| 46 |                 |            |             |             |         |      |        |      |     |      |              |   |
| 47 |                 |            |             |             |         |      |        |      |     |      |              |   |
| 48 |                 |            |             |             |         |      |        |      |     |      |              |   |
| 49 |                 |            |             |             |         |      |        |      |     |      |              |   |

1  
2  
3  
4  
5  
6  
7  
8  
9  
10  
11  
12  
13  
14  
15  
16  
17  
18  
19  
20  
21  
22  
23  
24  
25  
26  
27  
28  
29  
30  
31  
32  
33  
34  
35  
36  
37  
38  
39  
40  
41  
42  
43  
44  
45  
46  
47  
48  
49

|                                |                              |                          |                            |                      |                             |                         |                    |        |      |                                                  |   |
|--------------------------------|------------------------------|--------------------------|----------------------------|----------------------|-----------------------------|-------------------------|--------------------|--------|------|--------------------------------------------------|---|
| <b>Merchant</b>                | SHARE                        | Hamilton                 | Cross-sectional            | N/A                  | 617                         | 47/53                   | 47.72              | 173    | 28   | Diet                                             | 5 |
| <b>, 2005</b>                  |                              |                          | Random Sampling            |                      |                             |                         |                    |        |      |                                                  |   |
| <b>Nijjar et al., 2010</b>     | DAD                          | British Columbia Alberta | Retrospective cohort       | 1995-2002            | 41615                       |                         |                    | 2190   | 5.2  | Diabetes, hypertension                           | 5 |
| <b>Nijjar et al., 2010</b>     | DAD                          | British Columbia         | Retrospective chart review | 1995-2002 (7 years)  | 2,168,715 (34848 AMI cases) | 67/33                   | N/A                | 87,965 | 4.1  | Acute MI hospitalization rates                   | 4 |
| <b>O'Laughlin et al., 2007</b> |                              | Montreal                 | Retrospective              | 1993-1997 (4 years)  | 2033                        | 42/58                   | 39.7               | 42     | 3    | Smoking, obesity, physical inactivity, poor diet | 2 |
| <b>Prasad et al., 2011</b>     | Kidney transplant recipients | Toronto                  | Retrospective Cohort       | 1998-2009 (11 years) | 864                         | SA: 106/11. WC: 346/204 | SA: 48.4, WC: 47.1 | 139    | 16.1 | Smoking Status                                   | 4 |

|    |                 |           |          |               |          |       |        |       |       |      |              |   |
|----|-----------------|-----------|----------|---------------|----------|-------|--------|-------|-------|------|--------------|---|
| 1  |                 |           |          |               |          |       |        |       |       |      |              |   |
| 2  |                 |           |          |               |          |       |        |       |       |      |              |   |
| 3  | <b>Quan et</b>  | APPROACH  | Alberta  | Database      | 1995-    | 81848 | SA:    | N/A   | 3061  | 3.7  | Revasculariz | 5 |
| 4  | <b>al.,</b>     | and BCCR  | British  | review        | 2004 (9  |       | 77.4/  |       |       |      | ation, 30-   |   |
| 5  | <b>2010</b>     |           | Columbia |               | years)   |       | 22.3,  |       |       |      | day          |   |
| 6  |                 |           |          |               |          |       | WC:    |       |       |      | mortality    |   |
| 7  |                 |           |          |               |          |       | 75/25  |       |       |      |              |   |
| 8  |                 |           |          |               |          |       |        |       |       |      |              |   |
| 9  |                 |           |          |               |          |       |        |       |       |      |              |   |
| 10 |                 |           |          |               |          |       |        |       |       |      |              |   |
| 11 |                 |           |          |               |          |       |        |       |       |      |              |   |
| 12 | <b>Razak et</b> | SHARE     | Toronto  | Cross-        | N/A      | 1078  | SA:    | SA:   | 289   | 27   | BMI, waist,  | 6 |
| 13 | <b>al.,</b>     |           | Edmonton | sectional     |          |       | 55/45, | 49,   |       |      | FG, HbA1c,   |   |
| 14 | <b>2007</b>     |           | Hamilton | Random        |          |       | WC:    | WC:   |       |      | HOMA-IR,     |   |
| 15 |                 |           | Oshweken | Sampling      |          |       | 48/52  | 51    |       |      | LDL-C, HDL-C |   |
| 16 |                 |           |          |               |          |       |        |       |       |      |              |   |
| 17 |                 |           |          |               |          |       |        |       |       |      |              |   |
| 18 |                 |           |          |               |          |       |        |       |       |      |              |   |
| 19 |                 |           |          |               |          |       |        |       |       |      |              |   |
| 20 | <b>Razak et</b> | SHARE     | Toronto  | Cross-        | N/A      | 1251  | SA:    | SA:   | 328   | 59   | FG, HbA1c,   | 6 |
| 21 | <b>al.,</b>     |           | Edmonton | sectional     |          |       | 54/46, | 49.3, |       |      | SBP, DBP,    |   |
| 22 | <b>2005</b>     |           | Hamilton | Random        |          |       | WC:    | WC:   |       |      | BMI, WHR,    |   |
| 23 |                 |           | Oshweken | Sampling      |          |       | 48/52  | 51.3  |       |      | Waist        |   |
| 24 |                 |           |          |               |          |       |        |       |       |      |              |   |
| 25 |                 |           |          |               |          |       |        |       |       |      |              |   |
| 26 |                 |           |          |               |          |       |        |       |       |      |              |   |
| 27 |                 |           |          |               |          |       |        |       |       |      |              |   |
| 28 |                 |           |          |               |          |       |        |       |       |      |              |   |
| 29 | <b>Raghavan</b> |           | Montreal | Chart Review  | 1995-    | 130   | 92/8   | 59.7  | 65    | 50   | All-cause    | 4 |
| 30 | <b>et al.,</b>  |           |          |               | 2000 (5  |       |        |       |       |      | mortality    |   |
| 31 | <b>2008</b>     |           |          |               | years)   |       |        |       |       |      |              |   |
| 32 |                 |           |          |               |          |       |        |       |       |      |              |   |
| 33 |                 |           |          |               |          |       |        |       |       |      |              |   |
| 34 |                 |           |          |               |          |       |        |       |       |      |              |   |
| 35 | <b>Sheth et</b> | Canadian  | Hamilton | Retrospective | 15 years | 32537 | N/A    | N/A   | 10989 | 29.6 | Mortality    | 5 |
| 36 | <b>al.,</b>     | mortality |          | cohort        |          |       |        |       |       |      | rates        |   |
| 37 | <b>1997</b>     | database  |          |               |          |       |        |       |       |      |              |   |
| 38 |                 |           |          |               |          |       |        |       |       |      |              |   |
| 39 |                 |           |          |               |          |       |        |       |       |      |              |   |
| 40 |                 |           |          |               |          |       |        |       |       |      |              |   |
| 41 |                 |           |          |               |          |       |        |       |       |      |              |   |
| 42 |                 |           |          |               |          |       |        |       |       |      |              |   |
| 43 |                 |           |          |               |          |       |        |       |       |      |              |   |
| 44 |                 |           |          |               |          |       |        |       |       |      |              |   |
| 45 |                 |           |          |               |          |       |        |       |       |      |              |   |
| 46 |                 |           |          |               |          |       |        |       |       |      |              |   |
| 47 |                 |           |          |               |          |       |        |       |       |      |              |   |
| 48 |                 |           |          |               |          |       |        |       |       |      |              |   |
| 49 |                 |           |          |               |          |       |        |       |       |      |              |   |

1  
2  
3  
4  
5  
6  
7  
8  
9  
10  
11  
12  
13  
14  
15  
16  
17  
18  
19  
20  
21  
22  
23  
24  
25  
26  
27  
28  
29  
30  
31  
32  
33  
34  
35  
36  
37  
38  
39  
40  
41  
42  
43  
44  
45  
46  
47  
48  
49

|                           |                             |          |                                      |                     |        |                          |                        |      |      |                                                                                  |   |
|---------------------------|-----------------------------|----------|--------------------------------------|---------------------|--------|--------------------------|------------------------|------|------|----------------------------------------------------------------------------------|---|
| <b>Sheth et al., 1999</b> | Canadian mortality database | Canada   | Retrospective cohort                 | 1979-1993           | 949859 |                          |                        | 6548 | 0.68 | CVD mortality rates                                                              | 5 |
| <b>Singh et al., 2005</b> | Hospital chart review       | Toronto  | Retrospective cohort                 | 1997-1999 (2 years) | 887    | SA: 51/49, Non-SA: 50/50 | SA: 69.1, Non-SA: 75.1 | 90   | 12   | Smoking, post-MI mortality rates                                                 | 3 |
| <b>Smith et al., 2006</b> |                             | Montreal | Cross-sectional Convenience sampling | 2004-2005 (1 year)  | 165    | 52/48                    |                        | 82   | 50   | BMI, body fat %, WHR, Waist, TC, HDL-C, TC:HDL-C, ApoB/ApoA1, smoking status, FG | 3 |
| <b>Smith et al., 2006</b> |                             | Montreal | Cross-sectional Convenience sampling | 2004-2005 (1 year)  | 114    | 61/39                    |                        | 65   | 57   | ApoB, ApoA1, diabetes                                                            | 3 |

|    |                 |            |             |               |           |       |        |       |      |             |              |   |
|----|-----------------|------------|-------------|---------------|-----------|-------|--------|-------|------|-------------|--------------|---|
| 1  |                 |            |             |               |           |       |        |       |      |             |              |   |
| 2  |                 |            |             |               |           |       |        |       |      |             |              |   |
| 3  | <b>Smith et</b> | Quebec     | Cross-      | 2004-         | 86        | N/A   | SA:    | 54    | 62.8 | Body        | 3            |   |
| 4  | <b>al.,</b>     |            | sectional   | 2005 (1       |           |       | 42.9   |       |      | composition |              |   |
| 5  | <b>2006</b>     |            | Convenience | year)         |           |       | WC:    |       |      |             |              |   |
| 6  |                 |            | sampling    |               |           |       | 38.3   |       |      |             |              |   |
| 7  |                 |            |             |               |           |       |        |       |      |             |              |   |
| 8  |                 |            |             |               |           |       |        |       |      |             |              |   |
| 9  |                 |            |             |               |           |       |        |       |      |             |              |   |
| 10 |                 |            |             |               |           |       |        |       |      |             |              |   |
| 11 | <b>Kayaniyi</b> | Ontario    | Cross-      | N/A           | 351       | 73/27 |        |       |      | Cardiac     | 3            |   |
| 12 | <b>l et</b>     |            | sectional   |               |           |       |        |       |      | knowledge   |              |   |
| 13 | <b>al.,</b>     |            | Convenience |               |           |       |        |       |      |             |              |   |
| 14 | <b>2009</b>     |            | Sampling    |               |           |       |        |       |      |             |              |   |
| 15 |                 |            |             |               |           |       |        |       |      |             |              |   |
| 16 |                 |            |             |               |           |       |        |       |      |             |              |   |
| 17 |                 |            |             |               |           |       |        |       |      |             |              |   |
| 18 |                 |            |             |               |           |       |        |       |      |             |              |   |
| 19 |                 |            |             |               |           |       |        |       |      |             |              |   |
| 20 | <b>Booth et</b> | Administra | Toronto     | Retrospective | 1,239,262 | 50/50 |        |       |      | Walkability | 4            |   |
| 21 | <b>al.,</b>     | tive       |             | Cohort        |           |       |        |       |      | score       |              |   |
| 22 | <b>2012</b>     | database   |             |               |           |       |        |       |      |             |              |   |
| 23 |                 |            |             |               |           |       |        |       |      |             |              |   |
| 24 |                 |            |             |               |           |       |        |       |      |             |              |   |
| 25 |                 |            |             |               |           |       |        |       |      |             |              |   |
| 26 | <b>Brister</b>  | Chart      | Toronto     | Retrospective | 1994-     | 6,191 | SA:    | SA:   | 1163 | 19          | CABG         | 4 |
| 27 | <b>et</b>       | Review     |             | Cohort        | 2003      |       | 22/78, | 60.8, |      |             | utilization, |   |
| 28 | <b>al.,2007</b> |            |             |               |           |       | WC:    | WC:   |      |             | post CABG    |   |
| 29 |                 |            |             |               |           |       | 22/78  | 63.6  |      |             | mortality    |   |
| 30 |                 |            |             |               |           |       |        |       |      |             |              |   |
| 31 |                 |            |             |               |           |       |        |       |      |             |              |   |
| 32 |                 |            |             |               |           |       |        |       |      |             |              |   |
| 33 |                 |            |             |               |           |       |        |       |      |             |              |   |
| 34 |                 |            |             |               |           |       |        |       |      |             |              |   |

Table 1. Study Characteristics

1  
2  
3  
4  
5  
6  
7  
8  
9  
10  
11  
12  
13  
14  
15  
16  
17  
18  
19  
20  
21  
22  
23  
24  
25  
26  
27  
28  
29  
30  
31  
32  
33  
34  
35  
36  
37  
38  
39  
40  
41  
42  
43  
44  
45  
46  
47  
48  
49

Figure 1. CONSORT diagram of flow of studies through selection process.

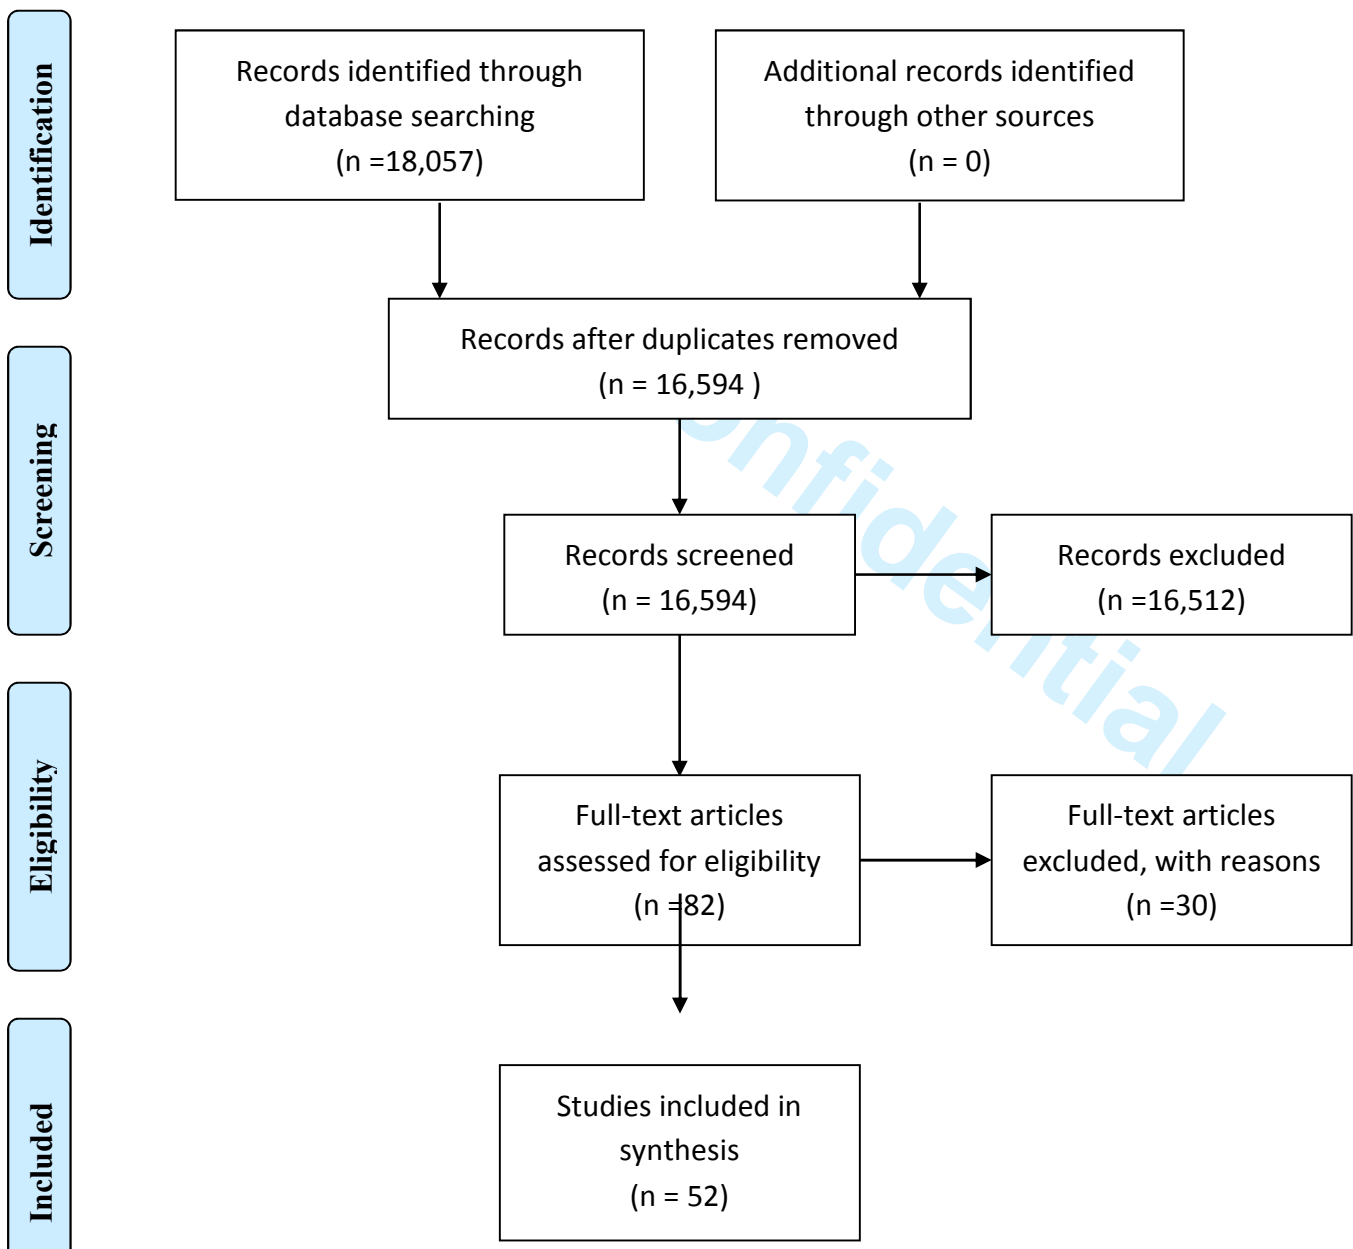



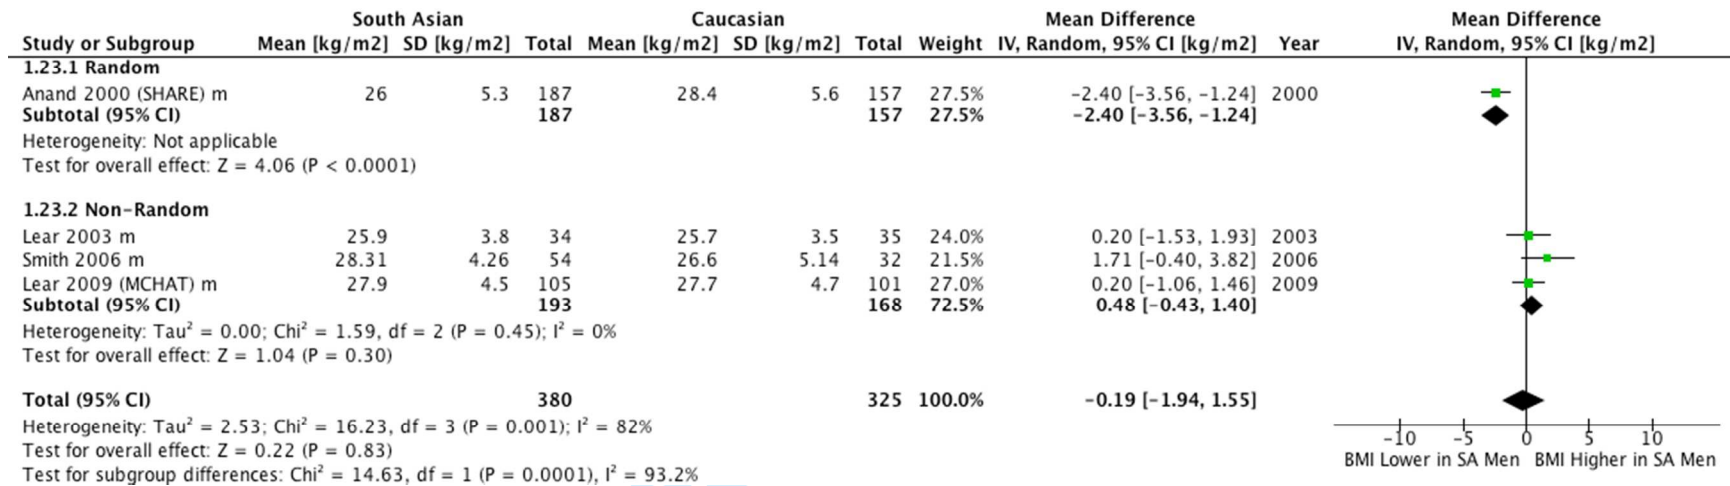Figure 2. Forest plot of comparison: SA vs. WC, outcome: BMI [kg/m<sup>2</sup>] men.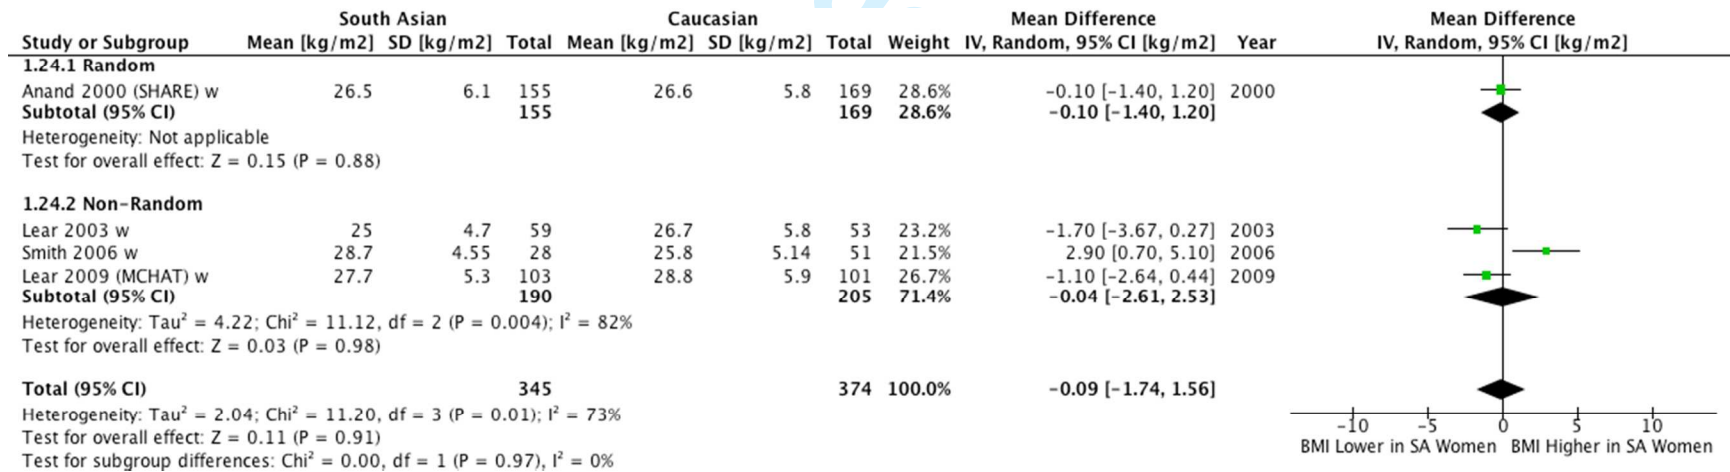Figure 3. Forest plot of comparison: SA vs. WC, outcome: BMI [kg/m<sup>2</sup>] women.

1  
2  
3  
4  
5  
6  
7  
8  
9  
10  
11  
12  
13  
14  
15  
16  
17  
18  
19  
20  
21  
22  
23  
24  
25  
26  
27  
28  
29  
30  
31  
32  
33  
34  
35  
36  
37  
38  
39  
40  
41  
42  
43  
44  
45  
46  
47  
48  
49

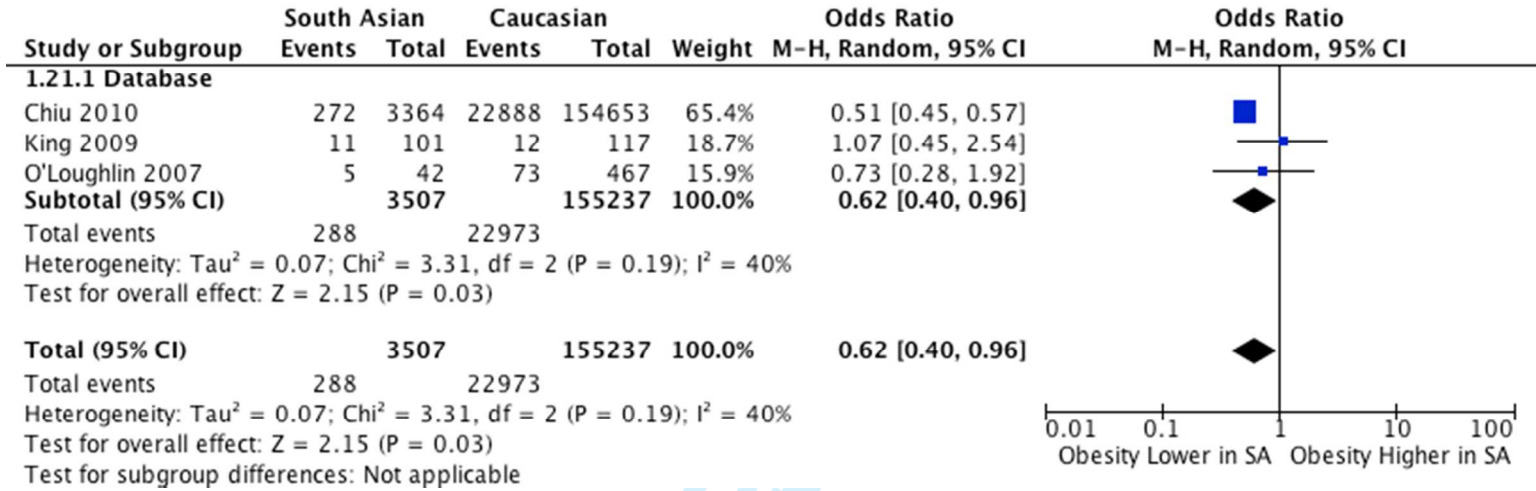

Figure 4. Forest plot of comparison: SA vs. WC, outcome: Obesity

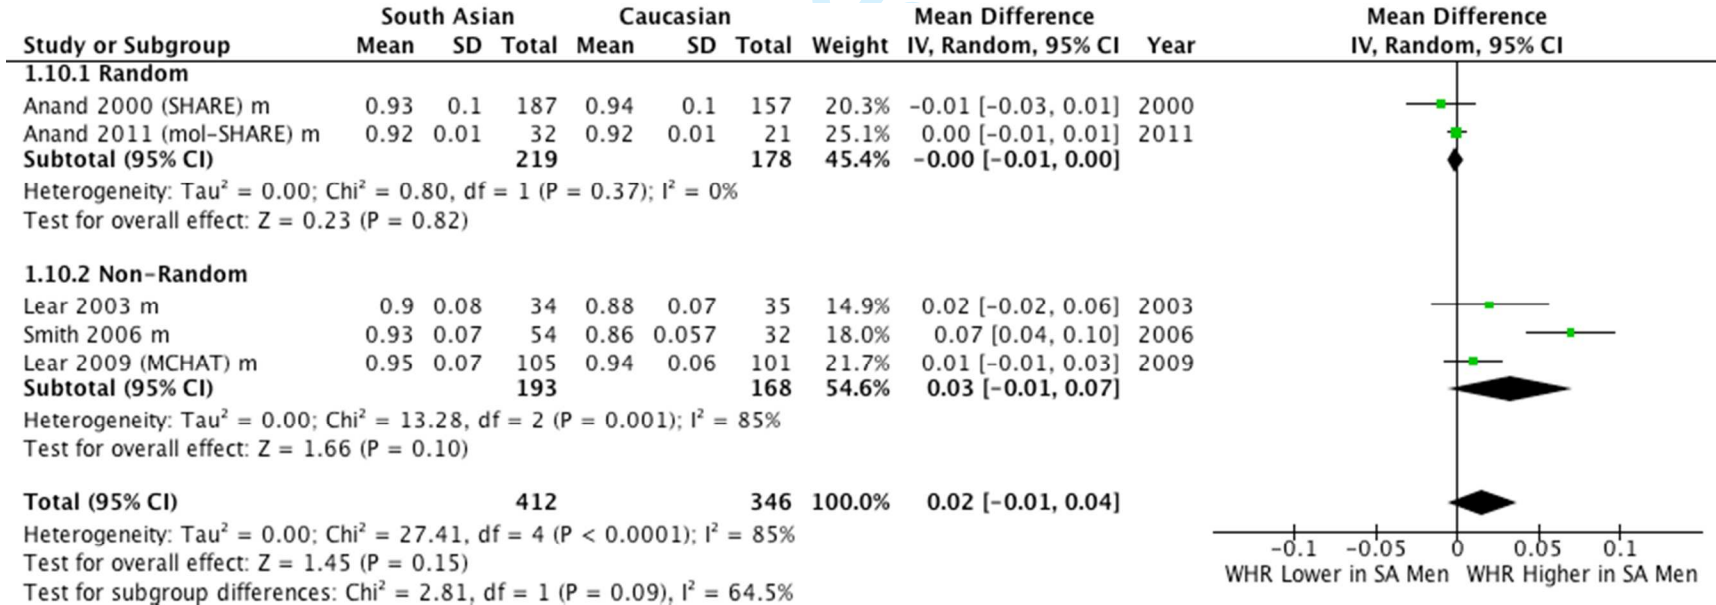

Figure 5. Forest plot of comparison: SA vs. WC, outcome: WHR men

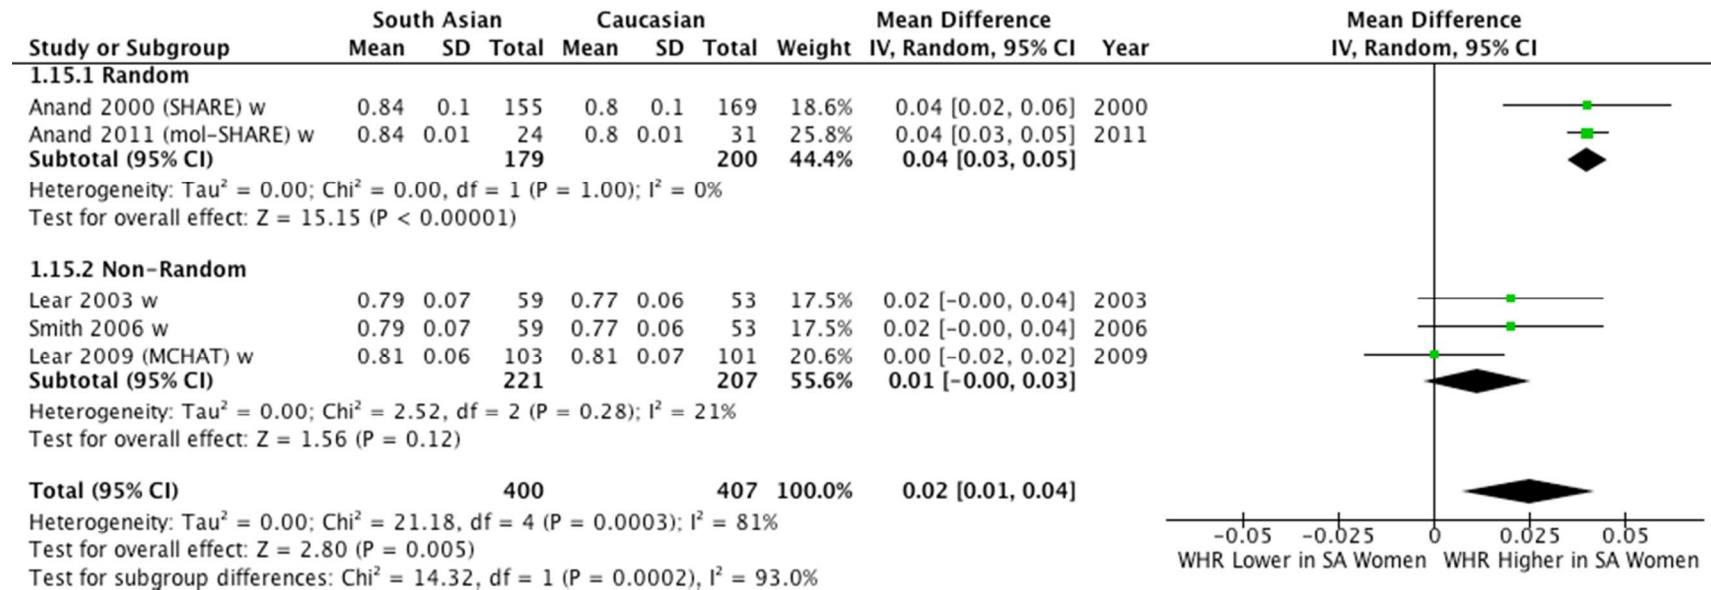

Figure 6. Forest plot of comparison: SA vs. WC, outcome: WHR women

1  
2  
3  
4  
5  
6  
7  
8  
9  
10  
11  
12  
13  
14  
15  
16  
17  
18  
19  
20  
21  
22  
23  
24  
25  
26  
27  
28  
29  
30  
31  
32  
33  
34  
35  
36  
37  
38  
39  
40  
41  
42  
43  
44  
45  
46  
47  
48  
49

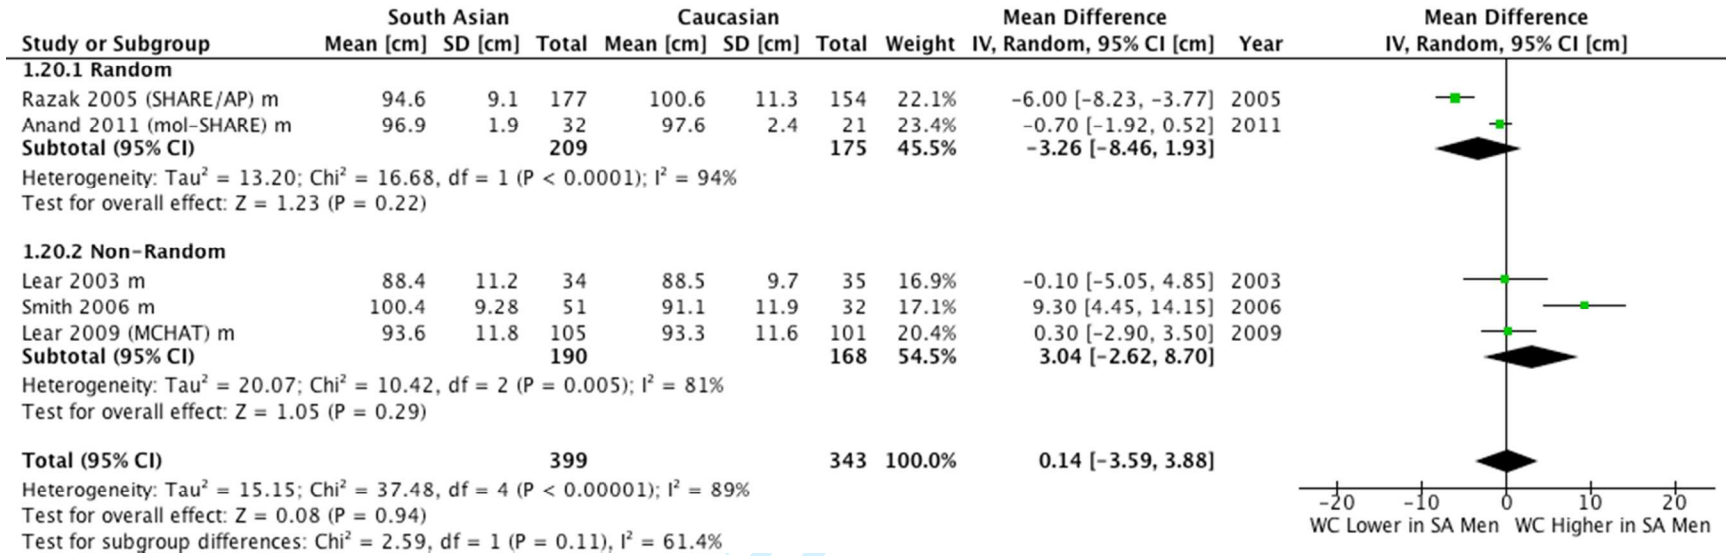

Figure 7. Forest plot of comparison: SA vs. WC, outcome: Waist Circumference [cm] men

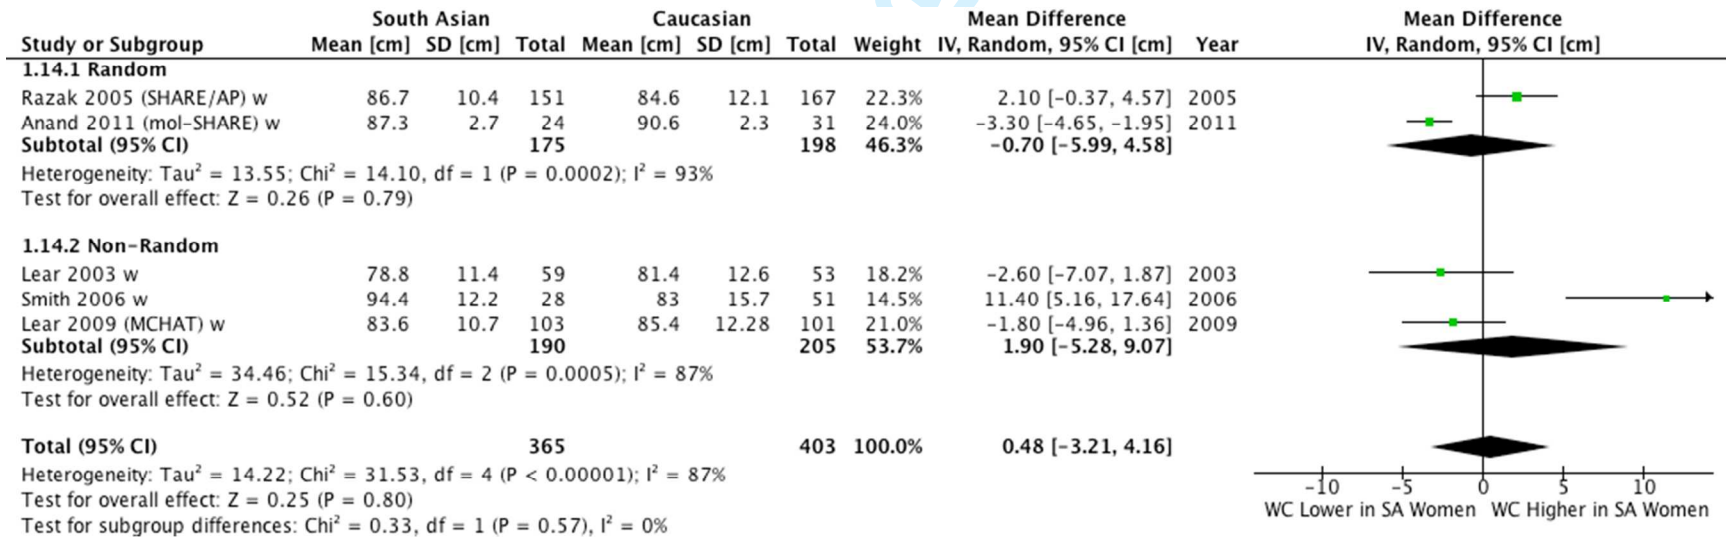

Figure 8. Forest plot of comparison: SA vs. WC, outcome: Waist Circumference [cm] women

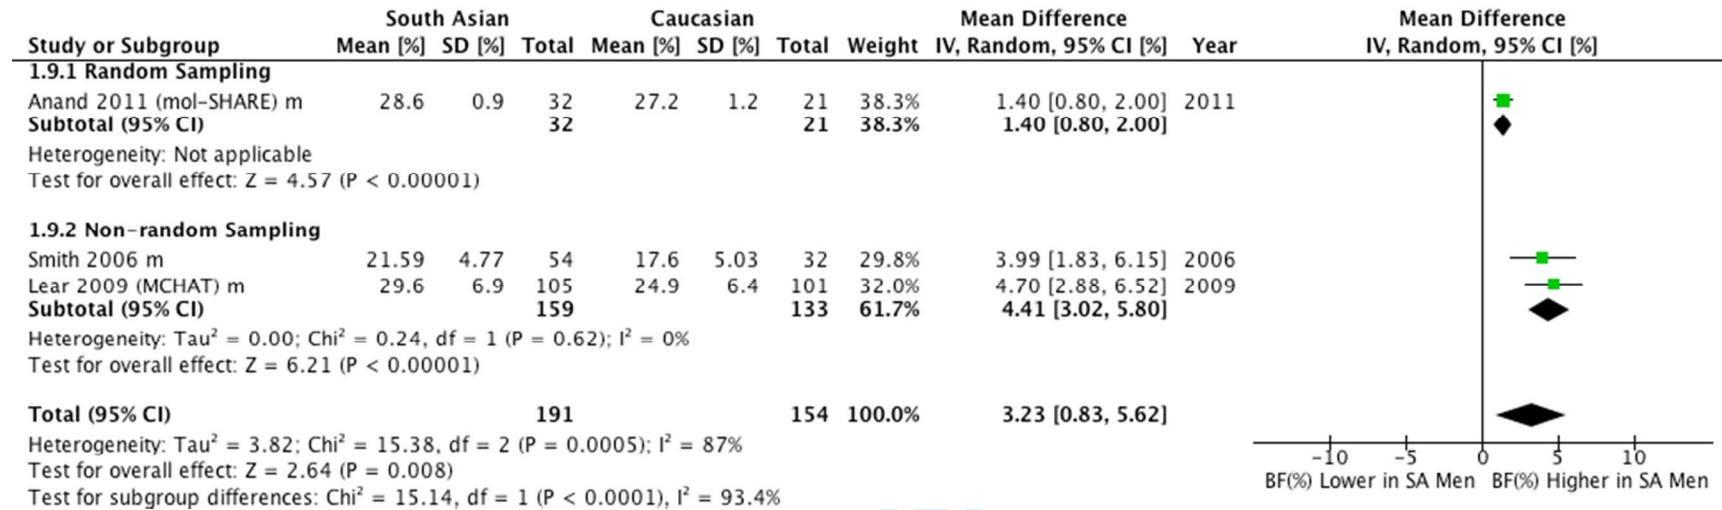

Figure 9. Forest plot of comparison: SA vs. WC, outcome: Body Fat [%] men

1  
2  
3  
4  
5  
6  
7  
8  
9  
10  
11  
12  
13  
14  
15  
16  
17  
18  
19  
20  
21  
22  
23  
24  
25  
26  
27  
28  
29  
30  
31  
32  
33  
34  
35  
36  
37  
38  
39  
40  
41  
42  
43  
44  
45  
46  
47  
48  
49

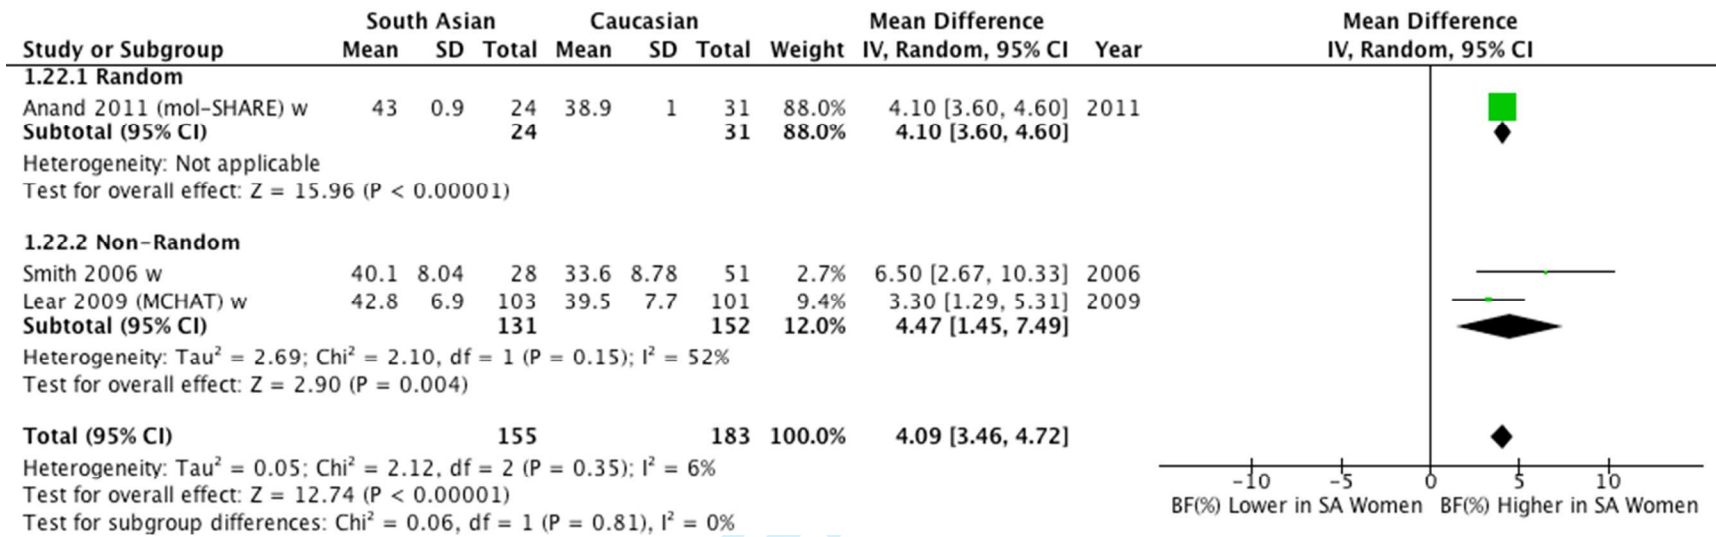

Figure 10. Forest plot of comparison: SA vs. WC, outcome: Body Fat [%] women

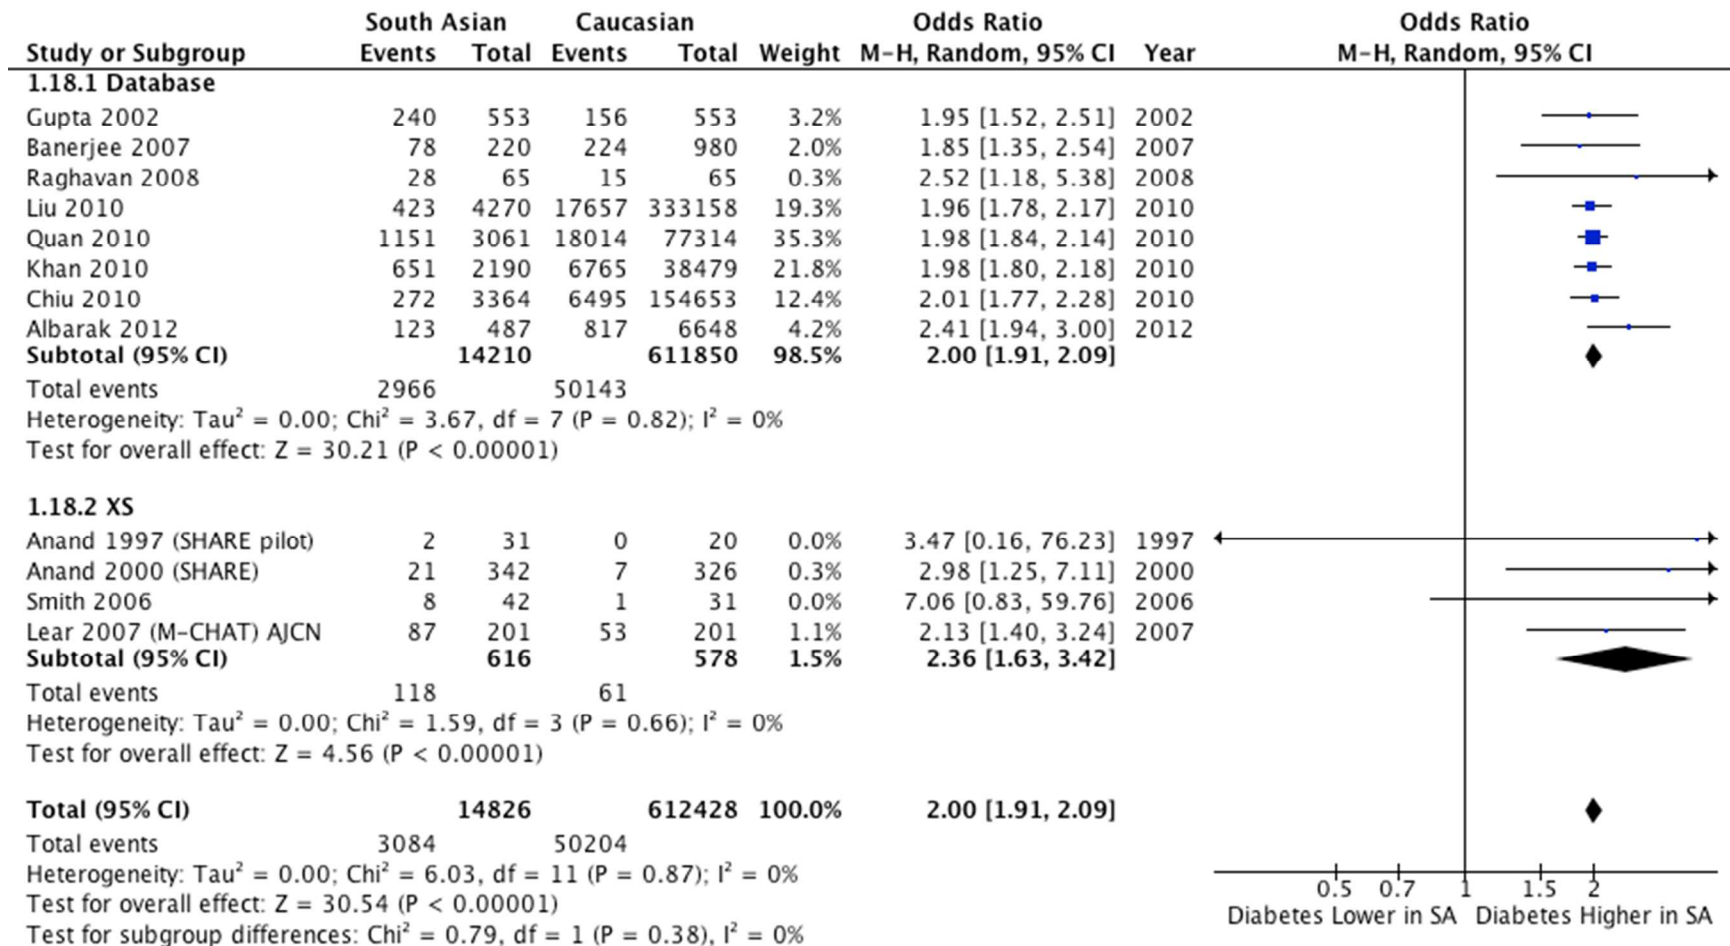

Figure 11. Forest plot of comparison: SA vs. WC, outcome: Diabetes

1  
2  
3  
4  
5  
6  
7  
8  
9  
10  
11  
12  
13  
14  
15  
16  
17  
18  
19  
20  
21  
22  
23  
24  
25  
26  
27  
28  
29  
30  
31  
32  
33  
34  
35  
36  
37  
38  
39  
40  
41  
42  
43  
44  
45  
46  
47  
48  
49

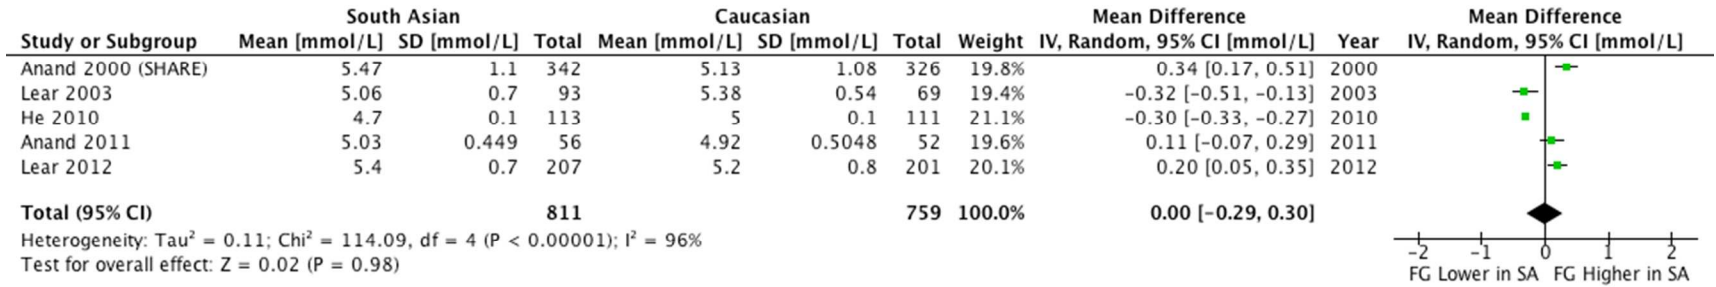

Figure 12. Forest plot of comparison: SA vs. WC, outcome: Fasting Blood Glucose [mmol/L].

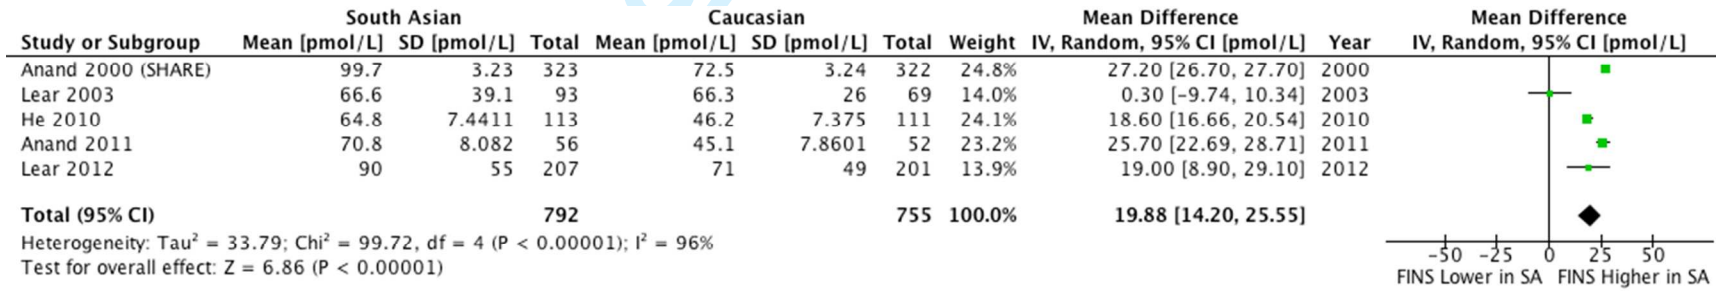

Figure 13. Forest plot of comparison: SA vs. WC, outcome: Fasting Insulin [pmol/L].



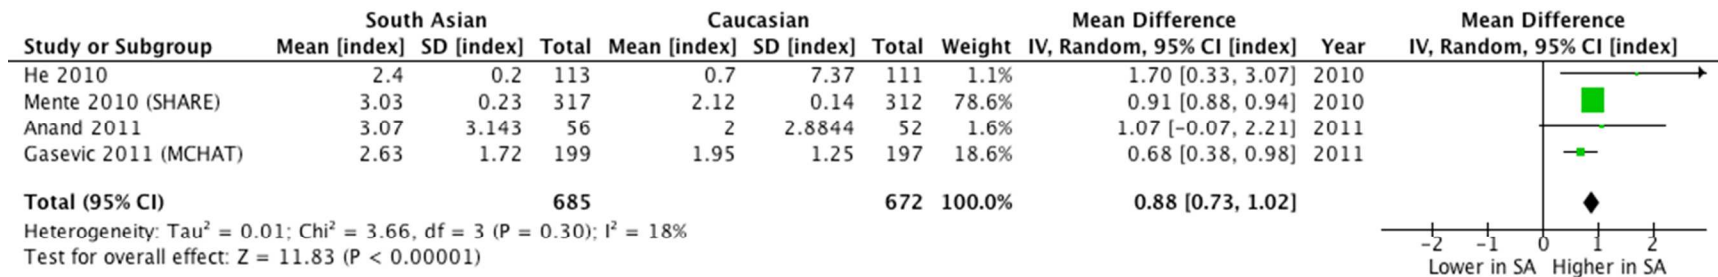

Figure 14. Forest plot of comparison: SA vs. WC, outcome: HOMA-IR

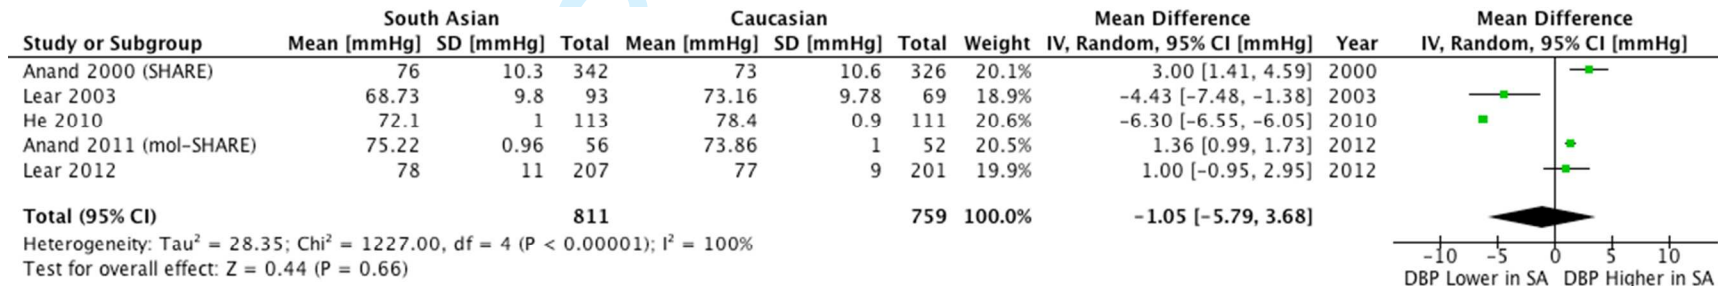

Figure 15. Forest plot of comparison: SA vs. WC, outcome: DBP [mmHg].

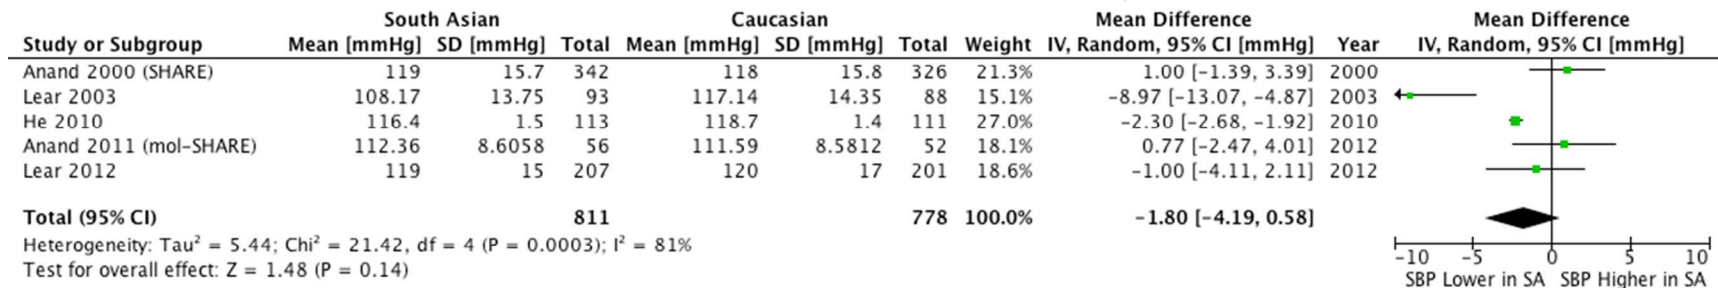

Figure 16. Forest plot of comparison: SA vs. WC, outcome: SBP [mmHg].

1  
2  
3  
4  
5  
6  
7  
8  
9  
10  
11  
12  
13  
14  
15  
16  
17  
18  
19  
20  
21  
22  
23  
24  
25  
26  
27  
28  
29  
30  
31  
32  
33  
34  
35  
36  
37  
38  
39  
40  
41  
42  
43  
44  
45  
46  
47  
48  
49

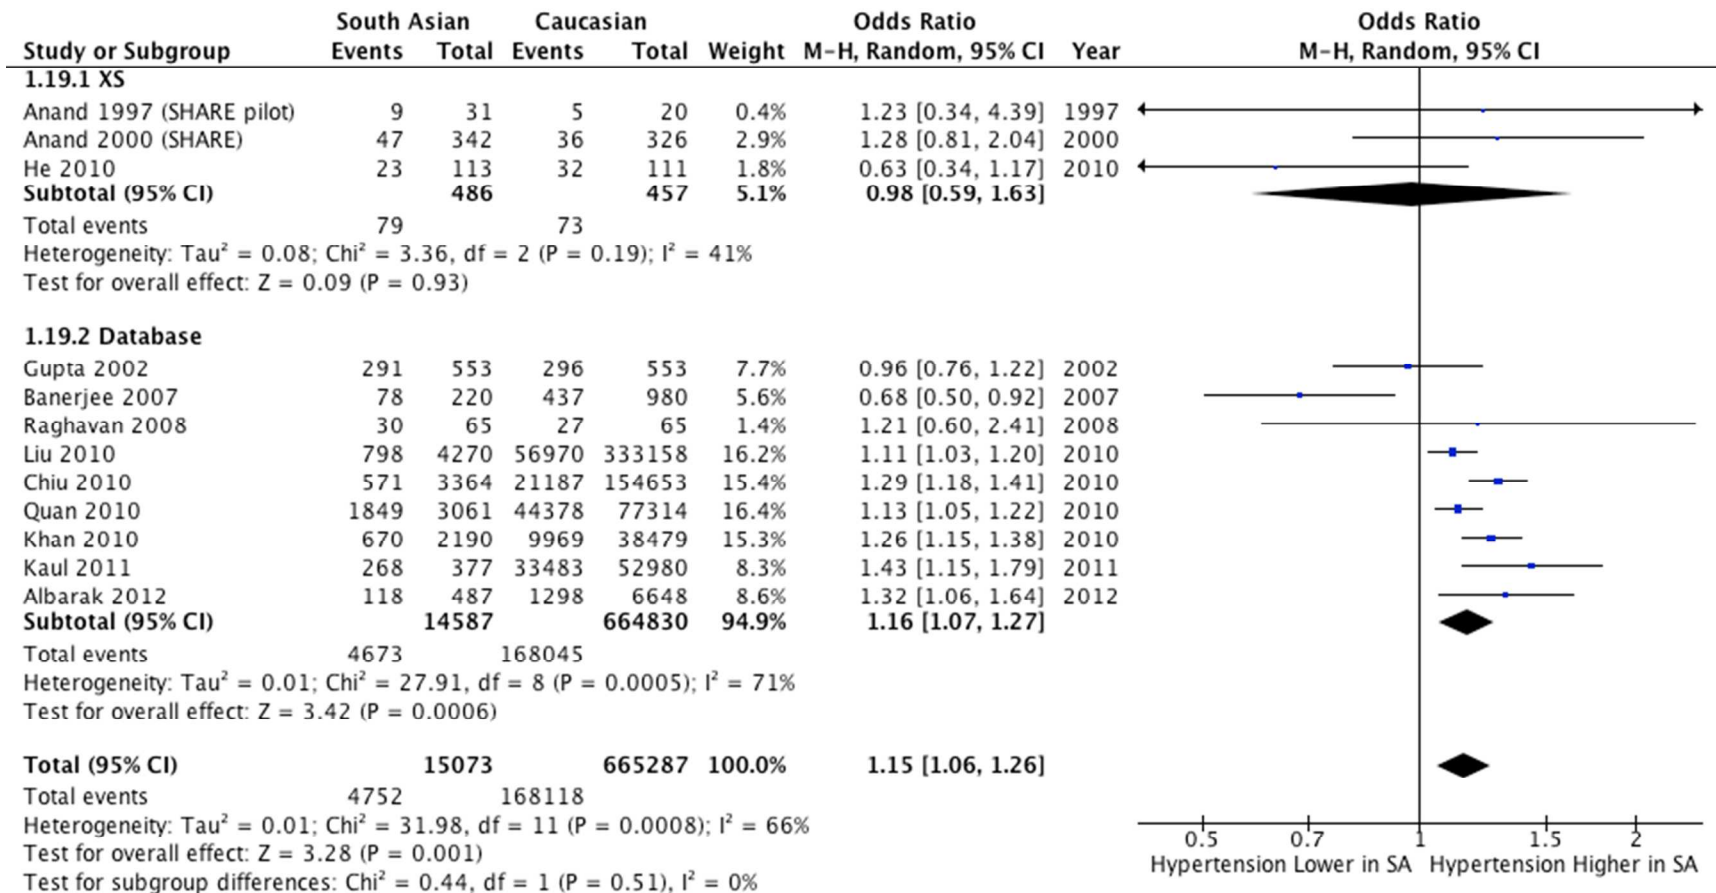

Figure 17. Forest plot of comparison: SA vs. WC, outcome: Hypertension

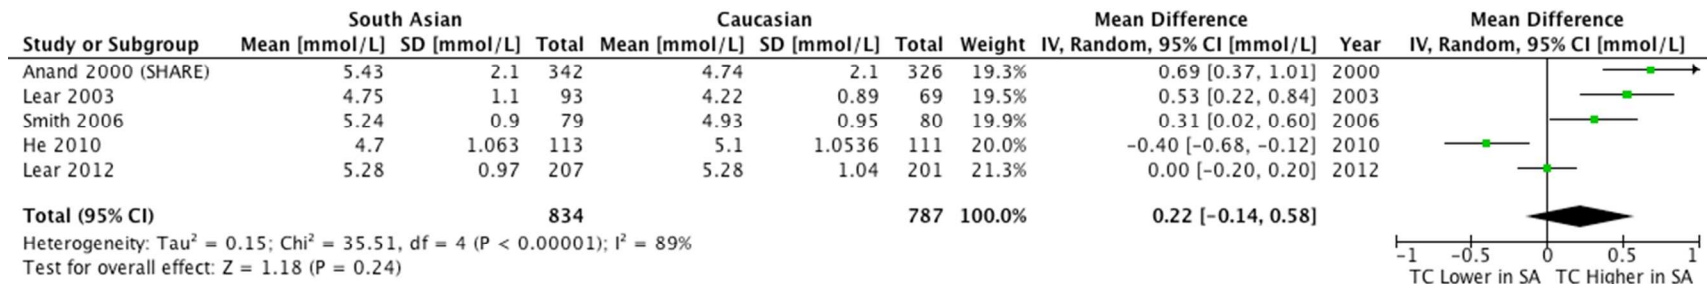

Figure 18. Forest plot of comparison: SA vs. WC, outcome: Total Cholesterol [mmol/L].

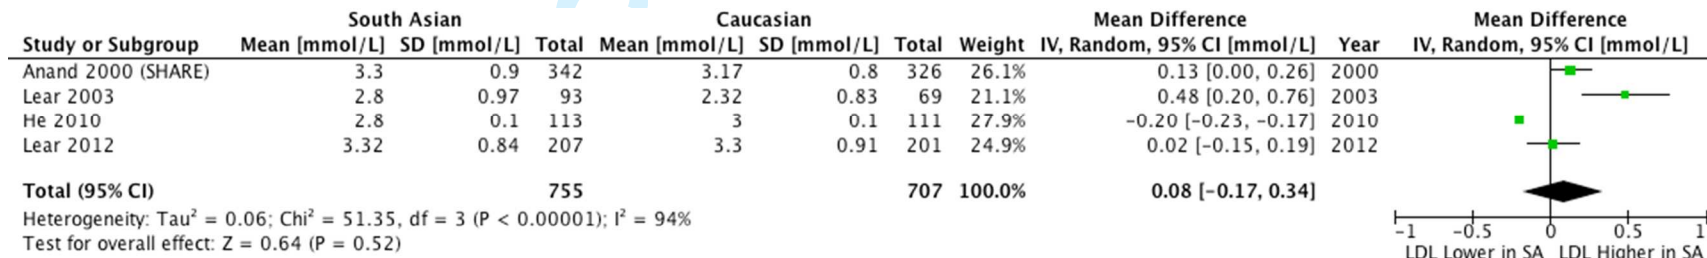

Figure 19. Forest plot of comparison: SA vs. WC, outcome: LDL-C [mmol/L].

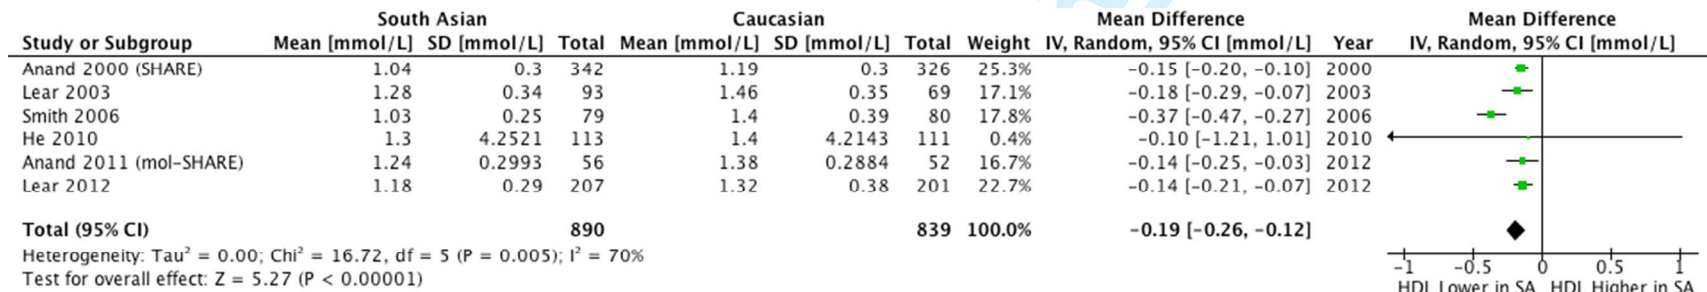

Figure 20. Forest plot of comparison: SA vs. WC, outcome: HDL-C [mmol/L].

1  
2  
3  
4  
5  
6  
7  
8  
9  
10  
11  
12  
13  
14  
15  
16  
17  
18  
19  
20  
21  
22  
23  
24  
25  
26  
27  
28  
29  
30  
31  
32  
33  
34  
35  
36  
37  
38  
39  
40  
41  
42  
43  
44  
45  
46  
47  
48  
49

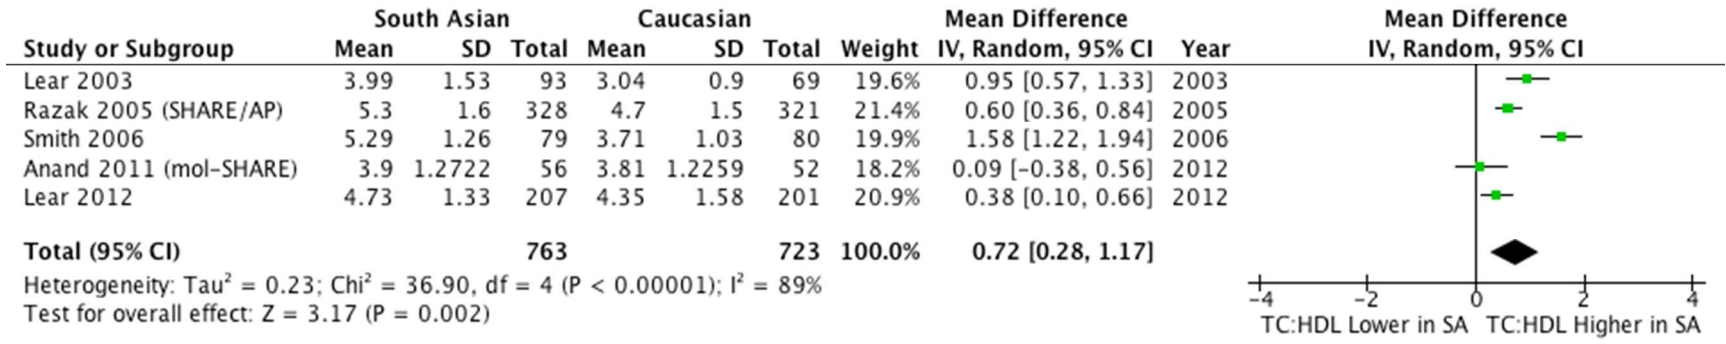

Figure 21. Forest plot of comparison: SA vs. WC, outcome: TC: HDL-C [mmol/L].

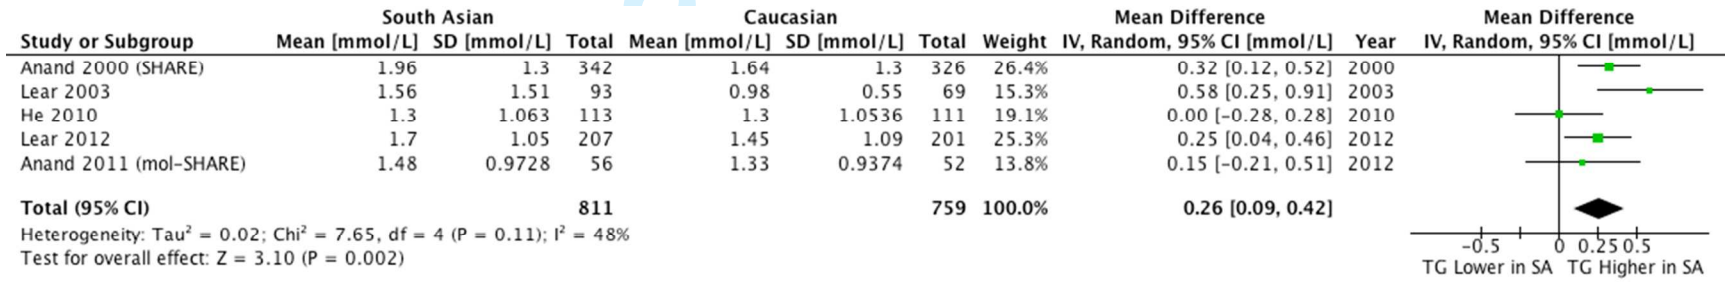

Figure 22. Forest plot of comparison: SA vs. WC, outcome: Triglycerides [mmol/L].

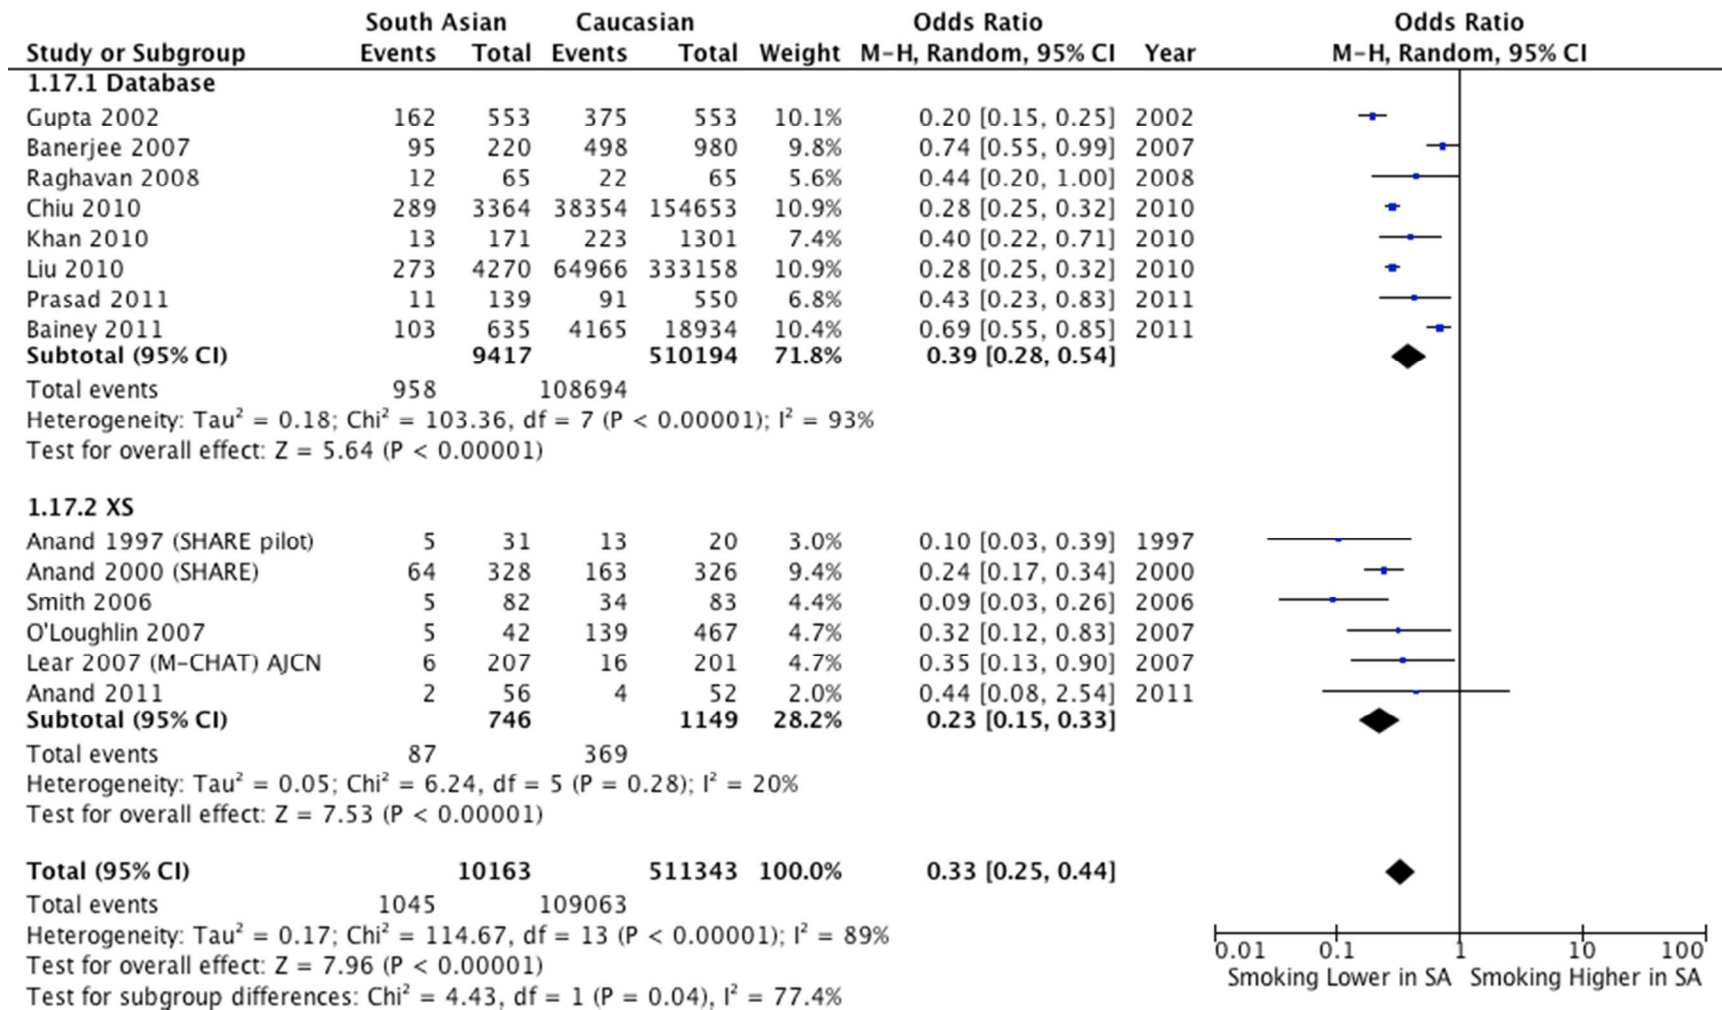

Figure 23. Forest plot of comparison: SA vs. WC, outcome: Smoking

1  
2  
3  
4  
5  
6  
7  
8  
9  
10  
11  
12  
13  
14  
15  
16  
17  
18  
19  
20  
21  
22  
23  
24  
25  
26  
27  
28  
29  
30  
31  
32  
33  
34  
35  
36  
37  
38  
39  
40  
41  
42  
43  
44  
45  
46  
47  
48  
49

Confidential

## Appendix 1

## Search Strategy:

```

1      Cardiovascular disease.mp. or exp Cardiovascular
2      Diseases/ (1734638)
3      cardio*.mp. (569398)
4      cardia*.mp. (495840)
5      heart*.mp. (918316)
6      coronary*.mp. (11)
7      angina*.mp. (58123)
8      ventric*.mp. (335032)
9      myocard*.mp. (422793)
10     pericard*.mp. (37376)
11     ischemi*.mp. (248980)
12     emboli*.mp. (110278)
13     arrhythmi*.mp. (100902)
14     thrombo*.mp. (312886)
15     atrial fibrillat*.mp. (39508)
16     tachycardi*.mp. (57832)
17     endocardi*.mp. (43527)
18     cardiomyopathy.mp. (47501)
19     vascul*.mp. (583854)
20     cerebrovasc*.mp. (102586)
21     sick sinus*.mp. (2945)
22     1 or 2 or 3 or 4 or 5 or 6 or 7 or 8 or 9 or 10 or 11
23     or 12 or 13 or 14 or 15 or 16 or 17 or 18 or 19 or 20
24     (2893189)
25     south asian*.mp. (2379)
26     exp Asian Continental Ancestry Group/ (31766)
27     exp India/ or india*.mp. (125658)
28     indian*.mp. (60002)
29     exp bangladesh/ or exp india/ or exp nepal/ or exp
30     pakistan/ or exp sri lanka/ (86935)
31     pakistan*.mp. (12324)
32     pakistani*.mp. (2486)
33     bangladesh*.mp. (7970)
34     bengali*.mp. (229)
35     nepal*.mp. (5363)
36     Srilanka*.mp. (7)
37     indo*.mp. (146235)
38     ethnic groups/ or asian americans/ (42900)
39     indo canadian.mp. (13)
40     indo asian.mp. (98)
41     asian canad*.mp. (47)
42     22 or 24 or 25 or 26 or 27 or 28 or 29 or 30 or 31 or
43     32 or 33 or 34 or 35 or 36 or 37 (333775)
44     cholesterol*.mp. or exp Cholesterol/ (203403)
45     lipid*.mp. (375922)
46     apolipoprotein B.mp. or exp Apolipoproteins B/
47     (12242)
48     hyperlipid*.mp. or exp Hyperlipidemias/ (61618)
49     lipaemia.mp. (403)

```

1  
2  
3  
4  
5  
6  
7  
8  
9  
10  
11  
12  
13  
14  
15  
16  
17  
18  
19  
20  
21  
22  
23  
24  
25  
26  
27  
28  
29  
30  
31  
32  
33  
34  
35  
36  
37  
38  
39  
40  
41  
42  
43  
44  
45  
46  
47  
48  
49  
50  
51  
52  
53  
54  
55  
56  
57  
58  
59  
60

44 blood pressure.mp. or exp Blood Pressure/ (340494)  
45 BP.mp. (105093)  
46 SBP.mp. (10707)  
47 DBP.mp. (8568)  
48 mean arterial pressure.mp. (22707)  
49 hypertensi\*.mp. (345936)  
50 exp Hypertension/ (195670)  
51 exp Acute-Phase Proteins/ (139403)  
52 body weight.mp. or exp Body Weight/ (392043)  
53 body fat.mp. or exp Adipose Tissue/ (75928)  
54 Body Mass Index/ or BMI.mp. (92077)  
55 waist circumference.mp. or exp Waist Circumference/  
56 (10470) Body Constitution/ or waist to hip.mp. or Waist-Hip  
57 Ratio/ (16792)  
58 exp Triglycerides/ (58028)  
59 hyperglycemia/ or glucose intolerance/ or  
60 hyperinsulinism/ or exp insulin resistance/ or exp metabolic  
syndrome x/ (68481)  
exp Hypercholesterolemia/ or hypercholesterol\*.mp.  
(34480)  
39 or 40 or 41 or 42 or 43 or 44 or 45 or 46 or 47 or  
48 or 49 or 50 or 51 or 52 or 53 or 54 or 55 or 56 or 57 or  
58 or 59 (1675739)  
38 and 60 (32676)  
21 and 38 (40412)  
21 and 23 (5073)

\*\*\*\*\*
